# Supplementary material for: How has technology been used to deliver cardiac rehabilitation during the COVID-19 pandemic? An international cross-sectional survey of healthcare professionals conducted by the BACPR
Source: PubMed Central journal article supplement — BMJ Open. 2021 Apr 20;11(4):e046051. doi: 10.1136/bmjopen-2020-046051 (PMC8061561; doi:10.1136/bmjopen-2020-046051), 2021-04-20
Supplement: bmjopen-2020-046051.draft_revisions.pdf [file bmjopen-2020-046051.draft_revisions.pdf]

# BMJ Open

BMJ Open is committed to open peer review. As part of this commitment we make the peer review history of every article we publish publicly available.

When an article is published we post the peer reviewers' comments and the authors' responses online. We also post the versions of the paper that were used during peer review. These are the versions that the peer review comments apply to.

The versions of the paper that follow are the versions that were submitted during the peer review process. They are not the versions of record or the final published versions. They should not be cited or distributed as the published version of this manuscript.

BMJ Open is an open access journal and the full, final, typeset and author-corrected version of record of the manuscript is available on our site with no access controls, subscription charges or pay-per-view fees (<http://bmjopen.bmj.com>).

If you have any questions on BMJ Open's open peer review process please email [info.bmjopen@bmj.com](mailto:info.bmjopen@bmj.com)

# BMJ Open

## A BACPR survey evaluating the use of technology in cardiac rehabilitation during the COVID-19 pandemic: insights for future practice

|                               |                                                                                                                                                                                                                                                                                                                                                                                                                                                                                                                                                                                                                                                                                                                                                                           |
|-------------------------------|---------------------------------------------------------------------------------------------------------------------------------------------------------------------------------------------------------------------------------------------------------------------------------------------------------------------------------------------------------------------------------------------------------------------------------------------------------------------------------------------------------------------------------------------------------------------------------------------------------------------------------------------------------------------------------------------------------------------------------------------------------------------------|
| Journal:                      | <i>BMJ Open</i>                                                                                                                                                                                                                                                                                                                                                                                                                                                                                                                                                                                                                                                                                                                                                           |
| Manuscript ID                 | bmjopen-2020-046051                                                                                                                                                                                                                                                                                                                                                                                                                                                                                                                                                                                                                                                                                                                                                       |
| Article Type:                 | Original research                                                                                                                                                                                                                                                                                                                                                                                                                                                                                                                                                                                                                                                                                                                                                         |
| Date Submitted by the Author: | 20-Oct-2020                                                                                                                                                                                                                                                                                                                                                                                                                                                                                                                                                                                                                                                                                                                                                               |
| Complete List of Authors:     | O'Doherty, Alasdair; Northumbria University, Department of Sport, Exercise and Rehabilitation<br>Humphreys, Helen; Sheffield Hallam University, Sport and Physical Activity Research Centre; Sheffield Hallam University, Advanced Wellbeing Research Centre<br>Dawkes, Susan; Edinburgh Napier University,<br>Cowie, Aynsley ; University Hospital Crosshouse, Cardiac Rehabilitation<br>Hinton, Sally; British Association for Cardiovascular Prevention and Rehabilitation<br>Brubaker, Peter; Wake Forest University, Department of Health and Exercise Science<br>Butler, Thomas; University of Chester,<br>Nichols, Simon; Sheffield Hallam University, Sport and Physical Activity Research Group; Sheffield Hallam University, Advanced Wellbeing Research Centre |
| Keywords:                     | REHABILITATION MEDICINE, Telemedicine < BIOTECHNOLOGY & BIOINFORMATICS, COVID-19, Adult cardiology < CARDIOLOGY                                                                                                                                                                                                                                                                                                                                                                                                                                                                                                                                                                                                                                                           |
|                               |                                                                                                                                                                                                                                                                                                                                                                                                                                                                                                                                                                                                                                                                                                                                                                           |

SCHOLARONE™  
Manuscripts

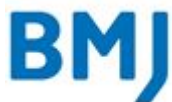

I, the Submitting Author has the right to grant and does grant on behalf of all authors of the Work (as defined in the below author licence), an exclusive licence and/or a non-exclusive licence for contributions from authors who are: i) UK Crown employees; ii) where BMJ has agreed a CC-BY licence shall apply, and/or iii) in accordance with the terms applicable for US Federal Government officers or employees acting as part of their official duties; on a worldwide, perpetual, irrevocable, royalty-free basis to BMJ Publishing Group Ltd ("BMJ") its licensees and where the relevant Journal is co-owned by BMJ to the co-owners of the Journal, to publish the Work in this journal and any other BMJ products and to exploit all rights, as set out in our [licence](#).

The Submitting Author accepts and understands that any supply made under these terms is made by BMJ to the Submitting Author unless you are acting as an employee on behalf of your employer or a postgraduate student of an affiliated institution which is paying any applicable article publishing charge ("APC") for Open Access articles. Where the Submitting Author wishes to make the Work available on an Open Access basis (and intends to pay the relevant APC), the terms of reuse of such Open Access shall be governed by a Creative Commons licence – details of these licences and which [Creative Commons](#) licence will apply to this Work are set out in our licence referred to above.

Other than as permitted in any relevant BMJ Author's Self Archiving Policies, I confirm this Work has not been accepted for publication elsewhere, is not being considered for publication elsewhere and does not duplicate material already published. I confirm all authors consent to publication of this Work and authorise the granting of this licence.

1  
2  
3 1 **A BACPR survey evaluating the use of technology in cardiac rehabilitation during the COVID-19**  
4 2 **pandemic: insights for future practice**  
5  
6 3

8 4 Alasdair F. O'Doherty<sup>1</sup>, Helen Humphreys<sup>2,3</sup>, Susan Dawkes<sup>4,5</sup>, Aynsley Cowie<sup>6,5</sup>, Sally Hinton<sup>5</sup>, Peter  
9 5 Brubaker<sup>7</sup>, Tom Butler<sup>8,5</sup>, Simon Nichols<sup>2,3,5\*</sup>  
10  
11 6

13 7 <sup>1</sup>Department of Sport Exercise and Rehabilitation, Northumbria University, Newcastle upon Tyne NE1  
14 8 8QH, United Kingdom, [alasdair.odoherty@northumbria.ac.uk](mailto:alasdair.odoherty@northumbria.ac.uk)  
15  
16

17 9 <sup>2</sup>Advanced Wellbeing Research Centre, Sheffield Hallam University, Sheffield, S9 3TY, United Kingdom,  
18 10 [H.Humphreys@shu.ac.uk](mailto:H.Humphreys@shu.ac.uk); [s.j.nichols@shu.ac.uk](mailto:s.j.nichols@shu.ac.uk)  
19  
20

21 11 <sup>3</sup>Sport and Physical Activity Research Centre, Sheffield Hallam University, Sheffield, S10 2BP, United  
22 12 Kingdom, [H.Humphreys@shu.ac.uk](mailto:H.Humphreys@shu.ac.uk); [s.j.nichols@shu.ac.uk](mailto:s.j.nichols@shu.ac.uk)  
23  
24

25 13 <sup>4</sup>School of Health and Social Care, Edinburgh Napier University, Edinburgh, EH11 4BN, United  
26 14 Kingdom, [s.dawkes@napier.ac.uk](mailto:s.dawkes@napier.ac.uk)  
27  
28

29 15 <sup>5</sup>British Association for Cardiovascular Prevention and Rehabilitation, Farnham, GU9 8BB, United  
30 16 Kingdom, [shinton@bacpr.com](mailto:shinton@bacpr.com)  
31  
32

33 17 <sup>6</sup>University Hospital Crosshouse, NHS Ayrshire & Arran, Kilmarnock, KA2 OBE, United Kingdom,  
34 18 [aynsleycowie@nhs.net](mailto:aynsleycowie@nhs.net)  
35  
36

37 19 <sup>7</sup>Department of Health and Exercise Science, Wake Forest University, Winston-Salem, NC 27109,  
38 20 United States of America, [brubaker@wfu.edu](mailto:brubaker@wfu.edu)  
39  
40

41 21 <sup>8</sup>Department of Clinical Sciences and Nutrition, University of Chester, Chester, CH1 4BJ, United  
42 22 Kingdom, [t.butler@chester.ac.uk](mailto:t.butler@chester.ac.uk)  
43  
44

45 23  
46 24 \*Corresponding author – Dr Simon Nichols: e-mail [s.j.nichols@shu.ac.uk](mailto:s.j.nichols@shu.ac.uk); tel 01142 254327  
47  
48  
49 25  
50  
51 26

52 27 **Words – 3131**  
53  
54 28  
55  
56  
57 29  
58  
59  
60

1  
2  
3 30 **Abstract**  
4  
5

6 31 **Objective:** To investigate whether exercise-based cardiac rehabilitation services continued during the  
7  
8 32 COVID-19 pandemic, and investigate how technology has been used to deliver home-based cardiac  
9  
10 33 rehabilitation.  
11  
12

13 34 **Design:** A mixed methods survey, including questions about exercise-based cardiac rehabilitation  
14  
15 35 service provision, programme diversity, patient complexity, technology use, barriers to using  
16  
17 36 technology, and safety.  
18  
19

20  
21 37 **Setting:** International survey of exercise-based cardiac rehabilitation programmes  
22  
23

24 38 **Participants:** Healthcare professionals working in UK, and international, exercise-based cardiac  
25  
26 39 rehabilitation programmes.  
27  
28

29 40 **Main outcome measures:** The proportion of programmes that continued providing exercise-based  
30  
31 41 cardiac rehabilitation, and which technologies had been used to deliver home-based cardiac  
32  
33 42 rehabilitation.  
34  
35

36 43 **Results:** Three-hundred and thirty eligible responses were received; 89.7% were from the UK.  
37  
38 44 Approximately half (49.3%) of respondents reported that CR programmes were suspended due to  
39  
40 45 COVID-19. Of programmes that continued; 22.4% used technology before the COVID-19 pandemic.  
41  
42 46 Programmes typically started using technology within 19 days of COVID-19 becoming a pandemic.  
43  
44 47 48.8% did not provide CR to high-risk patients, telephone was most commonly used to deliver CR, and  
45  
46 48 some centres used sophisticated technology such as teleconferencing.  
47  
48

49 49 **Conclusions:** The rapid adoption of technology into standard practice is promising and may improve  
50  
51 50 accessibility, or participation, in exercise-based CR beyond COVID-19. However, the exclusion of  
52  
53 51 certain patient groups and programme suspension, could worsen clinical symptoms and wellbeing,  
54  
55 52 and increase hospital admissions. Refinement of current practices, with a focus on improving  
56  
57  
58  
59  
60

1  
2  
3 53 inclusivity and addressing safety concerns around exercise support to high-risk patients, may be  
4  
5 54 needed.

6  
7  
8 55 **Abstract: 236 Words**

9  
10  
11 56 **Key words: Cardiac rehabilitation, COVID-19, Telehealth, Exercise training,**

12  
13  
14 57

15  
16  
17 58 **Article Summary**

18  
19  
20 59 **Strengths and limitations of this study**

- 21  
22  
23 60 • This is the first international reporting on the effect that COVID-19 restrictions have had on  
24  
25 61 exercise-based cardiac rehabilitation.
- 26  
27 62 • We report data from  $n=330$  cardiac rehabilitation programmes around the world, although  
28  
29 63 the majority of data were from the United Kingdom.
- 30  
31  
32 64 • Our mixed methods survey enabled us to investigate how technology has been used to deliver  
33  
34 65 exercise-based cardiac rehabilitation, as well the barriers to using technology.
- 35  
36 66 • Respondents were only able to complete the survey once, but we could have received more  
37  
38 67 than one response from professionals working in a single cardiac rehabilitation programme.
- 39  
40  
41 68 • Our data could be used to inform future research agendas, international healthcare policy,  
42  
43 69 and local healthcare decision making.

44  
45  
46 70

47  
48 71 **Financial support**

49  
50 72 This research received no specific grant from any funding agency in the public, commercial or not-for-  
51  
52 73 profit sectors

53  
54  
55 74

56  
57 75 **Competing interests**

58  
59 76 None declared

60

## 77 Introduction

78 Cardiac rehabilitation (CR) is a comprehensive programme of secondary prevention interventions for  
79 patients with heart disease, encompassing support for psychosocial health, medical risk management  
80 and cardiovascular risk factor modification, including and exercise training [1]. Exercise-based CR  
81 reduces cardiovascular deaths and recurrent myocardial infarction within 10 years, hospital  
82 admissions within 2 years, and improves health-related quality of life [2-5]. Despite these benefits,  
83 only 49% (n=141,648) of eligible United Kingdom (UK) patients enrolled on to a CR programme  
84 between 2012 and 2015 [6]. Increasing uptake to 65% could lead to 21,000 fewer hospital admissions  
85 and 8,500 fewer deaths over 10 years [7]. In response, NHS England set an ambitious target to increase  
86 CR uptake to 85% by 2029 [8].

87 COVID-19 is spread by a highly contagious virus. As of September 2020, it has infected 26,121,999 and  
88 has killed 864,618 people worldwide [9]. The rapid spread of COVID-19 infections resulted in  
89 governments imposing restrictions on face-to-face human contact [10]. Numerous 'non-essential'  
90 healthcare services were suspended and patient attendance to continuing services has decreased due  
91 to fear of contracting COVID-19 [11, 12]. The COVID-19 pandemic may therefore undermine efforts to  
92 increase uptake to exercise-based CR.

93 Before COVID-19, expanding the availability of home-based programmes was recommended to  
94 increase participation in exercise-based CR [13]. This is partly due to a lack of capacity within existing  
95 face-to-face services [14]. Yet, in 2019, 8.8% of UK CR patients participated in home-based  
96 programmes [15]. The recent suspension of face-to-face healthcare services may have led to  
97 programmes rapidly adopting home-based, technology facilitated services. Data from urgent and non-  
98 urgent care centres in the United States of America (USA) reported that teleconferencing  
99 consultations increased from 82 on March 4<sup>th</sup> 2020, to 1336 on 19<sup>th</sup> March 2020 [16]. If a similar rate  
100 of technology adoption occurred in CR, this could have helped to maintain patient participation. These  
101 methods could also be adopted in to future standard practice to increase accessibility and subsequent  
102 uptake onto CR programmes.

1  
2  
3 103 The aim of this mixed-methods survey, conducted in collaboration with the British Association for  
4  
5 104 Cardiovascular Prevention and Rehabilitation (BACPR), was to investigate whether exercise-based CR  
6  
7 105 services continued during the COVID-19 pandemic. We also evaluated whether technology was used  
8  
9 106 to deliver exercise-based CR, and the professional experiences of this technology, during the COVID-  
10  
11  
12 107 19 pandemic.

13  
14  
15 108

## 16 17 18 109 **Materials and Methods**

### 19 20 110 *Survey development*

21  
22  
23 111 The methods and results are reported in conjunction with the Checklist for Reporting Results of  
24  
25 112 Internet E-surveys (CHERRIES; Appendix 1) [17]. This voluntary, cross-sectional, international, open  
26  
27 113 survey, targeted at a convenience sample of healthcare professionals in exercise-based CR, was  
28  
29 114 developed by SN and AFO. The broad topic of questions, relating to the COVID-19 pandemic, were:

- 30  
31  
32 115 1. If and how CR services were provided.  
33  
34 116 2. The demographics and medical complexity of patients accessing CR services.  
35  
36 117 3. How technology was used to undertake patient assessments and deliver the exercise component  
37  
38 118 of CR.  
39  
40 119 4. The barriers encountered when using technology to deliver the exercise component of CR.  
41  
42  
43

44 120

45  
46  
47 121 The survey was reviewed by the members of the BACPR elected Council prior to ethical approval, and  
48  
49 122 amended accordingly. The BACPR council includes physicians, nurses, physiotherapists, exercise  
50  
51 123 physiologists, exercise instructors, psychologists, dietitians, and occupational therapists. The resulting  
52  
53 124 35-item questionnaire was uploaded to the Qualtrics<sup>XM</sup> online survey platform (Provo, Utah, USA).  
54  
55 125 Qualtrics has ISO/IEC 27001 security certification. The automated database was password protected  
56  
57 126 and stored on secure Qualtrics and Sheffield Hallam University servers. The survey was presented  
58  
59  
60



1  
2  
3 127 across 21 pages, including background information and consent. There were 22 tick box items (19  
4  
5 128 mandatory), seven mandatory numerical responses, three non-mandatory sliding bar responses, two  
6  
7 129 non-mandatory free-text responses, and one mandatory date entry response. Four questions also  
8  
9 130 permitted free-text responses under the option 'other'. Response validation was used on all questions,  
10  
11 131 where appropriate. Survey progress was displayed on each page. Participants did not have a  
12  
13 132 completeness check/review option at the end of the survey. Participants were only able to visit the  
14  
15 133 website once from the same IP address, and they had seven days to complete the survey once started.  
16  
17 134 The functionality of the survey was tested by SN, AOD, SD, SH, and AC. The final version of the online  
18  
19 135 survey (Appendix 2), was given institutional ethical approval by Sheffield Hallam University (ID:  
20  
21 136 ER24303491), on the 29<sup>th</sup> May 2020. All participants provided informed consent, and all study  
22  
23 137 procedures were carried out following the rules of the Declaration of Helsinki of 1975  
24  
25 138 (<https://www.wma.net/what-we-do/medical-ethics/declaration-of-helsinki/>), revised in 2013.  
26  
27  
28  
29  
30  
31  
32  
33

#### 34 140 *Patient and public involvement*

35 141 Patients and/or the public were not involved in the design, or conduct, or reporting or dissemination  
36  
37 142 plans of this research.  
38  
39  
40  
41  
42  
43  
44

#### 45 144 *Survey dissemination*

46 145 On 2<sup>nd</sup> June 2020, a recruitment e-mail was sent to BACPR members; 746 healthcare professionals and  
47  
48 146 academics working in CR. This was repeated on June 25<sup>th</sup> 2020. The survey was also promoted on  
49  
50 147 social media platforms (Appendix 3). A link to the survey *was not* posted on any website. The survey  
51  
52 148 closed at 12pm on 31<sup>st</sup> July 2020. There were no incentives offered for participation.  
53  
54  
55  
56  
57

#### 58 150 *Quantitative data analysis*

59  
60

1  
2  
3 151 Categorical data are reported as the number of responses, expressed as a percentage (%) of the  
4  
5 152 respondents to each question. Continuous data are reported as median, with minimum and maximum  
6  
7 153 values. Responses were reported for the full cohort, and by the Phase of CR that the respondents  
8  
9 154 worked in. Phase I was defined as the inpatient stage, Phase II as the early discharge phase, Phase III  
10  
11 155 as a clinically supervised outpatient programme, and Phase IV as long-term physical activity  
12  
13  
14 156 maintenance. Tests of statistical significance were not conducted.  
15  
16

17 157

### 18 19 20 158 *Qualitative Data analysis*

21  
22  
23 159 Free text answers were exported into NVivo 11 software for thematic analysis. Answers were coded  
24  
25 160 inductively. The resulting coding framework was then reviewed to identify patterns and themes in  
26  
27 161 the data. Similar codes were grouped to form lower order themes, which were then grouped into  
28  
29 162 higher order themes. Each theme was given a descriptive explanation with illustrative quotes.  
30  
31

32 163

## 33 34 35 164 **Results**

### 36 37 165 *Responses*

38  
39 166 Four-hundred and seven visits to the survey site were recorded. Seventy-seven (18.9%) did not  
40  
41 167 progress past the study information and consent page (81.1% participation rate). Three-hundred and  
42  
43 168 thirty responses were analysed, 296 (89.7%) were from the UK. The remaining responses were from  
44  
45 169 Japan ( $n=8$ ; 2.4%), Australia ( $n=4$ ; 1.2%), the USA ( $n=4$ ; 1.2%), Republic of Ireland ( $n=4$ ; 1.2%), Gibraltar  
46  
47 170 ( $n=2$ ; 0.6%), India ( $n=2$ ; 0.6%), South Africa ( $n=2$ ; 0.6%), Spain ( $n=2$ ; 0.6%), the Bailiwick of Guernsey  
48  
49 171 ( $n=1$ ; 0.3%), Canada ( $n=1$ ; 0.3%), the Isle of Man ( $n=1$ ; 0.3%), and Kuwait  $n=1$ ; (0.3%).  
50  
51

52 172

### 53 54 55 173 *Service provision during COVID-19*

56  
57 174 At the time of responding, 163 (49.3%) CR programmes had been suspended due to COVID-19. The  
58  
59 175 proportion of UK ( $n=147$ ; 49.7%) and non-UK ( $n=16$ ; 47.1%) services that had been suspended were  
60

176 similar. Phase IV programmes were most likely to have suspended all activity ( $n=89$ ; 72.4%). The  
177 remaining questions in the survey were applicable to 167 respondents (Table 1).

178 Following COVID-19 restrictions, 32 (19.9%) programmes reported that the same volume of patients  
179 were choosing to access their service. Most programmes (80.1%) reported that either fewer patients,  
180 or no patients were choosing to access their service. Programmes believed that patients enrolling in  
181 CR were either as demographically as diverse', or more diverse, than normal ( $n=129$ ; 85.4%). UK CR  
182 programmes also estimated that 90.4% (0.0 to 100.0%) of patients seen in the last seven days were  
183 'White British'. Most CR programmes (92.5%) reported that the age of participants was similar to  
184 normal, with 70% (0.0 to 100.0%) of patients enrolling in CR >65 years of age. Programmes also  
185 reported that the sex of patients participating in CR was proportionally similar to normal. Female  
186 participation in CR was estimated at 30% (0.0 to 80%).

187

#### 188 *Technology adoption*

189 Figure 1 shows the increase in adoption of technology over time. The earliest date that a programme  
190 reported used technology was the 10<sup>th</sup> January 2010. The latest was the 20<sup>th</sup> June 2020. Twenty-eight  
191 programmes (22.4%) used technology to deliver exercise-based CR before COVID-19 was declared a  
192 pandemic by the World Health Organisation (WHO) [18]. The median date of technology adoption was  
193 30<sup>th</sup> March 2020. There were notable increases in technology adoption, the first coincided with the  
194 release of the NHS long-term plan [8]. The second, more rapid increase, coincides with COVID-19  
195 pandemic [18].

196

#### 197 *Technology use in patient assessment*

198 The most commonly used technology was telephone ( $n=113$ ; 85.0%). 23.1% ( $n=32$ ) of programmes  
199 reported that they were not assessing or estimating functional capacity. Practitioners mostly relied on

1  
2  
3 200 patient self-reported fitness to estimate functional capacity ( $n=92$ ; 69.2%). Some programmes  
4  
5 201 estimated functional capacity by using a questionnaire (26.3%,  $n=35$ ), or the patient's own physical  
6  
7 202 activity tracker (21.1%,  $n=28$ ). One Phase I (16.7%), two phase II (14.3%), and four Phase IV CR  
8  
9 203 programmes (13.8%) remotely supervised exercise testing (Figure 2).  
10  
11  
12  
13  
14  
15  
16  
17  
18  
19  
20  
21  
22  
23  
24  
25  
26  
27  
28  
29  
30  
31  
32  
33  
34  
35  
36  
37  
38  
39  
40  
41  
42  
43  
44  
45  
46  
47  
48  
49  
50  
51  
52  
53  
54  
55  
56  
57  
58  
59  
60

For peer review only

Table 1 – Provision of cardiac rehabilitation services during the COVID-19 pandemic, displayed as number (%)

|                                                                          | All                 | Phase I             | Phase II             | Phase III           | Phase IV            |
|--------------------------------------------------------------------------|---------------------|---------------------|----------------------|---------------------|---------------------|
| <b>Service status</b>                                                    | (n=330)             | (n=14)              | (n=29)               | (n=164)             | (n=123)             |
| Services able to see as many patients as usual                           | 44 (13.3)           | 2 (14.3)            | 6 (20.7)             | 30 (18.3)           | 6 (4.9)             |
| Service able to see fewer patients                                       | 123 (37.3)          | 6 (42.9)            | 12 (41.4)            | 77 (47.0)           | 28 (22.8)           |
| Service suspended (%)                                                    | 163 (49.4)          | 7 (42.9)            | 11 (37.9)            | 57 (34.8)           | 89 (72.4)           |
| <b>Patients accessing cardiac rehabilitation</b>                         | (n=161)             | (n=8)               | (n=17)               | (n=102)             | (n=34)              |
| No patients are accessing the service                                    | 18 (11.2)           | 2 (25.0)            | 3 (17.6)             | 9 (8.8)             | 4 (11.8)            |
| Fewer patients are accessing the service                                 | 111 (68.9)          | 5 (62.5)            | 13 (76.5)            | 65 (63.7)           | 28 (82.4)           |
| Same number of patients are accessing the service                        | 32 (19.9)           | 1 (12.5)            | 1 (5.9)              | 28 (27.5)           | 2 (5.9)             |
| <b>Diversity of cardiac rehabilitation</b>                               | (n=151)             | (n=7)               | (n=16)               | (n=95)              | (n=33)              |
| Patient population is less diverse than before COVID-19                  | 22 (14.6)           | 3 (42.9)            | 1 (6.25)             | 13 (13.7)           | 5 (15.2)            |
| Patient population is as diverse as it was before COVID-19               | 122 (80.8)          | 4 (57.1)            | 15 (93.8)            | 78 (82.1)           | 25 (75.8)           |
| Patient population is more diverse than before COVID-19                  | 7 (4.6)             | 0 (0.0)             | 0 (0.0)              | 4 (4.2)             | 3 (9.1)             |
| Patient population is younger than before COVID-19                       | 6 (4.1)             | 0 (0.0)             | 2 (13.3)             | 2 (2.2)             | 2 (6.3)             |
| Patient population is similar to what it was before COVID-19             | 135 (92.5)          | 5 (71.4)            | 12 (80.0)            | 89 (96.7)           | 29 (90.6)           |
| Patient population is older than before COVID-19                         | 5 (3.4)             | 2 (28.6)            | 1 (6.7)              | 1 (1.1)             | 1 (3.1)             |
| Estimated percentage of patients in the last 7 days that were >65 years? | 70.0 (0.0 to 100.0) | 75.0 (60.0 to 85.0) | 67.0 (38.0 to 100.0) | 64.5 (0.0 to 100.0) | 80.0 (0.0 to 100.0) |
| Proportion of female participation is smaller                            | 11 (0.8)            | 1 (16.7)            | 0 (0.0)              | 8 (9.4)             | 2 (6.9)             |
| Proportion of female participation is the same                           | 113 (83.7)          | 4 (66.7)            | 14 (93.3)            | 69 (81.2)           | 26 (89.7)           |
| Proportion of female participation is larger                             | 11 (0.8)            | 1 (16.7)            | 1 (6.7)              | 8 (9.4)             | 1 (3.4)             |
| Proportion of male participation is smaller                              | 6 (4.4)             | 1 (16.7)            | 1 (6.7)              | 2 (2.4)             | 2 (7.0)             |
| Proportion of male participation is the same                             | 123 (91.1)          | 4 (66.7)            | 14 (93.3)            | 79 (92.9)           | 26 (89.7)           |
| Proportion of male participation is larger                               | 6 (4.4)             | 1 (16.7)            | 0 (0.0)              | 4 (4.7)             | 1 (3.4)             |
| Estimated percentage of patients in the last 7 days were female?         | 30.0 (0.0 to 80.0)  | 40.0 (10.0 to 70.0) | 30.0 (1.0 to 57.0)   | 30.0 (0.0 to 80.0)  | 40.0 (1.0 to 73.0)  |

1  
2  
3 204  
4  
56 205 *Technology use in physical activity and exercise prescription*  
7  
8

9 206 Most services were able to provide physical activity advice ( $n=102$ ; 82.9%). Seventy-two (58.5%)  
10  
11 207 programmes ( $n=72$ ) also offered structured exercise training programmes. Telephone remained the  
12  
13 208 most commonly used technology to facilitate the physical activity or exercise component of CR ( $n=86$ ,  
14  
15 209 64.7%). Pre-recorded online videos ( $n=69$ ; 51.9%) were also widely used, particularly among Phase III  
16  
17 210 programmes ( $n=54$ ; 64.3%; Figure 3). Most CR services were able to provide physical activity or  
18  
19 211 structured exercise training to patients at low ( $n=117$ ; 95.1%) and moderate risk ( $n=109$ ; 88.6%) of  
20  
21 212 exercise-induced cardiac events. Half (51.2%;  $n=63$ ) were able to offer services to patients at high-risk  
22  
23 213 of exercise-induced cardiac events. Three (2.8%) programmes reported one adverse event resulting in  
24  
25 214 minor injury whilst using technology to deliver the exercise component of CR (three events in total).  
26  
27 215 There were no reports of life changing injury, or death.  
28  
29  
30

31  
32 216  
33  
3435 217 *Barriers to using technology*  
36  
37

38 218 Respondents were asked to state *any* barriers that they encountered when using technology. Only  
39  
40 219 two (1.9%) programmes reported 'no barriers'. Most ( $n=93$ ; 86.9%) encountered a "lack of patient  
41  
42 220 confidence" with technology (Table 2). Qualitative analysis of the barriers to using technology fell into  
43  
44 221 two categories; logistical and organisational barriers, and patient-related barriers. Logistical and  
45  
46 222 organisational barriers were largely a result of healthcare organisations being unprepared, and not  
47  
48 223 familiar with using online healthcare delivery. Onerous governance processes or delayed access to the  
49  
50 224 necessary IT equipment were also described. Patient-related barriers were associated with  
51  
52 225 communication (either language or understanding), and concerns that patients were either over-  
53  
54 226 reporting their activity or not following advice provided.  
55  
56  
57  
58  
59 227  
60

1  
2  
3 228 *Practitioner experiences*  
4  
5

6 229 Qualitative analysis of free text answers to the final question allowing “Any other comments” resulted  
7  
8 230 in the identification of three higher order themes; i) impact on patient experience; ii) challenges for  
9  
10 231 staff and iii) implications for future delivery.  
11  
12

13 232  
14  
15

16 233 i) Impact on patient experience  
17  
18

19 234 Survey respondents varied in their views about the impact on patient engagement and experience.  
20

21 235 Technology was acknowledged as a valuable means of connecting patients with CR staff, but a small  
22  
23 236 number of respondents also highlighted that it was harder to establish a rapport this way. One  
24  
25 237 participant reported a decline in patients’ fitness outcomes whilst another claimed that patients  
26  
27 238 exercised harder at home without peers to distract them. More commonly, participants reported that  
28  
29 239 regardless of the perceived benefits of remote delivery, it was difficult to replicate the social benefits  
30  
31 240 associated with group exercise delivery:  
32  
33  
34

35 241  
36  
37

38 242 *“The lack of contact with other patients means the patients miss out on the social and*  
39 243 *emotional support from each other.”*  
40  
41  
42  
43  
44  
45  
46  
47  
48  
49  
50  
51  
52  
53  
54  
55  
56  
57  
58  
59  
60

Table 2 –Barriers to using technology in exercise-based cardiac rehabilitation displayed as number (%)

| Barriers to using technology                                                       | All (n=107) | Phase I (n=6) | Phase II (n=9) | Phase III (n=68) | Phase IV (n=24) |
|------------------------------------------------------------------------------------|-------------|---------------|----------------|------------------|-----------------|
| Lack of patient confidence                                                         | 93 (86.9)   | 2 (33.3)      | 8 (88.9)       | 60 (88.2)        | 23 (95.8)       |
| Patients do not have access to computers/tablets/smart phone                       | 86 (80.4)   | 2 (33.3)      | 4 (44.4)       | 61 (89.7)        | 19 (79.2)       |
| Patients do not have an internet connection                                        | 73 (68.2)   | 2 (33.3)      | 6 (66.7)       | 48 (70.6)        | 17 (70.8)       |
| Patients lack of interest in receiving services using technology                   | 65 (60.7)   | 1 (16.7)      | 5 (55.6)       | 44 (64.7)        | 15 (62.5)       |
| Professionals are concerned about patient safety                                   | 43 (40.2)   | 0 (0.0)       | 3 (33.3)       | 34 (50.0)        | 6 (25.0)        |
| Patients are concerned about safety                                                | 32 (29.9)   | 2 (33.3)      | 3 (33.3)       | 21 (30.9)        | 6 (25.0)        |
| Internet security and patient confidentiality concerns                             | 27 (25.2)   | 1 (16.7)      | 4 (44.4)       | 18 (25)          | 4 (16.7)        |
| Professionals not confident delivering service using technology                    | 24 (22.4)   | 0 (0.0)       | 2 (22.2)       | 19 (27.9)        | 3 (12.5)        |
| Trust/Health Board do not support the delivery of health services using technology | 16 (15.0)   | 1 (16.7)      | 0 (0.0)        | 14 (20.6)        | 1 (4.2)         |
| No barriers                                                                        | 2 (1.9)     | 1 (11.1)      | 0 (0.0)        | 1 (1.5)          | 0 (0.0)         |



1  
2  
3 227 ii) Challenges for professionals  
4  
5

6 228 Survey participants cited a range of challenges to adoption of technology, including the limitations of  
7  
8 229 existing platforms, such as smart device applications for CR. These were described as lacking patient-  
9  
10 230 centred or motivational content and time-consuming to use. Participants reported further difficulties  
11  
12 231 associated with COVID-19 related staff redeployment or illness, and reiterated barriers such as lack of  
13  
14 232 access to technology and organisational delays caused by IT and governance restrictions.  
15  
16

17  
18 233 A large number of comments described concerns relating to practitioners' inability to observe  
19  
20 234 patients, limiting safe and accurate assessment of functional capacity. This had resulted in a more  
21  
22 235 cautious approach, with respondents reporting that they prescribed only gentle or low-level exercise:  
23  
24

25 236 *"Our main concern has been the difficulty of not being able to complete functional capacity*  
26  
27 237 *assessments, we have therefore recommended patients exercise at a lower level than we*  
28  
29 238 *normally would."*  
30  
31

32  
33 239

34 240 iii) Implications for future delivery  
35  
36

37 241 Many respondents reported optimism about continuing to incorporate technology in future CR  
38  
39 242 delivery. Nevertheless, it was generally recognised that delivery should be flexible. Exercise  
40  
41 243 programmes should be tailored to individual needs and risk levels and patients should be provided  
42  
43 244 with a range of options for engaging with CR, including both face-to-face contact with CR staff and  
44  
45 245 online/home-based exercise.  
46  
47

48  
49 246 Several comments indicated opportunities for improvement in the technology available, with one  
50  
51 247 participant suggesting that current formats were driven by NACR audit data requirements as opposed  
52  
53 248 to patient needs. Another respondent called for further research to inform more confident remote  
54  
55 249 exercise prescription:  
56  
57  
58  
59  
60

1  
2  
3 227 *“Still feel face to face assessment is superior for more frail patients ...and for higher risk patients...*  
4  
5 228 *Nevertheless, I am gaining more confidence in remote assessment, and would be reassured further by*  
6  
7 229 *some research to demonstrate its safety and efficacy. I already know remote delivery has been shown*  
8  
9 230 *to be safe and effective, but as far as I am aware this has been evidenced only when prescribed from*  
10  
11 231 *face to face assessment.”*  
12  
13  
14

15 232

16  
17  
18 233 Quantitatively, 94 (88.7%) programmes believed that technology should be available for patients in  
19  
20 234 the future.  
21  
22

23 235

## 26 236 **Discussion**

27  
28  
29 237 To our knowledge, this is the first study to quantitatively document the effect that restrictions,  
30  
31 238 imposed due to COVID-19, had on exercise-based CR programmes. We found that nearly half of all  
32  
33 239 programmes had been suspended and that most centres reported a reduction in patient engagement  
34  
35 240 with services during the COVID-19 pandemic. Practitioners reported that the age and sex of patients  
36  
37 241 attending CR was similar to before the COVID-19 pandemic. Technology was rapidly adopted to deliver  
38  
39 242 CR, with less sophisticated technology, such as the telephone, being most widely used. Higher risk  
40  
41 243 patients were less likely to be offered remote CR using technology. Nearly all centres reported barriers  
42  
43 244 to using technology to deliver CR. Finally, despite an openness to adopting technology by practitioners,  
44  
45 245 there were concerns surrounding availability of, and confidence in using technology. Qualitatively,  
46  
47 246 patient assessment, less opportunity for socialisation, and safety were highlighted.  
48  
49  
50

51 247

### 55 248 *Service provision*

56  
57  
58 249 COVID-19 has resulted in many non-essential healthcare services being suspended. We have shown  
59  
60 250 that this was true for half of exercise-based CR services. In 2019, 89,573 patients accessed exercise-

1  
2  
3 227 based CR in the UK [15], therefore a high proportion of cardiac patients may have been negatively  
4  
5 228 affected by this widespread service disruption. Given that exercise-based CR improves quality of life  
6  
7 229 [4, 19] and reduces hospital admissions [3], suspension of services is likely to result in worsening  
8  
9  
10 230 clinical symptoms, wellbeing, and increased hospital admissions long-term. This may place an  
11  
12 231 increased burden on healthcare services in the coming months. Nevertheless, there was an increase  
13  
14 232 in the use of technology in CR shortly after COVID-19 was declared a Pandemic by the WHO [18].  
15  
16 233 Comparing long-term patient outcomes from programmes that continued service provision with  
17  
18 234 programmes that were unable to continue will help to determine the effectiveness of these changes.  
19  
20  
21  
22  
23  
24

#### 25 236 *Technology adoption and barriers*

26  
27 237 Recent editorials and reviews have suggested that COVID-19 could be a catalyst for large-scale  
28  
29 238 changes in the way that CR is delivered [20, 21]. We found that most services started using technology  
30  
31 239 to deliver home-based exercise-based CR within three weeks of COVID-19 being declared a pandemic  
32  
33 240 by the WHO [18], only three services were providing face-to-face services. This suggests that the  
34  
35 241 capacity of CR services to provide home-based rehabilitation programmes has rapidly increased. If  
36  
37 242 maintained, subject to robust evidence, the potential for increased accessibility, could positively  
38  
39 243 influence participation in CR when face-to-face service have resumed.  
40  
41  
42  
43

44 244 Traditional modes of communication such as telephone were most commonly used. Surprisingly few  
45  
46 245 services used tele-conferencing, smart device applications and web-based systems. Healthcare  
47  
48 246 professionals cited that patients often lacked confidence using equipment and/or that patients did  
49  
50 247 not have the required equipment for technology use. The number and sociodemographic profile of  
51  
52 248 patients for whom this was a genuine barrier is unclear. Others have reported that age may be a factor,  
53  
54 249 with people aged 22-44 years most likely use tele-conferencing facilities [16], and people over 65 years  
55  
56 250 being less likely to have a smart phone [22]. This could warrant further investigation to address  
57  
58 251 inequalities in the accessibility of technology-based provision of CR. Meanwhile, professionals'

1  
2  
3 227 concern for patient safety (40.2%) and internet security (25.2%) were also likely to contribute to the  
4  
5 228 low uptake of novel technology. Healthcare organisations being underprepared for the adoption of  
6  
7 229 new technology may also play a role, although this was less frequently reported in quantitative  
8  
9 230 analysis. 'Top-down' endorsement of technology by health Trusts, Health Boards or healthcare  
10  
11 231 providers may give healthcare professionals confidence in using technology.  
12  
13  
14  
15 232

### 17 233 *Participation*

18  
19  
20 234 Participation in CR continued despite COVID-19 restrictions. However, programmes were able to offer  
21  
22 235 services to fewer patients and uptake was reduced. Furthermore, UK programmes reported that ~90%  
23  
24 236 of participants were 'White British', which is proportionately higher than recently indicated (79%) in  
25  
26 237 the 2019 NACR report [15]. Future research should investigate the direct impact of COVID-19 on  
27  
28 238 minority group participation in exercise-based CR, and explore how to increase their participation  
29  
30 239 when it is delivered using technology. Encouragingly, programmes reported that similar proportions  
31  
32 240 of males and females, and people over the age of 65 years, engaged with CR compared to pre-COVID-  
33  
34 241 19 participation.

35  
36  
37 242 Data from our survey showed that 41.5% of programmes were unable to provide exercise-based CR  
38  
39 243 to patients at high-risk of exercise-induced cardiac events. CR should be available to all eligible  
40  
41 244 patients, irrespectively of risk [1]. The development and refinement of future technology-based  
42  
43 245 interventions should be inclusive of all risk levels. Qualitative comments highlighted concerns about  
44  
45 246 using technology to remotely deliver exercise-based CR for frail patients. Safety concerns were also a  
46  
47 247 common feature in our quantitative analysis (Table 2). The wide use of 'offline' delivery modes such  
48  
49 248 as telephone and pre-recorded videos identified in our survey limits the capacity to evaluate  
50  
51 249 physiological information during exercise and the scope for practitioners to tailor advice to the  
52  
53 250 individual. It may be perceived as unsafe for patients at high-risk of exercise-induced event, but not  
54  
55  
56  
57  
58  
59  
60

1  
2  
3 227 for lower risk patients. Overcoming these concerns, through robust evidence, may be an important  
4  
5 228 step in negating future health inequalities.  
6  
7

8 229  
9

10  
11 230 *Limitations*  
12

13  
14 231 Most respondents were from the UK, which may limit generalisability of the findings to international  
15  
16 232 programmes. Individual practitioners rather than centres were targeted to respond. Therefore, the  
17  
18 233 risk of bias could have been increased by multiple practitioners from the same centre completing the  
19  
20 234 survey. The sample size should limit interpretation bias.  
21  
22

23  
24 235  
25

26 236 *Conclusions*  
27

28  
29 237 Nearly half of all CR programmes have been suspended during COVID-19 restrictions. Technology was  
30  
31 238 rapidly adopted by CR services which may increase participation beyond COVID-19. However, higher  
32  
33 239 risk patients may be disadvantaged by technology use, whilst people in the UK who are 'White British'  
34  
35 240 may be most likely to benefit for it. Our findings indicate a role for technology in future CR delivery.  
36  
37 241 There is a need for innovation in patient-centred, interactive technological resources that also foster  
38  
39 242 confidence amongst practitioners. Future research needs to investigate the longer-term adoption of  
40  
41 243 technology in CR following COVID-19, and its effects on participation, patient experience and safety.  
42  
43  
44  
45  
46  
47  
48  
49  
50  
51  
52  
53  
54  
55  
56  
57  
58  
59  
60

1  
2  
3 244 **Author Statement**  
4

5  
6 245 **Conceptualization:** Simon Nichols; **Methodology:** Simon Nichols, Alasdair O'Doherty, Helen Susan  
7  
8 246 Dawkes, Aynsley Cowie, Sally Hinton; **Formal Analysis:** Simon Nichols, Alasdair O'Doherty, Helen  
9  
10 247 Humphreys; **Investigation:** Simon Nichols, Alasdair O'Doherty, Helen Susan Dawkes, Aynsley Cowie,  
11  
12 248 Sally Hinton, Peter Brubaker, Tom Butler; **Data curation:** Simon Nichols, Helen Humphreys; **Writing-**  
13  
14 249 **Original draft preparation:** Simon Nichols; **Writing - Review & Editing:** Simon Nichols, Alasdair  
15  
16 250 O'Doherty, Helen Susan Dawkes, Aynsley Cowie, Sally Hinton, Peter Brubaker, Tom Butler;  
17  
18 251 **Visualization:** Simon Nichols; **Supervision:** Simon Nichols; **Project Administration:** Simon Nichols  
19  
20  
21  
22  
23  
24

252

25 253 **Acknowledgements**  
26  
27

28 254 The authors would like to thank the healthcare professionals who completed the survey and the  
29  
30 255 BACPR committee for reviewing the design of the survey. We would also like to thank the individuals  
31  
32 256 involved in promoting the survey within their networks.  
33  
34  
35  
36

257

37 258 **Patient and public involvement**  
38

39 259 Patients and/or the public were not involved in the design, or conduct, or reporting or dissemination  
40  
41 260 plans of this research.  
42  
43  
44

261

46 262 **Data sharing**  
47

48 263 Data will be available, on reasonable request, 18 months after publication of the manuscript. Data can  
49  
50 264 be requested by contacting the corresponding author, or by contacting [library-research-](mailto:library-research-support@shu.ac.uk)  
51  
52 265 [support@shu.ac.uk](mailto:library-research-support@shu.ac.uk).  
53  
54

266

267  
58  
59  
60

1  
2  
3 244 **Figure 1** – Data showing the use of technology to deliver exercise-based cardiac rehabilitation between  
4 January 2010 and June 2020. Black bars indicate how many programmes started using their chosen  
5 245 technology, on a given date. The grey area shows the cumulative number of cardiac rehabilitation  
6 246 programmes using technology.  
7  
8  
9 247  
10  
11 248  
12  
13 249

14 **Figure 2** – Types of technology used to undertake baseline assessments. Orange bars indicate Phase I  
15 250 programmes, yellow bars indicate Phase II programmes, green lines indicate Phase III programmes, red bars  
16 251 indicate Phase IV programmes.  
17  
18 252  
19  
20 253  
21

22 **Figure 3** – Types of technology used to deliver the exercise component of cardiac rehabilitation. Orange bars  
23 254 indicate Phase I programmes, yellow bars indicate Phase II programmes, green lines indicate Phase III  
24 255 programmes, red bars indicate Phase IV programmes.  
25  
26 256  
27  
28 257  
29  
30 258  
31  
32 259  
33  
34 260  
35  
36 261  
37  
38 262  
39  
40 263  
41  
42 264  
43  
44 265  
45  
46 266  
47  
48 267  
49  
50 268  
51  
52 269  
53  
54 270  
55  
56 271  
57  
58 272  
59  
60 273  
274

244 **References**

- 245 1. Cowie, A., et al., *Standards and core components for cardiovascular disease prevention and*  
 246 *rehabilitation*. Heart, 2019. **105**(7): p. 510-515.
- 247 2. Abell, B., P. Glasziou, and T. Hoffmann, *The Contribution of Individual Exercise Training*  
 248 *Components to Clinical Outcomes in Randomised Controlled Trials of Cardiac Rehabilitation:*  
 249 *A Systematic Review and Meta-regression*. Sports Med Open, 2017. **3**(1): p. 19.
- 250 3. Powell, R., et al., *Is exercise-based cardiac rehabilitation effective? A systematic review and*  
 251 *meta-analysis to re-examine the evidence*. BMJ Open, 2018. **8**(3): p. e019656.
- 252 4. Dalal, H.M., et al., *The effects and costs of home-based rehabilitation for heart failure with*  
 253 *reduced ejection fraction: The REACH-HF multicentre randomized controlled trial*. Eur J Prev  
 254 *Cardiol*, 2019. **26**(3): p. 262-272.
- 255 5. Taylor, R.S., et al., *Exercise-Based Rehabilitation for Heart Failure: Cochrane Systematic*  
 256 *Review, Meta-Analysis, and Trial Sequential Analysis*. JACC Heart Fail, 2019. **7**(8): p. 691-705.
- 257 6. Sumner, J., S.L. Grace, and P. Doherty, *Predictors of Cardiac Rehabilitation Utilization in*  
 258 *England: Results From the National Audit*. J Am Heart Assoc, 2016. **5**(10).
- 259 7. Hinde, S., et al., *Improving cardiac rehabilitation uptake: Potential health gains by*  
 260 *socioeconomic status*. Eur J Prev Cardiol, 2019. **26**(17): p. 1816-1823.
- 261 8. NHS England., *The NHS Long Term Plan*. 2019: [https://www.longtermplan.nhs.uk/wp-](https://www.longtermplan.nhs.uk/wp-content/uploads/2019/01/nhs-long-term-plan.pdf)  
 262 [content/uploads/2019/01/nhs-long-term-plan.pdf](https://www.longtermplan.nhs.uk/wp-content/uploads/2019/01/nhs-long-term-plan.pdf) .
- 263 9. World Health Organisation. *Weekly operational update on COVID-19*. 2020 [cited 2020 7th  
 264 September]; Available from: [https://www.who.int/docs/default-](https://www.who.int/docs/default-source/coronaviruse/situation-reports/wou-4-september-2020-approved.pdf?sfvrsn=91215c78_4)  
 265 [source/coronaviruse/situation-reports/wou-4-september-2020-](https://www.who.int/docs/default-source/coronaviruse/situation-reports/wou-4-september-2020-approved.pdf?sfvrsn=91215c78_4)  
 266 [approved.pdf?sfvrsn=91215c78\\_4](https://www.who.int/docs/default-source/coronaviruse/situation-reports/wou-4-september-2020-approved.pdf?sfvrsn=91215c78_4).
- 267 10. Le NK, L.A., Brooks JP, Khetpal S, Liauw D, Izurieta R, et al., *Impact of government-imposed*  
 268 *social distancing measures on COVID-19 morbidity and mortality around the world*. 2020: Bull  
 269 World Health Organ.
- 270 11. Moroni, F., et al., *Collateral Damage: Medical Care Avoidance Behavior Among Patients With*  
 271 *Myocardial Infarction During the COVID-19 Pandemic*. JACC: Case Reports, 2020.
- 272 12. Garcia, S., et al., *Reduction in ST-Segment Elevation Cardiac Catheterization Laboratory*  
 273 *Activations in the United States During COVID-19 Pandemic*. J Am Coll Cardiol, 2020. **75**(22):  
 274 p. 2871-2872.
- 275 13. Anderson, L., et al., *Home-based versus centre-based cardiac rehabilitation*. Cochrane  
 276 Database Syst Rev, 2017. **6**: p. CD007130.
- 277 14. Turk-Adawi, K., et al., *Cardiac Rehabilitation Availability and Density around the Globe*.  
 278 EClinicalMedicine, 2019. **13**: p. 31-45.
- 279 15. British Heart Foundation. *The National Audit of Cardiac Rehabilitation: Quality and*  
 280 *Outcomes Report 2019*. 2019.
- 281 16. Mann, D.M., et al., *COVID-19 transforms health care through telemedicine: Evidence from*  
 282 *the field*. J Am Med Inform Assoc, 2020. **27**(7): p. 1132-1135.
- 283 17. Eysenbach, G., *Improving the quality of Web surveys: the Checklist for Reporting Results of*  
 284 *Internet E-Surveys (CHERRIES)*. J Med Internet Res, 2004. **6**(3): p. e34.
- 285 18. World Health Organisation Archived: *WHO Timeline - COVID-19*. 2020.
- 286 19. McGregor, G., et al., *Does contemporary exercise-based cardiac rehabilitation improve*  
 287 *quality of life for people with coronary artery disease? A systematic review and meta-*  
 288 *analysis*. BMJ Open, 2020. **10**(6): p. e036089.
- 289 20. Babu, A.S., et al., *COVID-19: A Time for Alternate Models in Cardiac Rehabilitation to Take*  
 290 *Centre Stage*. Can J Cardiol, 2020. **36**(6): p. 792-794.
- 291 21. Nichols, S., et al., *Current Insights into Exercise-based Cardiac Rehabilitation in Patients with*  
 292 *Coronary Heart Disease and Chronic Heart Failure*. Int J Sports Med, 2020.



1  
2  
3  
4  
5  
6  
7  
8  
9  
10  
11  
12  
13  
14  
15  
16  
17  
18  
19  
20  
21  
22  
23  
24  
25  
26  
27  
28  
29  
30  
31  
32  
33  
34  
35  
36  
37  
38  
39  
40  
41  
42  
43  
44  
45  
46  
47  
48  
49  
50  
51  
52  
53  
54  
55  
56  
57  
58  
59  
60

244 22. Strain, T., K. Wijndaele, and S. Brage, *Physical Activity Surveillance Through Smartphone*  
245 *Apps and Wearable Trackers: Examining the UK Potential for Nationally Representative*  
246 *Sampling*. JMIR Mhealth Uhealth, 2019. **7**(1): p. e11898.

For peer review only

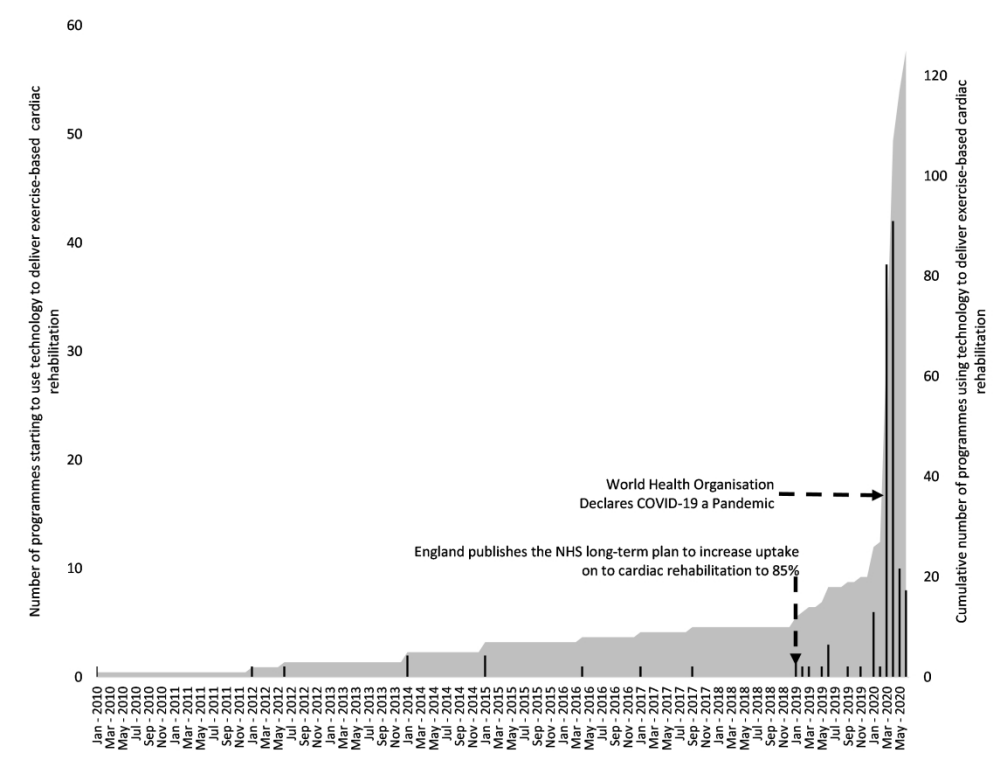

Figure 1 – Data showing the use of technology to deliver exercise-based cardiac rehabilitation between January 2010 and June 2020. Black bars indicate how many programmes started using their chosen technology, on a given date. The grey area shows the cumulative number of cardiac rehabilitation programmes using technology.

250x188mm (300 x 300 DPI)

1  
2  
3  
4  
5  
6  
7  
8  
9  
10  
11  
12  
13  
14  
15  
16  
17  
18  
19  
20  
21  
22  
23  
24  
25  
26  
27  
28  
29  
30  
31  
32  
33  
34  
35  
36  
37  
38  
39  
40  
41  
42  
43  
44  
45  
46  
47  
48  
49  
50  
51  
52  
53  
54  
55  
56  
57  
58  
59  
60

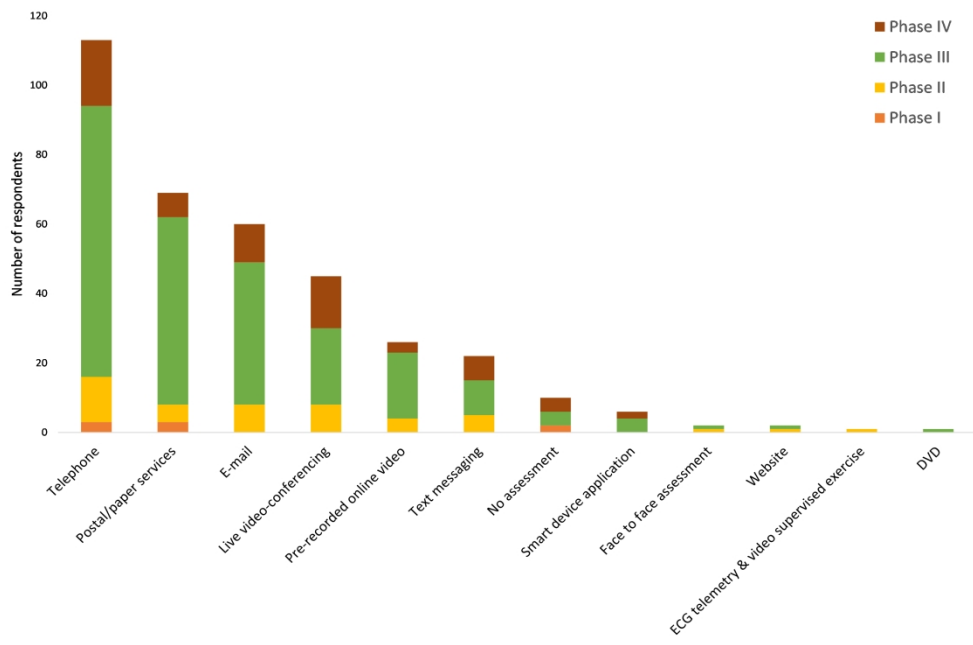

Figure 2 – Types of technology used to undertake baseline assessments. Orange bars indicate Phase I programmes, yellow bars indicate Phase II programmes, green lines indicate Phase III programmes, red bars indicate Phase IV programmes.

272x175mm (300 x 300 DPI)

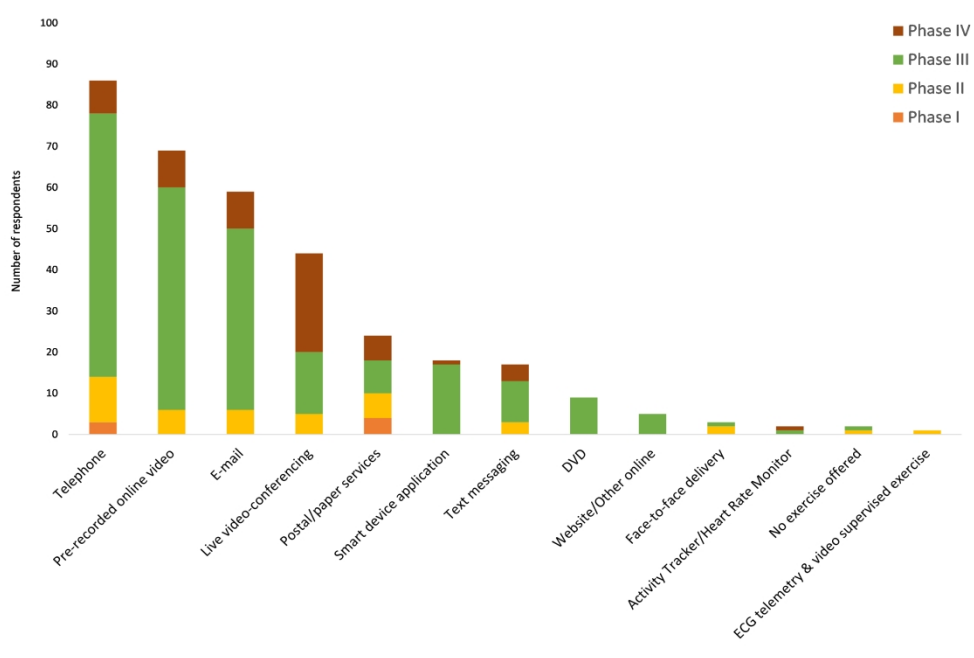

Figure 3 – Types of technology used to deliver the exercise component of cardiac rehabilitation. Orange bars indicate Phase I programmes, yellow bars indicate Phase II programmes, green lines indicate Phase III programmes, red bars indicate Phase IV programmes.

270x176mm (300 x 300 DPI)

1  
2  
3  
4  
5  
6  
7  
8  
9  
10  
11  
12  
13  
14  
15  
16  
17  
18  
19  
20  
21  
22  
23  
24  
25  
26  
27  
28  
29  
30  
31  
32  
33  
34  
35  
36  
37  
38  
39  
40  
41  
42  
43  
44  
45  
46

### Appendix 1 - Checklist for Reporting Results of Internet E-Surveys (CHERRIES)

| <b>Checklist Item</b>            | <b>Explanation</b>                                                                                                                                                                                                                                                                                                                                                                                                    | <b>Page Number</b> |
|----------------------------------|-----------------------------------------------------------------------------------------------------------------------------------------------------------------------------------------------------------------------------------------------------------------------------------------------------------------------------------------------------------------------------------------------------------------------|--------------------|
| Describe survey design           | Describe target population, sample frame. Is the sample a convenience sample? (In "open" surveys this is most likely.)                                                                                                                                                                                                                                                                                                | 5                  |
| IRB approval                     | Mention whether the study has been approved by an IRB.                                                                                                                                                                                                                                                                                                                                                                | 6                  |
| Informed consent                 | Describe the informed consent process. Where were the participants told the length of time of the survey, which data were stored and where and for how long, who the investigator was, and the purpose of the study?                                                                                                                                                                                                  | Appendix 2         |
| Data protection                  | If any personal information was collected or stored, describe what mechanisms were used to protect unauthorized access.                                                                                                                                                                                                                                                                                               | 5                  |
| Development and testing          | State how the survey was developed, including whether the usability and technical functionality of the electronic questionnaire had been tested before fielding the questionnaire.                                                                                                                                                                                                                                    | 5,6                |
| Open survey versus closed survey | An "open survey" is a survey open for each visitor of a site, while a closed survey is only open to a sample which the investigator knows (password-protected survey).                                                                                                                                                                                                                                                | 5                  |
| Contact mode                     | Indicate whether or not the initial contact with the potential participants was made on the Internet. (Investigators may also send out questionnaires by mail and allow for Web-based data entry.)                                                                                                                                                                                                                    | 6                  |
| Advertising the survey           | How/where was the survey announced or advertised? Some examples are offline media (newspapers), or online (mailing lists – If yes, which ones?) or banner ads (Where were these banner ads posted and what did they look like?). It is important to know the wording of the announcement as it will heavily influence who chooses to participate. Ideally the survey announcement should be published as an appendix. | 6, Appendix 3      |
| Web/E-mail                       | State the type of e-survey (eg, one posted on a Web site, or one sent out through e-mail). If it is an e-mail survey, were the responses entered manually into a database, or was there an automatic method for capturing responses?                                                                                                                                                                                  | 6                  |
| Context                          | Describe the Web site (for mailing list/newsgroup) in which the survey was posted. What is the Web site about, who is visiting it, what are visitors normally looking for? Discuss to what degree the content of the Web site could pre-select the sample or influence the results. For example, a                                                                                                                    | 6                  |

|                                                                  |                                                                                                                                                                                                                                                                                                                                                                                                                                                                                               |               |
|------------------------------------------------------------------|-----------------------------------------------------------------------------------------------------------------------------------------------------------------------------------------------------------------------------------------------------------------------------------------------------------------------------------------------------------------------------------------------------------------------------------------------------------------------------------------------|---------------|
|                                                                  | survey about vaccination on a anti-immunization Web site will have different results from a Web survey conducted on a government Web site                                                                                                                                                                                                                                                                                                                                                     |               |
| Mandatory/voluntary                                              | Was it a mandatory survey to be filled in by every visitor who wanted to enter the Web site, or was it a voluntary survey?                                                                                                                                                                                                                                                                                                                                                                    | 5             |
| Incentives                                                       | Were any incentives offered (eg, monetary, prizes, or non-monetary incentives such as an offer to provide the survey results)?                                                                                                                                                                                                                                                                                                                                                                | 6             |
| Time/Date                                                        | In what timeframe were the data collected?                                                                                                                                                                                                                                                                                                                                                                                                                                                    | 6             |
| Randomization of items or questionnaires                         | To prevent biases items can be randomized or alternated.                                                                                                                                                                                                                                                                                                                                                                                                                                      | N/A           |
| Adaptive questioning                                             | Use adaptive questioning (certain items, or only conditionally displayed based on responses to other items) to reduce number and complexity of the questions.                                                                                                                                                                                                                                                                                                                                 | N/A           |
| Number of Items                                                  | What was the number of questionnaire items per page? The number of items is an important factor for the completion rate.                                                                                                                                                                                                                                                                                                                                                                      | 6, Appendix 2 |
| Number of screens (pages)                                        | Over how many pages was the questionnaire distributed? The number of items is an important factor for the completion rate.                                                                                                                                                                                                                                                                                                                                                                    | 6             |
| Completeness check                                               | It is technically possible to do consistency or completeness checks before the questionnaire is submitted. Was this done, and if "yes", how (usually JavaScript)? An alternative is to check for completeness after the questionnaire has been submitted (and highlight mandatory items). If this has been done, it should be reported. All items should provide a non-response option such as "not applicable" or "rather not say", and selection of one response option should be enforced. | 6             |
| Review step                                                      | State whether respondents were able to review and change their answers (eg, through a Back button or a Review step which displays a summary of the responses and asks the respondents if they are correct).                                                                                                                                                                                                                                                                                   | 6             |
| Unique site visitor                                              | If you provide view rates or participation rates, you need to define how you determined a unique visitor. There are different techniques available, based on IP addresses or cookies or both.                                                                                                                                                                                                                                                                                                 | 6             |
| View rate (Ratio of unique survey visitors/unique site visitors) | Requires counting unique visitors to the first page of the survey, divided by the number of unique site visitors (not page views!). It is not unusual to have view rates of less than 0.1 % if the survey is voluntary.                                                                                                                                                                                                                                                                       | N/A           |

|                                              |                                                                                                                          |                                                                                                                                                                                                                                                                                                                                                                                                                                                                                                                                                                            |                                                                                                          |
|----------------------------------------------|--------------------------------------------------------------------------------------------------------------------------|----------------------------------------------------------------------------------------------------------------------------------------------------------------------------------------------------------------------------------------------------------------------------------------------------------------------------------------------------------------------------------------------------------------------------------------------------------------------------------------------------------------------------------------------------------------------------|----------------------------------------------------------------------------------------------------------|
| 1<br>2<br>3<br>4<br>5<br>6<br>7<br>8<br>9    | Participation rate<br>(Ratio of unique<br>visitors who agreed<br>to participate/unique<br>first survey page<br>visitors) | Count the unique number of people who filled in the first survey page (or agreed to participate, for example by checking a checkbox), divided by visitors who visit the first page of the survey (or the informed consents page, if present). This can also be called “recruitment” rate.                                                                                                                                                                                                                                                                                  | 7                                                                                                        |
| 10<br>11<br>12<br>13<br>14<br>15<br>16<br>17 | Completion rate<br>(Ratio of users who<br>finished the<br>survey/users who<br>agreed to<br>participate)                  | The number of people submitting the last questionnaire page, divided by the number of people who agreed to participate (or submitted the first survey page). This is only relevant if there is a separate “informed consent” page or if the survey goes over several pages. This is a measure for attrition. Note that “completion” can involve leaving questionnaire items blank. This is not a measure for how completely questionnaires were filled in. (If you need a measure for this, use the word “completeness rate”.)                                             | N/A – Because if<br>programmes<br>were cancelled<br>they weren’t<br>able to progress<br>to the end page. |
| 18<br>19<br>20<br>21<br>22<br>23             | Cookies used                                                                                                             | Indicate whether cookies were used to assign a unique user identifier to each client computer. If so, mention the page on which the cookie was set and read, and how long the cookie was valid. Were duplicate entries avoided by preventing users access to the survey twice; or were duplicate database entries having the same user ID eliminated before analysis? In the latter case, which entries were kept for analysis (eg, the first entry or the most recent)?                                                                                                   | N/A                                                                                                      |
| 24<br>25<br>26<br>27<br>28<br>29<br>30<br>31 | IP check                                                                                                                 | Indicate whether the IP address of the client computer was used to identify potential duplicate entries from the same user. If so, mention the period of time for which no two entries from the same IP address were allowed (eg, 24 hours). Were duplicate entries avoided by preventing users with the same IP address access to the survey twice; or were duplicate database entries having the same IP address within a given period of time eliminated before analysis? If the latter, which entries were kept for analysis (eg, the first entry or the most recent)? | 6                                                                                                        |
| 32<br>33                                     | Log file analysis                                                                                                        | Indicate whether other techniques to analyze the log file for identification of multiple entries were used. If so, please describe.                                                                                                                                                                                                                                                                                                                                                                                                                                        | N/A                                                                                                      |
| 34<br>35<br>36<br>37<br>38<br>39<br>40       | Registration                                                                                                             | In “closed” (non-open) surveys, users need to login first and it is easier to prevent duplicate entries from the same user. Describe how this was done. For example, was the survey never displayed a second time once the user had filled it in, or was the username stored together with the survey results and later eliminated? If the latter, which entries were kept for analysis (eg, the first entry or the most recent)?                                                                                                                                          | N/A                                                                                                      |

|                                                     |                                                                                                                                                                                                                                               |     |
|-----------------------------------------------------|-----------------------------------------------------------------------------------------------------------------------------------------------------------------------------------------------------------------------------------------------|-----|
| Handling of incomplete questionnaires               | Were only completed questionnaires analyzed? Were questionnaires which terminated early (where, for example, users did not go through all questionnaire pages) also analyzed?                                                                 | 6   |
| Questionnaires submitted with an atypical timestamp | Some investigators may measure the time people needed to fill in a questionnaire and exclude questionnaires that were submitted too soon. Specify the timeframe that was used as a cut-off point, and describe how this point was determined. | 6   |
| Statistical correction                              | Indicate whether any methods such as weighting of items or propensity scores have been used to adjust for the non-representative sample; if so, please describe the methods.                                                                  | N/A |

This checklist has been modified from Eysenbach G. Improving the quality of Web surveys: the Checklist for Reporting Results of Internet E-Surveys (CHERRIES). J Med Internet Res. 2004 Sep 29;6(3):e34 [erratum in J Med Internet Res. 2012; 14(1): e8.]. Article available at <https://www.jmir.org/2004/3/e34/>; erratum available <https://www.jmir.org/2012/1/e8/>. Copyright ©Gunther Eysenbach. Originally published in the [Journal of Medical Internet Research](https://www.jmir.org/2004/3/e34/), 29.9.2004 and 04.01.2012.

This is an open-access article distributed under the terms of the Creative Commons Attribution License (<https://creativecommons.org/licenses/by/2.0/>), which permits unrestricted use, distribution, and reproduction in any medium, provided the original work, first published in the Journal of Medical Internet Research, is properly cited.



## Appendix 2 - Electronic survey

# Using technology to deliver the exercise component of cardiac rehabilitation

---

### Start of Block: Default Question Block

Background Information Cardiac Rehabilitation is a vital treatment for patients recovering from a cardiac event. Exercise is a core component of a comprehensive cardiac rehabilitation programme, however, the outbreak of Covid-19 has meant that patients in many countries can no longer attend assessments and exercise classes in person. As a consequence, healthcare services have had to adopt new ways of working to ensure that their patients continue to receive cardiac rehabilitation services. Anecdotal evidence suggests that some cardiac rehabilitation services have begun using technology to deliver their assessments, physical activity advice, and/or exercise programmes remotely. The Covid-19 outbreak may therefore represent a step-change in services capacity to use the technology when the disease is brought under control. This may provide an opportunity to increase participation in cardiac rehabilitation among those who are unable or unwilling to travel to centre-based cardiac rehabilitation. This brief survey is designed to help the British Association for Cardiovascular Prevention and Rehabilitation understand if, or how, technology is being used to deliver the exercise component of cardiac rehabilitation. It will also capture professional experiences of using technology to deliver exercise-based cardiac rehabilitation and obtain an estimate of the patient demographic that are engaging with alternative delivery methods of cardiac rehabilitation.

---

Page Break

1  
2  
3  
4  
5 Thank you for taking the time to complete our brief survey. It should take approximately 10 minutes  
6 to complete. We have asked you to complete this survey because you are involved in the delivery of  
7 exercise-based cardiac rehabilitation and we want to understand how your practice has changed in  
8 relation to the COVID-19 outbreak. By proceeding to the next page of the survey you are providing  
9 consent to take part in the study. Only information that is essential to answer our research question  
10 will be collected. Any information collected will be helpful, and will be processed in accordance with  
11 the General Data Protection Regulation (2018). If you would like to withdraw from the study, just  
12 exit the web page. We will keep the responses you have provide even if you don't complete the  
13 whole survey. If you would like any information about data protection or the study, please contact:  
14 Dr Simon Nichols Advanced Wellbeing Research Centre Collegiate Hall Collegiate Crescent  
15 Sheffield Hallam University S10 2BP s.j.nichols@shu.ac.uk  
16  
17  
18

19  
20  Next page (1)  
21  
22

23  
24  
25 Page Break  
26  
27  
28  
29  
30  
31  
32  
33  
34  
35  
36  
37  
38  
39  
40  
41  
42  
43  
44  
45  
46  
47  
48  
49  
50  
51  
52  
53  
54  
55  
56  
57  
58  
59  
60

1  
2  
3  
4  
5 Screening Q Have you previously completed this questionnaire?  
6  
7

8  Yes (1)  
9

10  No (2)  
11  
12  
13

14 Q1 Which phase of cardiac rehabilitation do you work in: (please tick the phase which you spend  
15 most of your time)  
16

17  Phase I (1)  
18

19  Phase II (2)  
20

21  Phase III (3)  
22

23  Phase IV (4)  
24  
25  
26  
27  
28  
29  
30

31  
32  
33 Q2 Which country do you work in?  
34

35  England (1)  
36

37  Northern Ireland (2)  
38

39  Scotland (3)  
40

41  Wales (4)  
42

43  Non-UK (please state) (5) \_\_\_\_\_  
44  
45  
46  
47  
48  
49  
50

51  
52  
53 Page Break \_\_\_\_\_  
54  
55  
56  
57  
58  
59  
60

1  
2  
3  
4  
5 Q3 Have you continued to provide exercise-based cardiac rehabilitation services during the COVID-  
6 19 outbreak?  
7  
8

- 9  Yes – We are able to see as many patients as we did before the COVID-19 outbreak (1)  
10  
11  Yes – But we aren't able to see as many patients as we did before the COVID-19 outbreak  
12 (2)  
13  
14  No – All services have been cancelled/there are no staff to run our programmes (3)  
15  
16  
17  
18  
19
- 

20  
21  
22 Q4 Since the COVID-19 outbreak, has your service found that:  
23  
24

- 25  The same number of patients are accessing exercise-based cardiac rehabilitation (1)  
26  
27  Fewer patients are accessing exercise-based cardiac rehabilitation (2)  
28  
29  No patients are accessing exercise-based cardiac rehabilitation (3)  
30  
31  
32  
33  
34
- 

35  
36 Page Break  
37  
38  
39  
40  
41  
42  
43  
44  
45  
46  
47  
48  
49  
50  
51  
52  
53  
54  
55  
56  
57  
58  
59  
60

1  
2  
3  
4  
5 Q5 Are the patients you are currently treating representative of the patients you would treat under  
6 normal circumstances, with respect to ethnicity?  
7

8  No - my patient population is less diverse (1)  
9

10  
11  Yes - my patient population is as diverse as normal (2)  
12

13  
14  No - my patient population is more diverse (3)  
15  
16

17  
18  
19  
20  
21  
22 Q6 Only answer this question if you are a UK centre. Approximately what percentage of the patients  
23 you saw in the last 7 days were White British?  
24

25 0 10 20 30 40 50 60 70 80 90 100

26  
27  
28 % of patients who were White British ( )  
29

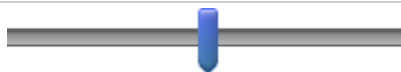

30  
31  
32  
33  
34  
35 Page Break  
36  
37  
38  
39  
40  
41  
42  
43  
44  
45  
46  
47  
48  
49  
50  
51  
52  
53  
54  
55  
56  
57  
58  
59  
60

1  
2  
3  
4  
5 Q7 Are the patients you are currently treating representative of the patients you would treat under  
6 normal circumstances, with respect to age?  
7

- 8  
9  No - my patient population is younger (1)  
10  
11  Yes - the age group of my patients is similar to normal (2)  
12  
13  No - my patient population is older (3)  
14  
15  
16

17  
18  
19  
20  
21 Q8 Approximately what percentage of the patients you saw in the last 7 days were over 65 years  
22 old?  
23

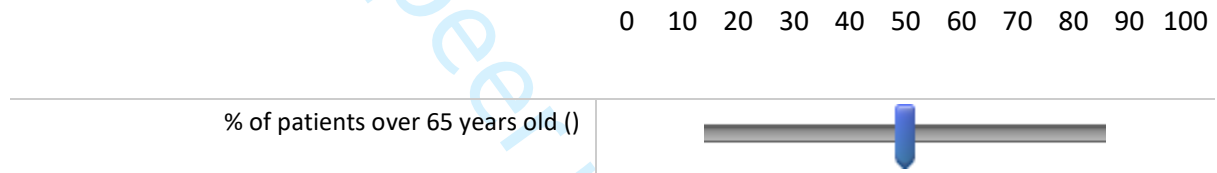

34  
35 Page Break  
36  
37  
38  
39  
40  
41  
42  
43  
44  
45  
46  
47  
48  
49  
50  
51  
52  
53  
54  
55  
56  
57  
58  
59  
60

1  
2  
3  
4  
5 Q9 Are the patients you are currently treating representative of the patients you would treat under  
6 normal circumstances, with respect to female participation?  
7

- 8  
9  No - the proportion of female participants is smaller (1)  
10  
11  Yes - the proportion of female participants is the same (2)  
12  
13  
14  No - the proportion of female participants is larger (3)  
15  
16  
17
- 

18  
19  
20  
21 Q10 Are the patients you are currently treating representative of the patients you would treat under  
22 normal circumstances, with respect to male participation?  
23

- 24  
25  No - the proportion of male participants is smaller (1)  
26  
27  Yes - the proportion of male participants is the same (2)  
28  
29  
30  No - the proportion of male participants is larger (3)  
31  
32  
33
- 

34  
35  
36  
37 Q11 Approximately what percentage of the patients you saw in the last 7 days were female?

38  
39  
40 0 10 20 30 40 50 60 70 80 90 100

41  
42  
43 % Female ( )  
44  
45  
46  
47  
48  
49



50 Page Break  
51  
52  
53  
54  
55  
56  
57  
58  
59  
60

1  
2  
3  
4  
5 Q12 Are you using any of the following technology to deliver a cardiac rehabilitation exercise  
6 assessment? (tick all that apply)  
7

8  Paper/postal services (1)  
9

10  Telephone (2)  
11

12  Text messaging (3)  
13

14  E-mail (4)  
15

16  Recorded video e.g. YouTube (5)  
17

18  Live video conferencing e.g. Zoom, Skype, Microsoft Teams, Facebook (6)  
19

20  Other (please state) (7) \_\_\_\_\_  
21  
22

23  
24  
25  
26  
27  
28  
29  
30  
31  
32  
33 Q13 How are you assessing functional capacity during your assessment? (tick all that apply)  
34

35  I am not assessing functional capacity (1)  
36

37  Self-reported fitness (2)  
38

39  Duke Activity Status Index/Other questionnaire (3)  
40

41  Step count from patients own physical activity tracker (4)  
42

43  Remotely supervised exercise test (please state which test) (5)  
44  
45 \_\_\_\_\_  
46

47  Other (please state) (6) \_\_\_\_\_  
48  
49  
50  
51  
52  
53  
54  
55  
56  
57  
58  
59  
60



1  
2  
3 Q14 Are you using any of the following technology to deliver the physical activity/exercise  
4 component of cardiac rehabilitation? (tick all that apply)  
5

6  Paper/postal services (1)  
7

8  Telephone (2)  
9

10  Text messaging (3)  
11

12  E-mail (4)  
13

14  Recorded video e.g. YouTube (5)  
15

16  Live video conferencing e.g. Zoom, Skype, Microsoft Teams, Facebook (6)  
17

18  Other (please state) (7) \_\_\_\_\_  
19  
20  
21  
22  
23  
24

25  
26  
27  
28  
29  
30 Page Break \_\_\_\_\_  
31  
32  
33  
34  
35  
36  
37  
38  
39  
40  
41  
42  
43  
44  
45  
46  
47  
48  
49  
50  
51  
52  
53  
54  
55  
56  
57  
58  
59  
60

1  
2  
3  
4  
5 Q15 Did you use this technology before the COVID-19 restrictions?  
6  
7

8  Yes (1)  
9

10  No (2)  
11  
12  
13

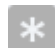

17  
18  
19 Q16 On approximately what date did you start using this technology?  
20  
21

22 \_\_\_\_\_  
23  
24 -----  
25

26  
27 Q17 If you used remote technology before the COVID-19 restrictions, have you found that:  
28  
29

30  The same number of patients are accessing exercise-based cardiac rehabilitation using  
31 technology (1)  
32

33  Fewer patients are accessing exercise-based cardiac rehabilitation using technology (2)  
34  
35

36  No patients are accessing exercise-based cardiac rehabilitation using technology (3)  
37  
38  
39  
40 -----  
41

42 Page Break \_\_\_\_\_  
43  
44  
45  
46  
47  
48  
49  
50  
51  
52  
53  
54  
55  
56  
57  
58  
59  
60

1  
2  
3  
4  
5 Q18 Are you able to use technology to deliver exercise-based cardiac rehabilitation to: (tick all that  
6 apply)  
7

8  Low risk patients (1)  
9

10  
11  Moderate risk patients (2)  
12

13  
14  High risk patients (3)  
15  
16

17  
18  
19  
20  
21  
22 Q19 I am able to offer physical activity recommendations to patients that have not had an  
23 assessment in person? (i.e. in the same room as the assessor)  
24

25  Yes (1)  
26

27  
28  No (2)  
29  
30

31  
32  
33  
34  
35 Q20 I am able to offer an exercise prescription to patients that have not had an assessment in  
36 person? (i.e. in the same room as the assessor)  
37

38  
39  Yes (1)  
40

41  
42  No (2)  
43  
44

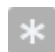

48  
49  
50  
51 Q21 Can you briefly describe what kind of physical activity recommendations you are making and/or  
52 exercises you are prescribing?  
53

54 Examples may include chair-based exercise, resistance bands, walking, running on the spot and body  
55 weight exercises.  
56

57  
58 \_\_\_\_\_  
59 \_\_\_\_\_  
60

1  
2  
3  
4  
5  
6  
7  
8  
9  
10  
11  
12  
13  
14  
15  
16  
17  
18  
19  
20  
21  
22  
23  
24  
25  
26  
27  
28  
29  
30  
31  
32  
33  
34  
35  
36  
37  
38  
39  
40  
41  
42  
43  
44  
45  
46  
47  
48  
49  
50  
51  
52  
53  
54  
55  
56  
57  
58  
59  
60

---

---

---

-----  
Page Break

---

For peer review only

1  
2  
3  
4  
5 Q22 How many supervised physical activity/exercise training sessions can a patient attend, each  
6 week?  
7  
8

9 \_\_\_\_\_  
10  
11 -----  
12  
13

14 Q23 Are the physical activity/exercise sessions you are supervising: (tick all that apply)  
15

16  Group exercise (1)  
17  
18

19  One-on-one (2)  
20  
21  
22  
23  
24 -----  
25

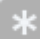

26  
27  
28 Q24 How long is each supervised physical activity/exercise session? Please provide your answer in  
29 minutes.  
30  
31

32 \_\_\_\_\_  
33  
34 -----  
35

36 Page Break \_\_\_\_\_  
37  
38  
39  
40  
41  
42  
43  
44  
45  
46  
47  
48  
49  
50  
51  
52  
53  
54  
55  
56  
57  
58  
59  
60

1  
2  
3  
4  
5  
6  
7  
8  
9  
10  
11  
12  
13  
14  
15  
16  
17  
18  
19  
20  
21  
22  
23  
24  
25  
26  
27  
28  
29  
30  
31  
32  
33  
34  
35  
36  
37  
38  
39  
40  
41  
42  
43  
44  
45  
46  
47  
48  
49  
50  
51  
52  
53  
54  
55  
56  
57  
58  
59  
60  
\*

Q25 How many unsupervised physical activity/exercise training sessions are you prescribing for a patient, each week?

---

\*  
For peer review only

Q26 How long is each unsupervised physical activity/exercise session? Please provide your answer in minutes.

---

Page Break

---

1  
2  
3  
4  
5 Q27 What intensity range do you recommend/prescribe? (tick all that apply)  
6  
7  
8  
9

10  
11  Low (e.g. RPE 11) (1)  
12

13  
14  Moderate (e.g. RPE 13) (2)  
15

16  
17  High (e.g. RPE 15) (3)  
18  
19  
20  
21

---

22  
23  
24 Q28 Is this intensity: (Tick one option only)  
25

26  
27  Lower than normal (1)  
28

29  
30  The same as normal (2)  
31

32  
33  Higher than normal (3)  
34  
35  
36

---

37 Page Break  
38  
39  
40  
41  
42  
43  
44  
45  
46  
47  
48  
49  
50  
51  
52  
53  
54  
55  
56  
57  
58  
59  
60

1  
2  
3  
4  
5 29 Do you think that the programmes you are providing are: (Tick one option only)  
6  
7

8  More effective than normal (1)  
9

10  As effective as normal (2)  
11  
12

13  Less effective than normal (3)  
14  
15  
16

17 -----  
18 Page Break  
19  
20  
21  
22  
23  
24  
25  
26  
27  
28  
29  
30  
31  
32  
33  
34  
35  
36  
37  
38  
39  
40  
41  
42  
43  
44  
45  
46  
47  
48  
49  
50  
51  
52  
53  
54  
55  
56  
57  
58  
59  
60



1  
2  
3  
4  
5 Q30 What barriers have you encountered when using technology to deliver cardiac rehabilitation?  
6 (tick all that apply)  
7

- 8  No barriers (1)  
9  
10  
11  Patients have no internet connection (2)  
12  
13  
14  Patients do not have access to computers/tablets/smart phone (3)  
15  
16  
17  Patients are not confident in using technology (4)  
18  
19  
20  Patients are concerned about personal safety (5)  
21  
22  
23  Patient lack of interest in receiving services using technology (6)  
24  
25  
26  My Trust/Health Board /employer do not support the delivery of health services using  
27 technology (7)  
28  
29  
30  Internet security and patient confidentiality concerns (8)  
31  
32  
33  Professionals are not confident in delivering services using technology (9)  
34  
35  
36  Professionals are concerned about patient safety (10)  
37  
38  
39  Other (please specify) (11) \_\_\_\_\_  
40  
41  
42  
43

44  
45 Page Break \_\_\_\_\_  
46  
47  
48  
49  
50  
51  
52  
53  
54  
55  
56  
57  
58  
59  
60

1  
2  
3  
4  
5 Q31 How many adverse events resulting in minor injury have been reported since you have started  
6 delivering cardiac rehabilitation remotely? Please only report incidents that are related to  
7 exercise-based cardiac rehabilitation.  
8  
9

10 \_\_\_\_\_  
11  
12 -----  
13  
14 Page Break \_\_\_\_\_  
15  
16  
17  
18  
19  
20  
21  
22  
23  
24  
25  
26  
27  
28  
29  
30  
31  
32  
33  
34  
35  
36  
37  
38  
39  
40  
41  
42  
43  
44  
45  
46  
47  
48  
49  
50  
51  
52  
53  
54  
55  
56  
57  
58  
59  
60

For peer review only

1  
2  
3  
4  
5  
6  
7  
8  
9  
10  
11  
12  
13  
14  
15  
16  
17  
18  
19  
20  
21  
22  
23  
24  
25  
26  
27  
28  
29  
30  
31  
32  
33  
34  
35  
36  
37  
38  
39  
40  
41  
42  
43  
44  
45  
46  
47  
48  
49  
50  
51  
52  
53  
54  
55  
56  
57  
58  
59  
60

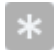

Q32 How many adverse events resulting in life changing injury have been reported since you have started delivering cardiac rehabilitation remotely? Please only report incidents that are related to exercise-based cardiac rehabilitation.

---

Page Break

For peer review only

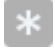

Q33 How many adverse events resulting in death have been reported since you have started delivering cardiac rehabilitation remotely? Please only report incidents that are related to exercise-based cardiac rehabilitation.

---

Page Break

---

For peer review only

1  
2  
3  
4  
5  
6  
7  
8  
9  
10  
11  
12  
13  
14  
15  
16  
17  
18  
19  
20  
21  
22  
23  
24  
25  
26  
27  
28  
29  
30  
31  
32  
33  
34  
35  
36  
37  
38  
39  
40  
41  
42  
43  
44  
45  
46  
47  
48  
49  
50  
51  
52  
53  
54  
55  
56  
57  
58  
59  
60

Q34 Do you think that the way you are using technology now should be an option for patients in your future standard practice?

- Yes (1)
- No (2)

-----  
Page Break

---

For peer review only

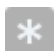

Q35 Is there anything else you would like to tell us about your experience or approaches to delivering exercise-based cardiac rehabilitation using remote technology? (500 characters max)

---

---

---

---

---

End of Block: Default Question Block

---

For peer review only

### Appendix 3 - Recruitment material

Appendix 3a - E-mail to BACPR members on 2<sup>nd</sup> and 25<sup>th</sup> of June 2020

BACPR Survey - Use of remote technology to deliver the exercise component of cardiac rehabilitation.

Dear Member,

The outbreak of Covid-19 has meant that patients in many countries can no longer attend assessments and exercise classes in person. As a consequence, many healthcare services have had to adopt new ways of working to ensure that their patients continue to receive cardiac rehabilitation services. Anecdotal evidence suggests that some cardiac rehabilitation services have begun to use technology to deliver their assessments, physical activity advice, and/or exercise programmes, remotely. The Covid-19 outbreak may therefore represent a step-change in services capacity to use the technology when the disease is brought under control. This may provide an opportunity to increase participation in cardiac rehabilitation among those who are unable or unwilling to travel to centre-based cardiac rehabilitation, in the long-term.

To help improve the provision of cardiac rehabilitation in the future, we would be extremely grateful if you could take 10 minutes to complete a brief survey which will help the British Association for Cardiovascular Prevention and Rehabilitation understand if, or how, technology is being used to deliver the exercise component of cardiac rehabilitation. It will also capture your professional experiences of using technology to deliver exercise-based cardiac rehabilitation and obtain an estimate of the patient demographic that are engaging with alternative delivery methods of cardiac rehabilitation. The findings of the study will be disseminated through the BACPR as well as conferences, scientific publications, and if appropriate, training courses.

The survey can be completed on a desktop computer or a smart phone, and will take approximately 10 minutes. To proceed to the survey, [click here](#).

Thank you for taking the time to consider taking part in this study.

Best wishes

Dr Simon Nichols

1  
2  
3 Simon Nichols  
4  
5

6  
7 BACPR Scientific Chair

8  
9 British Association for Cardiovascular Prevention & Rehabilitation

10  
11 c/o BCS, 9 Fitzroy Square,

12  
13 London

14  
15 W1T 5HW

16  
17 www.bacpr.com  
18  
19  
20  
21

22 **Appendix 3b - Example Twitter advert posted on Twitter by the study authors on June 3<sup>rd</sup> 2020**  
23  
24

25  
26 RT #COVID19 is an unprecedented challenge to #cardiacrehab Please tell us if/how you are using  
27 technology to deliver the exercise component of CR by completing this 10 minute survey Down  
28 pointing backhand index

29 [https://shusls.eu.qualtrics.com/jfe/form/SV\\_eEgCIDLGhsAE7Fr?Q\\_CHL=social&Q\\_SocialSource=twitter](https://shusls.eu.qualtrics.com/jfe/form/SV_eEgCIDLGhsAE7Fr?Q_CHL=social&Q_SocialSource=twitter)  
30 er @bacpr @A\_ODoherty @susandawkes @aynsleycowie @drtom\_butler @SHU\_PAWPH  
31  
32  
33  
34  
35

36 Example advert posted by the BACPR Exercise Instructor Network on their Facebook page, on 8<sup>th</sup>  
37 June 2020  
38  
39  
40

41 **Appendix 3c - Calling all BACPR Members please check your email inboxes!!**  
42

43 We would greatly appreciate your help in completing our survey regarding the use of remote  
44 technology to deliver the exercise component of Cardiac Rehab. The findings of this study will be  
45 disseminated through the BACPR, conferences & scientific publications.  
46  
47  
48  
49  
50  
51  
52  
53  
54  
55  
56  
57  
58  
59  
60



# BMJ Open

## A BACPR survey evaluating the use of technology in cardiac rehabilitation during the COVID-19 pandemic: insights for future practice

|                                 |                                                                                                                                                                                                                                                                                                                                                                                                                                                                                                                                                                                                                                                                                                                                                                                                        |
|---------------------------------|--------------------------------------------------------------------------------------------------------------------------------------------------------------------------------------------------------------------------------------------------------------------------------------------------------------------------------------------------------------------------------------------------------------------------------------------------------------------------------------------------------------------------------------------------------------------------------------------------------------------------------------------------------------------------------------------------------------------------------------------------------------------------------------------------------|
| Journal:                        | <i>BMJ Open</i>                                                                                                                                                                                                                                                                                                                                                                                                                                                                                                                                                                                                                                                                                                                                                                                        |
| Manuscript ID                   | bmjopen-2020-046051.R1                                                                                                                                                                                                                                                                                                                                                                                                                                                                                                                                                                                                                                                                                                                                                                                 |
| Article Type:                   | Original research                                                                                                                                                                                                                                                                                                                                                                                                                                                                                                                                                                                                                                                                                                                                                                                      |
| Date Submitted by the Author:   | 18-Feb-2021                                                                                                                                                                                                                                                                                                                                                                                                                                                                                                                                                                                                                                                                                                                                                                                            |
| Complete List of Authors:       | O'Doherty, Alasdair; Northumbria University, Department of Sport, Exercise and Rehabilitation<br>Humphreys, Helen; Sheffield Hallam University, Sport and Physical Activity Research Centre; Sheffield Hallam University, Advanced Wellbeing Research Centre<br>Dawkes, Susan; Edinburgh Napier University,<br>Cowie, Aynsley ; University Hospital Crosshouse, Cardiac Rehabilitation<br>Hinton, Sally; British Association for Cardiovascular Prevention and Rehabilitation<br>Brubaker, Peter; Wake Forest University, Department of Health and Exercise Science<br>Butler, Tom; Edge Hill University Faculty of Health and Social Care<br>Nichols, Simon; Sheffield Hallam University, Sport and Physical Activity Research Group; Sheffield Hallam University, Advanced Wellbeing Research Centre |
| <b>Primary Subject Heading</b>: | Cardiovascular medicine                                                                                                                                                                                                                                                                                                                                                                                                                                                                                                                                                                                                                                                                                                                                                                                |
| Secondary Subject Heading:      | Rehabilitation medicine, Sports and exercise medicine, Public health, Health services research, Cardiovascular medicine                                                                                                                                                                                                                                                                                                                                                                                                                                                                                                                                                                                                                                                                                |
| Keywords:                       | REHABILITATION MEDICINE, Telemedicine < BIOTECHNOLOGY & BIOINFORMATICS, COVID-19, Adult cardiology < CARDIOLOGY                                                                                                                                                                                                                                                                                                                                                                                                                                                                                                                                                                                                                                                                                        |
|                                 |                                                                                                                                                                                                                                                                                                                                                                                                                                                                                                                                                                                                                                                                                                                                                                                                        |

SCHOLARONE™  
Manuscripts

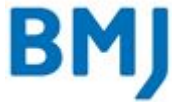

I, the Submitting Author has the right to grant and does grant on behalf of all authors of the Work (as defined in the below author licence), an exclusive licence and/or a non-exclusive licence for contributions from authors who are: i) UK Crown employees; ii) where BMJ has agreed a CC-BY licence shall apply, and/or iii) in accordance with the terms applicable for US Federal Government officers or employees acting as part of their official duties; on a worldwide, perpetual, irrevocable, royalty-free basis to BMJ Publishing Group Ltd ("BMJ") its licensees and where the relevant Journal is co-owned by BMJ to the co-owners of the Journal, to publish the Work in this journal and any other BMJ products and to exploit all rights, as set out in our [licence](#).

The Submitting Author accepts and understands that any supply made under these terms is made by BMJ to the Submitting Author unless you are acting as an employee on behalf of your employer or a postgraduate student of an affiliated institution which is paying any applicable article publishing charge ("APC") for Open Access articles. Where the Submitting Author wishes to make the Work available on an Open Access basis (and intends to pay the relevant APC), the terms of reuse of such Open Access shall be governed by a Creative Commons licence – details of these licences and which [Creative Commons](#) licence will apply to this Work are set out in our licence referred to above.

Other than as permitted in any relevant BMJ Author's Self Archiving Policies, I confirm this Work has not been accepted for publication elsewhere, is not being considered for publication elsewhere and does not duplicate material already published. I confirm all authors consent to publication of this Work and authorise the granting of this licence.

1  
2  
3 **1 A BACPR survey evaluating the use of technology in cardiac rehabilitation during the COVID-19**  
4 **2 pandemic: insights for future practice**  
5  
6  
7 3

8 4 Alasdair F. O'Doherty<sup>1</sup>, Helen Humphreys<sup>2,3</sup>, Susan Dawkes<sup>4,5</sup>, Aynsley Cowie<sup>6,5</sup>, Sally Hinton<sup>5</sup>, Peter  
9 5 Brubaker<sup>7</sup>, Tom Butler<sup>8,5</sup>, Simon Nichols<sup>2,3,5\*</sup>  
10  
11 6

12  
13 7 <sup>1</sup>Department of Sport Exercise and Rehabilitation, Northumbria University, Newcastle upon Tyne NE1  
14 8 8QH, United Kingdom, [alasdair.odoherty@northumbria.ac.uk](mailto:alasdair.odoherty@northumbria.ac.uk)  
15  
16

17 9 <sup>2</sup>Advanced Wellbeing Research Centre, Sheffield Hallam University, Sheffield, S9 3TY, United Kingdom,  
18 10 [H.Humphreys@shu.ac.uk](mailto:H.Humphreys@shu.ac.uk); [s.j.nichols@shu.ac.uk](mailto:s.j.nichols@shu.ac.uk)  
19  
20

21 11 <sup>3</sup>Sport and Physical Activity Research Centre, Sheffield Hallam University, Sheffield, S10 2BP, United  
22 12 Kingdom, [H.Humphreys@shu.ac.uk](mailto:H.Humphreys@shu.ac.uk); [s.j.nichols@shu.ac.uk](mailto:s.j.nichols@shu.ac.uk)  
23  
24

25 13 <sup>4</sup>School of Health and Social Care, Edinburgh Napier University, Edinburgh, EH11 4BN, United  
26 14 Kingdom, [s.dawkes@napier.ac.uk](mailto:s.dawkes@napier.ac.uk)  
27  
28

29 15 <sup>5</sup>British Association for Cardiovascular Prevention and Rehabilitation, Farnham, GU9 8BB, United  
30 16 Kingdom, [shinton@bacpr.com](mailto:shinton@bacpr.com)  
31  
32

33 17 <sup>6</sup>University Hospital Crosshouse, NHS Ayrshire & Arran, Kilmarnock, KA2 OBE, United Kingdom,  
34 18 [aynsleycowie@nhs.net](mailto:aynsleycowie@nhs.net)  
35  
36

37 19 <sup>7</sup>Department of Health and Exercise Science, Wake Forest University, Winston-Salem, NC 27109,  
38 20 United States of America, [brubaker@wfu.edu](mailto:brubaker@wfu.edu)  
39  
40

41 21 <sup>8</sup>Faculty of Health, Social Care and Medicine, Edge Hill University, Ormskirk, United Kingdom,  
42 22 [butlert@edgehill.ac.uk](mailto:butlert@edgehill.ac.uk)  
43  
44

45 23  
46  
47 24 \*Corresponding author – Dr Simon Nichols: e-mail [s.j.nichols@shu.ac.uk](mailto:s.j.nichols@shu.ac.uk); tel 01142 254327  
48  
49  
50  
51  
52

53 27 **Words – 3325**  
54  
55  
56  
57  
58  
59  
60

1  
2  
3 30 **Abstract**  
4  
5

6 31 **Objective:** To investigate whether exercise-based cardiac rehabilitation services continued during the  
7  
8 32 COVID-19 pandemic, and investigate how technology has been used to deliver home-based cardiac  
9  
10 33 rehabilitation.  
11  
12

13 34 **Design:** A mixed methods survey, including questions about exercise-based cardiac rehabilitation  
14  
15 35 service provision, programme diversity, patient complexity, technology use, barriers to using  
16  
17 36 technology, and safety.  
18  
19

20  
21 37 **Setting:** International survey of exercise-based cardiac rehabilitation programmes  
22  
23

24 38 **Participants:** Healthcare professionals working in exercise-based cardiac rehabilitation programmes,  
25  
26 39 worldwide.  
27  
28

29 40 **Main outcome measures:** The proportion of programmes that continued providing exercise-based  
30  
31 41 cardiac rehabilitation, and which technologies had been used to deliver home-based cardiac  
32  
33 42 rehabilitation.  
34  
35

36 43 **Results:** Three-hundred and thirty eligible responses were received; 89.7% were from the UK.  
37  
38 44 Approximately half (49.3%) of respondents reported that CR programmes were suspended due to  
39  
40 45 COVID-19. Of programmes that continued; 25.8% used technology before the COVID-19 pandemic.  
41  
42 46 Programmes typically started using technology within 19 days of COVID-19 becoming a pandemic.  
43  
44 47 48.8% did not provide CR to high-risk patients, telephone was most commonly used to deliver CR, and  
45  
46 48 some centres used sophisticated technology such as teleconferencing.  
47  
48

49 49 **Conclusions:** The rapid adoption of technology into standard practice is promising and may improve  
50  
51 50 accessibility, or participation, in exercise-based CR beyond COVID-19. However, the exclusion of  
52  
53 51 certain patient groups and programme suspension, could worsen clinical symptoms and wellbeing,  
54  
55 52 and increase hospital admissions. Refinement of current practices, with a focus on improving  
56  
57  
58  
59  
60

1  
2  
3 53 inclusivity and addressing safety concerns around exercise support to high-risk patients, may be  
4  
5 54 needed.  
6  
7  
8 55  
9  
10  
11 56  
12  
13  
14 57  
15  
16  
17 58  
18  
19  
20 59  
21  
22  
23 60  
24  
25  
26 61  
27  
28  
29 62  
30  
31  
32 63  
33  
34  
35 64  
36  
37  
38 65  
39  
40  
41 66  
42  
43  
44 67  
45  
46  
47 68  
48  
49  
50  
51  
52 70  
53  
54  
55 71  
56  
57  
58 72  
59  
60

For peer review only

1  
2  
3 73 **Abstract: 233 Words**  
4  
5

6 74 **Key words: Cardiac rehabilitation, COVID-19, Telehealth, Exercise training,**  
7  
8

9 75  
10  
11

12 76 **Article Summary**  
13

14  
15 77 **Strengths and limitations of this study**  
16

17  
18 78 • This is the first international reporting on the effect that COVID-19 restrictions have had on  
19  
20 79 exercise-based cardiac rehabilitation.

21  
22 80 • We report data from  $n=330$  cardiac rehabilitation programmes around the world, although  
23  
24 81 the majority of data were from the United Kingdom.

25  
26 82 • Our mixed methods survey enabled us to investigate how technology has been used to deliver  
27  
28 83 exercise-based cardiac rehabilitation, as well the barriers to using technology.

29  
30 84 • Respondents were only able to complete the survey once, but we could have received more  
31  
32 85 than one response from professionals working in a single cardiac rehabilitation programme.

33  
34 86 • Our data could be used to inform future research agendas, international healthcare policy,  
35  
36 87 and local healthcare decision making.  
37  
38  
39  
40

41 88

42  
43 89 **Financial support**

44  
45 90 This research received no specific grant from any funding agency in the public, commercial or not-for-  
46  
47 91 profit sectors  
48  
49

50 92

51  
52 93 **Competing interests**

53  
54 94 SN has received funding from Research England, via the Advanced Wellbeing Research Centre  
55  
56 95 Accelerator, to evaluate the effect of a technology platform for cardiac rehabilitation developed by  
57  
58 96 Aseptika Ltd. SN, AFO, AC, and HH have received funding from AstraZeneca to investigate factors  
59  
60

1  
2  
3 97 influencing uptake on to cardiac rehabilitation. SN, SD, TB, and AC are members of the BACPR Council.  
4  
5 98 SD received funding from the Burdett Trust to investigate uptake on to exercise referral schemes. SD  
6  
7 99 participated in cardiovascular prevention advisory board for AstraZeneca. SH is Executive Director of  
8  
9 100 the British Association for Cardiovascular Prevention and Rehabilitation (BACPR). PB has received  
10  
11 101 funding from the National Institute of Health for Cardiac Rehabilitation-related research. PB has also  
12  
13 102 received consultation fees and honoraria from Merck, Ingelheim Boehringer, Corvia Medical, and  
14  
15 103 Boston Scientific.  
16  
17  
18  
19 104  
20  
21  
22 105  
23  
24  
25 106  
26  
27  
28 107  
29  
30  
31 108  
32  
33  
34 109  
35  
36  
37 110  
38  
39  
40 111  
41  
42  
43 112  
44  
45  
46 113  
47  
48  
49 114  
50  
51  
52 115  
53  
54  
55 116  
56  
57  
58 117  
59  
60 118

## 119 Introduction

120 Cardiac rehabilitation (CR) is a comprehensive programme of secondary prevention interventions for  
121 patients with heart disease, encompassing support for psychosocial health, medical risk management  
122 and cardiovascular risk factor modification, including exercise training [1]. Exercise-based CR reduces  
123 cardiovascular deaths and recurrent myocardial infarction within 10 years, hospital admissions within  
124 2 years, and improves health-related quality of life [2-5]. Despite these benefits, only 49% (n=141,648)  
125 of eligible United Kingdom (UK) patients enrolled on to a CR programme between 2012 and 2015 [6].  
126 Increasing uptake to 65% could lead to 21,000 fewer hospital admissions and 8,500 fewer deaths over  
127 10 years [7]. In response, NHS England set an ambitious target to increase CR uptake to 85% by 2029  
128 [8].

129 COVID-19 is spread by a highly contagious virus. As of September 2020, it has infected 26,121,999 and  
130 has killed 864,618 people worldwide [9]. The rapid spread of COVID-19 infections resulted in  
131 governments imposing restrictions on face-to-face human contact [10]. Numerous 'non-essential'  
132 healthcare services were suspended and patient attendance to continuing services has decreased due  
133 to fear of contracting COVID-19 [11, 12]. The COVID-19 pandemic may therefore undermine efforts to  
134 increase uptake to exercise-based CR.

135 Before COVID-19, expanding the availability of home-based programmes was recommended to  
136 increase participation in exercise-based CR [13]. This is partly due to a lack of capacity within existing  
137 face-to-face services [14]. Yet, in 2019, 8.8% of UK CR patients participated in home-based  
138 programmes [15]. The recent suspension of face-to-face healthcare services may have led to  
139 programmes rapidly adopting home-based, technology facilitated services. Data from urgent and non-  
140 urgent care centres in the United States of America (USA) reported that teleconferencing  
141 consultations increased from 82 on March 4<sup>th</sup> 2020, to 1336 on 19<sup>th</sup> March 2020 [16]. If a similar rate  
142 of technology adoption occurred in CR, this could have helped to maintain patient participation. These  
143 methods could also be adopted in to future standard practice to increase accessibility and subsequent  
144 uptake onto CR programmes.



1  
2  
3 145 The aim of this mixed-methods survey, conducted in collaboration with the British Association for  
4  
5 146 Cardiovascular Prevention and Rehabilitation (BACPR), was to investigate whether exercise-based CR  
6  
7 147 services continued during the COVID-19 pandemic. We also evaluated whether technology was used  
8  
9 148 to deliver exercise-based CR, and the professional experiences of this technology, during the COVID-  
10  
11 149 19 pandemic.  
12  
13  
14  
15 150  
16  
17

## 18 151 **Materials and Methods**

### 19 152 *Survey development*

20  
21  
22 153 The methods and results are reported in conjunction with the Checklist for Reporting Results of  
23  
24 154 Internet E-surveys (CHERRIES; Appendix 1) [17]. This voluntary, cross-sectional, international, open  
25  
26 155 survey, targeted at a convenience sample of healthcare professionals in exercise-based CR, was  
27  
28 156 developed by SN and AFO. The broad topic of questions, relating to the COVID-19 pandemic, were:  
29  
30  
31

- 32 157 1. If and how CR services were provided.
- 33  
34 158 2. The demographics and medical complexity of patients accessing CR services.
- 35  
36 159 3. How technology was used to undertake patient assessments and deliver the exercise component  
37  
38 160 of CR.
- 39  
40 161 4. The barriers encountered when using technology to deliver the exercise component of CR.
- 41  
42  
43  
44 162

45  
46  
47 163 The survey was reviewed by the members of the BACPR elected Council prior to ethical approval, and  
48  
49 164 amended accordingly. The BACPR council includes physicians, nurses, physiotherapists, exercise  
50  
51 165 physiologists, exercise instructors, psychologists, dietitians, and occupational therapists. The resulting  
52  
53 166 35-item questionnaire was uploaded to the Qualtrics<sup>XM</sup> online survey platform (Provo, Utah, USA).  
54  
55 167 Qualtrics has ISO/IEC 27001 security certification. The automated database was password protected  
56  
57 168 and stored on secure Qualtrics and Sheffield Hallam University servers. The survey was presented  
58  
59  
60

1  
2  
3 169 across 21 pages, including background information and consent. There were 22 tick box items (19  
4  
5 170 mandatory), seven mandatory numerical responses, three non-mandatory sliding bar responses, two  
6  
7 171 non-mandatory free-text responses, and one mandatory date entry response. Four questions also  
8  
9 172 permitted free-text responses under the option 'other'. Response validation was used on all questions,  
10  
11 173 where appropriate. Survey progress was displayed on each page. Participants did not have a  
12  
13 174 completeness check/review option at the end of the survey. Participants were only able to visit the  
14  
15 175 website once from the same IP address, and they had seven days to complete the survey once started.  
16  
17 176 The functionality of the survey was tested by SN, AOD, SD, SH, and AC. The final version of the online  
18  
19 177 survey (Appendix 2), was given institutional ethical approval by Sheffield Hallam University (ID:  
20  
21 178 ER24303491), on the 29<sup>th</sup> May 2020. All participants provided informed consent, and all study  
22  
23 179 procedures were carried out following the rules of the Declaration of Helsinki of 1975  
24  
25 180 (<https://www.wma.net/what-we-do/medical-ethics/declaration-of-helsinki/>), revised in 2013.  
26  
27  
28  
29  
30  
31  
32  
33

### 182 *Patient and public involvement*

34 183 Patients and/or the public were not involved in the design, or conduct, or reporting or dissemination  
35  
36 184 plans of this research.  
37  
38  
39  
40  
41  
42

### 186 *Survey dissemination*

43  
44  
45 187 On 2<sup>nd</sup> June 2020, a recruitment e-mail was sent to BACPR members; 746 healthcare professionals and  
46  
47 188 academics working in CR. This was repeated on June 25<sup>th</sup> 2020. The survey was also promoted on  
48  
49 189 social media platforms (Appendix 3). A link to the survey *was not* posted on any website. The survey  
50  
51 190 closed at 12pm on 31<sup>st</sup> July 2020. There were no incentives offered for participation.  
52  
53  
54  
55  
56  
57  
58  
59  
60

1  
2  
3 193 *Quantitative data analysis*  
4  
5

6 194 Categorical data are reported as the number of responses, expressed as a percentage (%) of the  
7  
8 195 respondents to each question. Continuous data are reported as median, with minimum and maximum  
9  
10 196 values. Responses were reported for the full cohort, and by the Phase of CR that the respondents  
11  
12 197 worked in. Phase I was defined as the inpatient stage, Phase II as the early discharge phase, Phase III  
13  
14 198 as a clinically supervised outpatient programme, and Phase IV as long-term physical activity  
15  
16 199 maintenance. The number of responses to each question varied and are detailed in Tables 1 and 2,  
17  
18 200 and Appendix 4. Tests of statistical significance were not conducted.  
19  
20  
21  
22  
23  
24

25  
26  
27  
28  
29  
30  
31  
32  
33  
34  
35  
36  
37  
38  
39  
40  
41  
42  
43  
44  
45  
46  
47  
48  
49  
50  
51  
52  
53  
54  
55  
56  
57  
58  
59  
60

201

202 *Qualitative Data analysis*

203 Free text answers were exported into NVivo 11 software for thematic analysis. Answers were coded  
204 inductively. The resulting coding framework was then reviewed to identify patterns and themes in  
205 the data. Similar codes were grouped to form lower order themes, which were then grouped into  
206 higher order themes. Each theme was given a descriptive explanation with illustrative quotes.

207

208 **Results**

209 *Responses*

210 Four-hundred and seven visits to the survey site were recorded. Seventy-seven (18.9%) did not  
211 progress past the study information and consent page (81.1% participation rate). Three-hundred and  
212 thirty responses were analysed, 296 (89.7%) were from the UK. The remaining responses were from  
213 Japan ( $n=8$ ; 2.4%), Australia ( $n=4$ ; 1.2%), the USA ( $n=4$ ; 1.2%), Republic of Ireland ( $n=4$ ; 1.2%), Gibraltar  
214 ( $n=2$ ; 0.6%), India ( $n=2$ ; 0.6%), South Africa ( $n=2$ ; 0.6%), Spain ( $n=2$ ; 0.6%), the Bailiwick of Guernsey  
215 ( $n=1$ ; 0.3%), Canada ( $n=1$ ; 0.3%), the Isle of Man ( $n=1$ ; 0.3%), and Kuwait  $n=1$ ; (0.3%).

216

### 217 *Service provision during COVID-19*

218 At the time of responding, 163 (49.3%) CR programmes had been suspended due to COVID-19 (Table  
219 1). The proportion of UK ( $n=147$ ; 49.7%) and non-UK ( $n=16$ ; 47.1%) services that had been suspended  
220 were similar. Phase IV programmes were most likely to have suspended all activities ( $n=89$ ; 72.4%;  
221 Table 1). The remaining questions in the survey were applicable to a maximum of 167 respondents.  
222 The number of responses to each question can be seen Table 1 and Appendix 4.

223 Following COVID-19 restrictions, 32 (19.9%) programmes reported that the same volume of patients  
224 were choosing to access their service (Table 1). Most programmes reported that either fewer patients  
225 ( $n=111$ ; 68.9%), or no patients ( $n=18$ ; 11.2%) were choosing to access their service (Table 1).  
226 Programmes believed that patients enrolling in CR were either as demographically as diverse' ( $n=122$ ;  
227 80.8%), or more diverse, than normal ( $n=7$ ; 4.6%; Table 1). UK CR programmes also estimated that  
228 90.4% (0.0 to 100.0%) of patients seen in the last seven days were 'White British'. Most CR  
229 programmes (92.5%) reported that the age of participants was similar to normal, with 70% (0.0 to  
230 100.0%) of patients enrolling in CR >65 years of age (Table 1). Programmes also reported that the sex  
231 of patients participating in CR was proportionally similar to normal. Female participation in CR was  
232 estimated at 30% (0.0 to 80%; Table 1).

233

### 234 *Technology adoption*

235 Figure 1 shows the increase in adoption of technology over time. The earliest date that a programme  
236 reported using technology was the 10<sup>th</sup> January 2010. The latest was the 20<sup>th</sup> June 2020. Thirty-three  
237 (25.8%) used technology to deliver exercise-based CR before COVID-19 was declared a pandemic by  
238 the World Health Organisation (WHO) [18]. The median date of technology adoption was 30<sup>th</sup> March  
239 2020. There were notable increases in technology adoption, the first coincided with the release of the  
240 UK's NHS long-term plan [8]. The second, more rapid increase, coincides with COVID-19 pandemic  
241 [18].

1  
2  
3 242 *Technology use in patient assessment*  
4  
5

6 243 The most commonly used technology was telephone ( $n=113$ ; 85.0%; Figure 2). 24.1% ( $n=32$ ) of  
7  
8 244 programmes reported that they were not assessing or estimating functional capacity. Practitioners  
9  
10 245 mostly relied on patient self-reported fitness to estimate functional capacity ( $n=92$ ; 69.2%). Some  
11  
12 246 programmes estimated functional capacity by using a questionnaire (26.3%,  $n=35$ ), or the patient's  
13  
14 247 own physical activity tracker (21.1%,  $n=28$ ). One Phase I (16.7%), two phase II (14.3%), and four Phase  
15  
16 248 IV CR programmes (13.8%) remotely supervised exercise testing (Figure 2).  
17  
18  
19  
20  
21  
22  
23  
24  
25  
26  
27  
28  
29  
30  
31  
32  
33  
34  
35  
36  
37  
38  
39  
40  
41  
42  
43  
44  
45  
46  
47  
48  
49  
50  
51  
52  
53  
54  
55  
56  
57  
58  
59  
60

Table 1 – Provision of cardiac rehabilitation services during the COVID-19 pandemic, displayed as number (%)

|                                                                          | All                 | Phase I             | Phase II             | Phase III           | Phase IV            |
|--------------------------------------------------------------------------|---------------------|---------------------|----------------------|---------------------|---------------------|
| <b>Service status</b>                                                    | (n=330)             | (n=14)              | (n=29)               | (n=164)             | (n=123)             |
| Services able to see as many patients as usual                           | 44 (13.3)           | 2 (14.3)            | 6 (20.7)             | 30 (18.3)           | 6 (4.9)             |
| Service able to see fewer patients                                       | 123 (37.3)          | 6 (42.9)            | 12 (41.4)            | 77 (47.0)           | 28 (22.8)           |
| Service suspended (%)                                                    | 163 (49.4)          | 7 (42.9)            | 11 (37.9)            | 57 (34.8)           | 89 (72.4)           |
| <b>Patients accessing cardiac rehabilitation</b>                         | (n=161)             | (n=8)               | (n=17)               | (n=102)             | (n=34)              |
| No patients are accessing the service                                    | 18 (11.2)           | 2 (25.0)            | 3 (17.6)             | 9 (8.8)             | 4 (11.8)            |
| Fewer patients are accessing the service                                 | 111 (68.9)          | 5 (62.5)            | 13 (76.5)            | 65 (63.7)           | 28 (82.4)           |
| Same number of patients are accessing the service                        | 32 (19.9)           | 1 (12.5)            | 1 (5.9)              | 28 (27.5)           | 2 (5.9)             |
| <b>Diversity of cardiac rehabilitation</b>                               | (n=151)             | (n=7)               | (n=16)               | (n=95)              | (n=33)              |
| Patient population is less diverse than before COVID-19                  | 22 (14.6)           | 3 (42.9)            | 1 (6.25)             | 13 (13.7)           | 5 (15.2)            |
| Patient population is as diverse as it was before COVID-19               | 122 (80.8)          | 4 (57.1)            | 15 (93.8)            | 78 (82.1)           | 25 (75.8)           |
| Patient population is more diverse than before COVID-19                  | 7 (4.6)             | 0 (0.0)             | 0 (0.0)              | 4 (4.2)             | 3 (9.1)             |
| Patient population is younger than before COVID-19                       | 6 (4.1)             | 0 (0.0)             | 2 (13.3)             | 2 (2.2)             | 2 (6.3)             |
| Patient population is similar to what it was before COVID-19             | 135 (92.5)          | 5 (71.4)            | 12 (80.0)            | 89 (96.7)           | 29 (90.6)           |
| Patient population is older than before COVID-19                         | 5 (3.4)             | 2 (28.6)            | 1 (6.7)              | 1 (1.1)             | 1 (3.1)             |
| Estimated percentage of patients in the last 7 days that were >65 years? | 70.0 (0.0 to 100.0) | 75.0 (60.0 to 85.0) | 67.0 (38.0 to 100.0) | 64.5 (0.0 to 100.0) | 80.0 (0.0 to 100.0) |
| Proportion of female participation is smaller                            | 11 (0.8)            | 1 (16.7)            | 0 (0.0)              | 8 (9.4)             | 2 (6.9)             |
| Proportion of female participation is the same                           | 113 (83.7)          | 4 (66.7)            | 14 (93.3)            | 69 (81.2)           | 26 (89.7)           |
| Proportion of female participation is larger                             | 11 (0.8)            | 1 (16.7)            | 1 (6.7)              | 8 (9.4)             | 1 (3.4)             |
| Proportion of male participation is smaller                              | 6 (4.4)             | 1 (16.7)            | 1 (6.7)              | 2 (2.4)             | 2 (7.0)             |
| Proportion of male participation is the same                             | 123 (91.1)          | 4 (66.7)            | 14 (93.3)            | 79 (92.9)           | 26 (89.7)           |
| Proportion of male participation is larger                               | 6 (4.4)             | 1 (16.7)            | 0 (0.0)              | 4 (4.7)             | 1 (3.4)             |
| Estimated percentage of patients in the last 7 days were female?         | 30.0 (0.0 to 80.0)  | 40.0 (10.0 to 70.0) | 30.0 (1.0 to 57.0)   | 30.0 (0.0 to 80.0)  | 40.0 (1.0 to 73.0)  |

### 249 *Technology use in physical activity and exercise prescription*

250 Most services were able to provide physical activity advice ( $n=102$ ; 82.9%). Seventy-two (58.5%)  
251 programmes also offered structured exercise training programmes. Telephone remained the most  
252 commonly used technology to facilitate the physical activity or exercise component of CR ( $n=86$ ,  
253 64.7%; Figure 3). Pre-recorded online videos ( $n=69$ ; 51.9%) were also widely used, particularly among  
254 Phase III programmes ( $n=54$ ; 64.3%; Figure 3). Most CR services were able to provide physical activity  
255 or structured exercise training to patients at low ( $n=117$ ; 95.1%) and moderate risk ( $n=109$ ; 88.6%) of  
256 exercise-induced cardiac events. Half (51.2%;  $n=63$ ) were able to offer services to patients at high-risk  
257 of exercise-induced cardiac events. Three (2.8%) programmes reported one adverse event resulting in  
258 minor injury whilst using technology to deliver the exercise component of CR (three events in total).  
259 There were no reports of life changing injury, or death.

260

### 261 *Barriers to using technology*

262 The number of responses to each question about barriers to using technology is shown in Table 2.  
263 Respondents were asked to state *any* barriers that they encountered when using technology. Only  
264 two (1.9%) programmes reported 'no barriers' (Table 2). Most ( $n=93$ ; 86.9%) encountered a "lack of  
265 patient confidence" with technology (Table 2). Qualitative analysis of the barriers to using technology  
266 fell into two categories; logistical and organisational barriers, and patient-related barriers. Logistical  
267 and organisational barriers were largely a result of healthcare organisations being unprepared, and  
268 not familiar with using online healthcare delivery. Onerous governance processes or delayed access  
269 to the necessary IT equipment were also described. Patient-related barriers were associated with  
270 communication (either language or understanding), and concerns that patients were either over-  
271 reporting their activity or not following advice provided.

272

1  
2  
3 273 *Practitioner experiences*  
4  
5

6 274 Qualitative analysis of free text answers to the final question allowing “Any other comments” resulted  
7  
8 275 in the identification of three higher order themes; i) impact on patient experience; ii) challenges for  
9  
10 276 staff and iii) implications for future delivery.  
11  
12

13 277  
14  
15

16 278 i) Impact on patient experience  
17  
18

19 279 Survey respondents varied in their views about the impact on patient engagement and experience.  
20  
21 280 Technology was acknowledged as a valuable means of connecting patients with CR staff, but a small  
22  
23 281 number of respondents also highlighted that it was harder to establish a rapport this way. One  
24  
25 282 participant reported a decline in patients’ fitness outcomes whilst another claimed that patients  
26  
27 283 exercised harder at home without peers to distract them. More commonly, participants reported that  
28  
29 284 regardless of the perceived benefits of remote delivery, it was difficult to replicate the social benefits  
30  
31 285 associated with group exercise delivery:  
32  
33  
34

35 286  
36  
37

38 287 *“The lack of contact with other patients means the patients miss out on the social and*  
39  
40 288 *emotional support from each other.”*  
41  
42  
43  
44  
45  
46  
47  
48  
49  
50  
51  
52  
53  
54  
55  
56  
57  
58  
59  
60



Table 2 –Barriers to using technology in exercise-based cardiac rehabilitation displayed as number (%)

| Barriers to using technology                                                       | All (n=107) | Phase I (n=6) | Phase II (n=9) | Phase III (n=68) | Phase IV (n=24) |
|------------------------------------------------------------------------------------|-------------|---------------|----------------|------------------|-----------------|
| Lack of patient confidence                                                         | 93 (86.9)   | 2 (33.3)      | 8 (88.9)       | 60 (88.2)        | 23 (95.8)       |
| Patients do not have access to computers/tablets/smart phone                       | 86 (80.4)   | 2 (33.3)      | 4 (44.4)       | 61 (89.7)        | 19 (79.2)       |
| Patients do not have an internet connection                                        | 73 (68.2)   | 2 (33.3)      | 6 (66.7)       | 48 (70.6)        | 17 (70.8)       |
| Patients lack of interest in receiving services using technology                   | 65 (60.7)   | 1 (16.7)      | 5 (55.6)       | 44 (64.7)        | 15 (62.5)       |
| Professionals are concerned about patient safety                                   | 43 (40.2)   | 0 (0.0)       | 3 (33.3)       | 34 (50.0)        | 6 (25.0)        |
| Patients are concerned about safety                                                | 32 (29.9)   | 2 (33.3)      | 3 (33.3)       | 21 (30.9)        | 6 (25.0)        |
| Internet security and patient confidentiality concerns                             | 27 (25.2)   | 1 (16.7)      | 4 (44.4)       | 18 (25)          | 4 (16.7)        |
| Professionals not confident delivering service using technology                    | 24 (22.4)   | 0 (0.0)       | 2 (22.2)       | 19 (27.9)        | 3 (12.5)        |
| Trust/Health Board do not support the delivery of health services using technology | 16 (15.0)   | 1 (16.7)      | 0 (0.0)        | 14 (20.6)        | 1 (4.2)         |
| No barriers                                                                        | 2 (1.9)     | 1 (11.1)      | 0 (0.0)        | 1 (1.5)          | 0 (0.0)         |

1  
2  
3 227 ii) Challenges for professionals  
4  
5

6 228 Survey participants cited a range of challenges to adoption of technology, including the limitations of  
7  
8 229 existing platforms, such as smart device applications for CR. These were described as lacking patient-  
9  
10 230 centred or motivational content and time-consuming to use. Participants reported further difficulties  
11  
12 231 associated with COVID-19 related staff redeployment or illness, and reiterated barriers such as lack of  
13  
14 232 access to technology and organisational delays caused by IT and governance restrictions.  
15  
16

17  
18 233 A large number of comments described concerns relating to practitioners' inability to observe  
19  
20 234 patients, limiting safe and accurate assessment of functional capacity. This had resulted in a more  
21  
22 235 cautious approach, with respondents reporting that they prescribed only gentle or low-level exercise:  
23  
24

25 236 *"Our main concern has been the difficulty of not being able to complete functional capacity*  
26  
27 237 *assessments, we have therefore recommended patients exercise at a lower level than we*  
28  
29 238 *normally would."*  
30  
31

32  
33 239

34 240 iii) Implications for future delivery  
35  
36

37 241 Many respondents reported optimism about continuing to incorporate technology in future CR  
38  
39 242 delivery. Nevertheless, it was generally recognised that delivery should be flexible. Exercise  
40  
41 243 programmes should be tailored to individual needs and risk levels and patients should be provided  
42  
43 244 with a range of options for engaging with CR, including both face-to-face contact with CR staff and  
44  
45 245 online/home-based exercise.  
46  
47

48  
49 246 Several comments indicated opportunities for improvement in the technology available, with one  
50  
51 247 participant suggesting that current formats were driven by NACR audit data requirements as opposed  
52  
53 248 to patient needs. Another respondent called for further research to inform more confident remote  
54  
55 249 exercise prescription:  
56  
57  
58  
59  
60

1  
2  
3 227 *“Still feel face to face assessment is superior for more frail patients ...and for higher risk patients...*  
4  
5 228 *Nevertheless, I am gaining more confidence in remote assessment, and would be reassured further by*  
6  
7 229 *some research to demonstrate its safety and efficacy. I already know remote delivery has been shown*  
8  
9 230 *to be safe and effective, but as far as I am aware this has been evidenced only when prescribed from*  
10  
11 231 *face to face assessment.”*  
12  
13  
14

15 232

16  
17  
18 233 Quantitatively, 94 (88.7%) programmes believed that technology should be available for patients in  
19  
20 234 the future.  
21  
22

23 235

## 26 236 **Discussion**

27  
28  
29 237 To our knowledge, this is the first study to quantitatively document the effect that restrictions,  
30  
31 238 imposed due to COVID-19, had on exercise-based CR programmes. We found that nearly half of all  
32  
33 239 programmes had been suspended and that most centres reported a reduction in patient engagement  
34  
35 240 with services during the COVID-19 pandemic. Practitioners reported that the age and sex of patients  
36  
37 241 attending CR was similar to before the COVID-19 pandemic. Technology was rapidly adopted to deliver  
38  
39 242 CR, with less sophisticated technology, such as the telephone, being most widely used. Higher risk  
40  
41 243 patients were less likely to be offered remote CR using technology. Nearly all centres reported barriers  
42  
43 244 to using technology to deliver CR. Finally, despite an openness to adopting technology by practitioners,  
44  
45 245 there were concerns surrounding availability of, and confidence in using technology. Qualitatively,  
46  
47 246 patient assessment, less opportunity for socialisation, and safety were highlighted.  
48  
49  
50

51 247

### 55 248 *Service provision*

56  
57  
58 249 COVID-19 has resulted in many non-essential healthcare services being suspended. We have shown  
59  
60 250 that this was true for half of exercise-based CR services. In 2019, 89,573 patients accessed exercise-

1  
2  
3 227 based CR in the UK [15], therefore a high proportion of cardiac patients may have been negatively  
4  
5 228 affected by this widespread service disruption. Given that exercise-based CR improves quality of life  
6  
7  
8 229 [4, 19] and reduces hospital admissions [3], suspension of services is likely to result in worsening  
9  
10 230 clinical symptoms, wellbeing, and increased hospital admissions long-term. This may place an  
11  
12 231 increased burden on healthcare services in the coming months. Nevertheless, there was an increase  
13  
14 232 in the use of technology in CR shortly after COVID-19 was declared a Pandemic by the WHO [18].  
15  
16 233 Comparing long-term patient outcomes from programmes that continued service provision with  
17  
18 234 programmes that were unable to continue will help to determine the effectiveness of these changes.  
19  
20  
21  
22 235

#### 23 236 *Technology adoption and barriers*

24  
25  
26  
27 237 Recent editorials and reviews have suggested that COVID-19 could be a catalyst for large-scale  
28  
29 238 changes in the way that CR is delivered [20, 21]. We found that most services started using technology  
30  
31 239 to deliver home-based exercise-based CR within three weeks of COVID-19 being declared a pandemic  
32  
33 240 by the WHO [18], only three services were providing face-to-face services. This suggests that the  
34  
35 241 capacity of CR services to provide home-based rehabilitation programmes has rapidly increased. If  
36  
37 242 maintained, subject to robust evidence, the potential for increased accessibility, could positively  
38  
39 243 influence participation in CR when face-to-face service have resumed.  
40  
41  
42  
43

44 244 Traditional modes of communication such as telephone were most commonly used. Surprisingly few  
45  
46 245 services used tele-conferencing, smart device applications and web-based systems. Healthcare  
47  
48 246 professionals cited that patients often lacked confidence using equipment and/or that patients did  
49  
50 247 not have the required equipment for technology use. The number and sociodemographic profile of  
51  
52 248 patients for whom this was a genuine barrier is unclear. Others have reported that age may be a factor,  
53  
54 249 with people aged 22-44 years most likely use tele-conferencing facilities [16], and people over 65 years  
55  
56 250 being less likely to have a smart phone [22]. This could warrant further investigation to address  
57  
58 251 inequalities in the accessibility of technology-based provision of CR. Meanwhile, professionals'

1  
2  
3 227 concern for patient safety (40.2%) and internet security (25.2%) were also likely to contribute to the  
4  
5 228 low uptake of novel technology. Healthcare organisations being underprepared for the adoption of  
6  
7 229 new technology may also play a role, although this was less frequently reported in quantitative  
8  
9 230 analysis. 'Top-down' endorsement of technology by health Trusts, Health Boards or healthcare  
10  
11 231 providers may give healthcare professionals confidence in using technology.  
12  
13  
14  
15 232

### 17 233 *Participation*

18  
19  
20 234 Participation in CR continued despite COVID-19 restrictions. However, programmes were able to offer  
21  
22 235 services to fewer patients and uptake was reduced. Furthermore, UK programmes reported that ~90%  
23  
24 236 of participants were 'White British', which is proportionately higher than recently indicated (79%) in  
25  
26 237 the 2019 NACR report [15]. Future research should investigate the direct impact of COVID-19 on  
27  
28 238 minority group participation in exercise-based CR, and explore how to increase their participation  
29  
30 239 when it is delivered using technology. Encouragingly, programmes reported that similar proportions  
31  
32 240 of males and females, and people over the age of 65 years, engaged with CR compared to pre-COVID-  
33  
34 241 19 participation.

35  
36  
37 242 Data from our survey showed that 41.5% of programmes were unable to provide exercise-based CR  
38  
39 243 to patients at high-risk of exercise-induced cardiac events. CR should be available to all eligible  
40  
41 244 patients, irrespectively of risk [1]. The development and refinement of future technology-based  
42  
43 245 interventions should be inclusive of all risk levels. Qualitative comments highlighted concerns about  
44  
45 246 using technology to remotely deliver exercise-based CR for frail patients. Safety concerns were also a  
46  
47 247 common feature in our quantitative analysis (Table 2). The wide use of 'offline' delivery modes such  
48  
49 248 as telephone and pre-recorded videos identified in our survey limits the capacity to evaluate  
50  
51 249 physiological information during exercise and the scope for practitioners to tailor advice to the  
52  
53 250 individual. It may be perceived as unsafe for patients at high-risk of exercise-induced event, but not  
54  
55  
56  
57  
58  
59  
60

1  
2  
3 227 for lower risk patients. Overcoming these concerns, through robust evidence, may be an important  
4  
5 228 step in negating future health inequalities.  
6  
7

8 229

9  
10  
11 230 *Limitations*  
12

13  
14 231 The high UK response rate to our survey ( $n=296$ ; 89.7%) makes it likely that our findings are  
15  
16 232 representative of CR in the UK. However, the response rate from CR programmes outside of the UK  
17  
18 233 was low. The generalisability of our findings to the rest of the world may therefore be limited.  
19  
20 234 Additionally, we aimed to recruit healthcare professionals rather than patients. Future research  
21  
22 235 should investigate patient perceptions of using technology in CR so that a more complete  
23  
24 236 understanding of barriers can be reported. We also asked study participants to report on whether  
25  
26 237 they perceived that certain demographics of the patients engaging with their services had changed,  
27  
28 238 therefore we cannot exclude information bias. Finally, individual practitioners rather than centres  
29  
30 239 were targeted to respond. Therefore, the risk of bias could have been increased by multiple  
31  
32 240 practitioners from the same centre completing the survey.  
33  
34  
35

36  
37 241

38  
39  
40 242 *Conclusions*  
41

42  
43 243 Nearly half of all CR programmes have been suspended during COVID-19 restrictions. Technology was  
44  
45 244 rapidly adopted by CR services which may increase participation beyond COVID-19. However, higher  
46  
47 245 risk patients may be disadvantaged by technology use, whilst people in the UK who are 'White British'  
48  
49 246 may be most likely to benefit for it. Our findings indicate a role for technology in future CR delivery.  
50  
51 247 There is a need for innovation in patient-centred, interactive technological resources that also foster  
52  
53 248 confidence amongst practitioners. Future research needs to investigate the longer-term adoption of  
54  
55 249 technology in CR following COVID-19, and its effects on participation, patient experience and safety.  
56  
57  
58  
59  
60

1  
2  
3 244 **Author Statement**  
4  
5

6 245 **Conceptualization:** Simon Nichols; **Methodology:** Simon Nichols, Alasdair O’Doherty, Helen  
7  
8 246 Humphreys, Susan Dawkes, Aynsley Cowie, Sally Hinton; **Formal Analysis:** Simon Nichols, Alasdair  
9  
10 247 O’Doherty, Helen Humphreys; **Investigation:** Simon Nichols, Alasdair O’Doherty, Helen Humphreys,  
11  
12 248 Susan Dawkes, Aynsley Cowie, Sally Hinton, Peter Brubaker, Tom Butler; **Data curation:** Simon Nichols,  
13  
14 249 Helen Humphreys; **Writing- Original draft preparation:** Simon Nichols; **Writing - Review & Editing:**  
15  
16 250 Simon Nichols, Alasdair O’Doherty, Helen Humphreys, Susan Dawkes, Aynsley Cowie, Sally Hinton,  
17  
18 251 Peter Brubaker, Tom Butler; **Visualization:** Simon Nichols; **Supervision:** Simon Nichols; **Project**  
19  
20 252 **Administration:** Simon Nichols  
21  
22  
23  
24  
25 253  
26  
27  
28 254 **Acknowledgements**

29  
30 255 The authors would like to thank the healthcare professionals who completed the survey and the  
31  
32 256 BACPR committee for reviewing the design of the survey. We would also like to thank the individuals  
33  
34 257 involved in promoting the survey within their networks.  
35  
36  
37  
38 258

39 259 **Patient and public involvement**

40 260 Patients and/or the public were not involved in the design, or conduct, or reporting or dissemination  
41  
42 261 plans of this research.  
43  
44  
45  
46  
47 262

48 263 **Data sharing**

49 264 Data will be available, on reasonable request, 18 months after publication of the manuscript. Data can  
50  
51 265 be requested by contacting the corresponding author, or by contacting [library-research-](mailto:library-research-support@shu.ac.uk)  
52  
53 266 [support@shu.ac.uk](mailto:library-research-support@shu.ac.uk).  
54  
55  
56  
57  
58 267  
59  
60

1  
2  
3 244  
4  
5  
6 245  
7  
8 246  
9  
10 247  
11  
12 248  
13  
14 249  
15  
16 250  
17 251  
18  
19 252  
20  
21 253  
22  
23 254  
24  
25 255  
26  
27 256  
28  
29 257  
30  
31 258  
32  
33 259  
34  
35 260  
36  
37 261  
38  
39 262  
40  
41 263  
42  
43 264  
44  
45 265  
46  
47 266  
48  
49 267  
50  
51 268  
52  
53 269  
54  
55 270  
56  
57 271  
58  
59 272  
60

**Figure 1** – Data showing the use of technology to deliver exercise-based cardiac rehabilitation between January 2010 and June 2020. Black bars indicate how many programmes started using their chosen technology, on a given date. The grey area shows the cumulative number of cardiac rehabilitation programmes using technology.

**Figure 2** – Types of technology used to undertake baseline assessments. Orange bars indicate Phase I programmes, yellow bars indicate Phase II programmes, green lines indicate Phase III programmes, red bars indicate Phase IV programmes.

**Figure 3** – Types of technology used to deliver the exercise component of cardiac rehabilitation. Orange bars indicate Phase I programmes, yellow bars indicate Phase II programmes, green lines indicate Phase III programmes, red bars indicate Phase IV programmes.

review only



244 **References**

- 245 1. Cowie, A., et al., *Standards and core components for cardiovascular disease prevention and rehabilitation*. Heart, 2019. **105**(7): p. 510-515.
- 246 2. Abell, B., P. Glasziou, and T. Hoffmann, *The Contribution of Individual Exercise Training Components to Clinical Outcomes in Randomised Controlled Trials of Cardiac Rehabilitation: A Systematic Review and Meta-regression*. Sports Med Open, 2017. **3**(1): p. 19.
- 247 3. Powell, R., et al., *Is exercise-based cardiac rehabilitation effective? A systematic review and meta-analysis to re-examine the evidence*. BMJ Open, 2018. **8**(3): p. e019656.
- 248 4. Dalal, H.M., et al., *The effects and costs of home-based rehabilitation for heart failure with reduced ejection fraction: The REACH-HF multicentre randomized controlled trial*. Eur J Prev Cardiol, 2019. **26**(3): p. 262-272.
- 249 5. Taylor, R.S., et al., *Exercise-Based Rehabilitation for Heart Failure: Cochrane Systematic Review, Meta-Analysis, and Trial Sequential Analysis*. JACC Heart Fail, 2019. **7**(8): p. 691-705.
- 250 6. Sumner, J., S.L. Grace, and P. Doherty, *Predictors of Cardiac Rehabilitation Utilization in England: Results From the National Audit*. J Am Heart Assoc, 2016. **5**(10).
- 251 7. Hinde, S., et al., *Improving cardiac rehabilitation uptake: Potential health gains by socioeconomic status*. Eur J Prev Cardiol, 2019. **26**(17): p. 1816-1823.
- 252 8. NHS England., *The NHS Long Term Plan*. 2019: <https://www.longtermplan.nhs.uk/wp-content/uploads/2019/01/nhs-long-term-plan.pdf> .
- 253 9. World Health Organisation. *Weekly operational update on COVID-19*. 2020 [cited 2020 7th September]; Available from: [https://www.who.int/docs/default-source/coronaviruse/situation-reports/wou-4-september-2020-approved.pdf?sfvrsn=91215c78\\_4](https://www.who.int/docs/default-source/coronaviruse/situation-reports/wou-4-september-2020-approved.pdf?sfvrsn=91215c78_4).
- 254 10. Le NK, L.A., Brooks JP, Khetpal S, Liauw D, Izurieta R, et al., *Impact of government-imposed social distancing measures on COVID-19 morbidity and mortality around the world*. 2020: Bull World Health Organ.
- 255 11. Moroni, F., et al., *Collateral Damage: Medical Care Avoidance Behavior Among Patients With Myocardial Infarction During the COVID-19 Pandemic*. JACC: Case Reports, 2020.
- 256 12. Garcia, S., et al., *Reduction in ST-Segment Elevation Cardiac Catheterization Laboratory Activations in the United States During COVID-19 Pandemic*. J Am Coll Cardiol, 2020. **75**(22): p. 2871-2872.
- 257 13. Anderson, L., et al., *Home-based versus centre-based cardiac rehabilitation*. Cochrane Database Syst Rev, 2017. **6**: p. CD007130.
- 258 14. Turk-Adawi, K., et al., *Cardiac Rehabilitation Availability and Density around the Globe*. EClinicalMedicine, 2019. **13**: p. 31-45.
- 259 15. British Heart Foundation. *The National Audit of Cardiac Rehabilitation: Quality and Outcomes Report 2019*. 2019.
- 260 16. Mann, D.M., et al., *COVID-19 transforms health care through telemedicine: Evidence from the field*. J Am Med Inform Assoc, 2020. **27**(7): p. 1132-1135.
- 261 17. Eysenbach, G., *Improving the quality of Web surveys: the Checklist for Reporting Results of Internet E-Surveys (CHERRIES)*. J Med Internet Res, 2004. **6**(3): p. e34.
- 262 18. World Health Organisation Archived: *WHO Timeline - COVID-19*. 2020.
- 263 19. McGregor, G., et al., *Does contemporary exercise-based cardiac rehabilitation improve quality of life for people with coronary artery disease? A systematic review and meta-analysis*. BMJ Open, 2020. **10**(6): p. e036089.
- 264 20. Babu, A.S., et al., *COVID-19: A Time for Alternate Models in Cardiac Rehabilitation to Take Centre Stage*. Can J Cardiol, 2020. **36**(6): p. 792-794.
- 265 21. Nichols, S., et al., *Current Insights into Exercise-based Cardiac Rehabilitation in Patients with Coronary Heart Disease and Chronic Heart Failure*. Int J Sports Med, 2020.

1  
2  
3  
4  
5  
6  
7  
8  
9  
10  
11  
12  
13  
14  
15  
16  
17  
18  
19  
20  
21  
22  
23  
24  
25  
26  
27  
28  
29  
30  
31  
32  
33  
34  
35  
36  
37  
38  
39  
40  
41  
42  
43  
44  
45  
46  
47  
48  
49  
50  
51  
52  
53  
54  
55  
56  
57  
58  
59  
60

244 22. Strain, T., K. Wijndaele, and S. Brage, *Physical Activity Surveillance Through Smartphone*  
245 *Apps and Wearable Trackers: Examining the UK Potential for Nationally Representative*  
246 *Sampling*. JMIR Mhealth Uhealth, 2019. **7**(1): p. e11898.

247

For peer review only

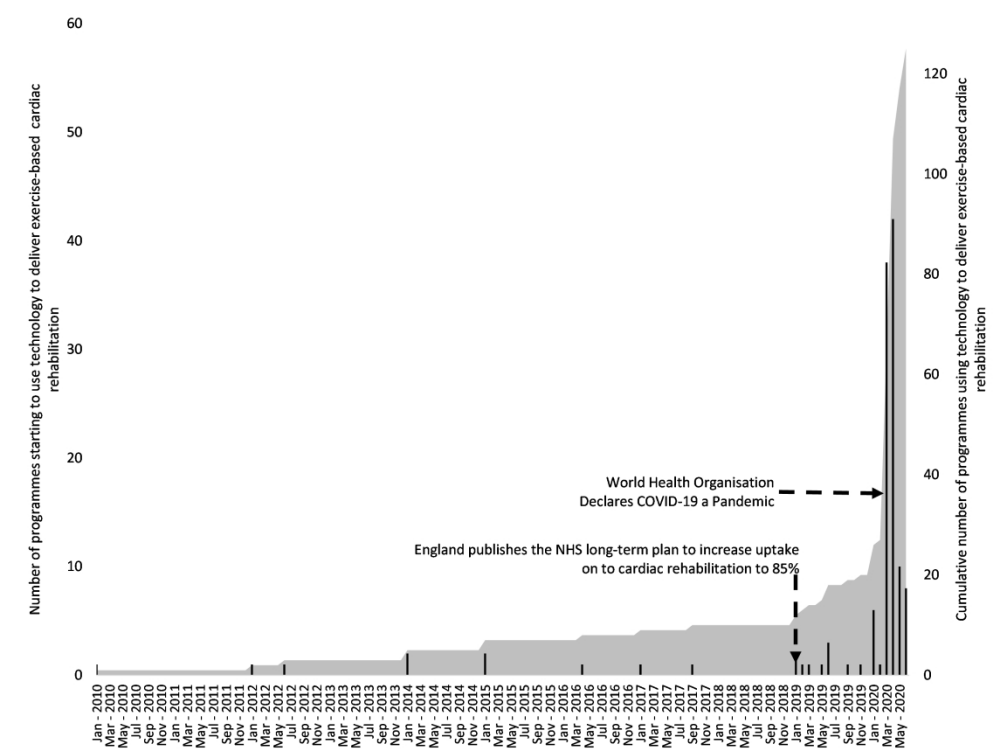

Figure 1 – Data showing the use of technology to deliver exercise-based cardiac rehabilitation between January 2010 and June 2020. Black bars indicate how many programmes started using their chosen technology, on a given date. The grey area shows the cumulative number of cardiac rehabilitation programmes using technology.

250x188mm (300 x 300 DPI)

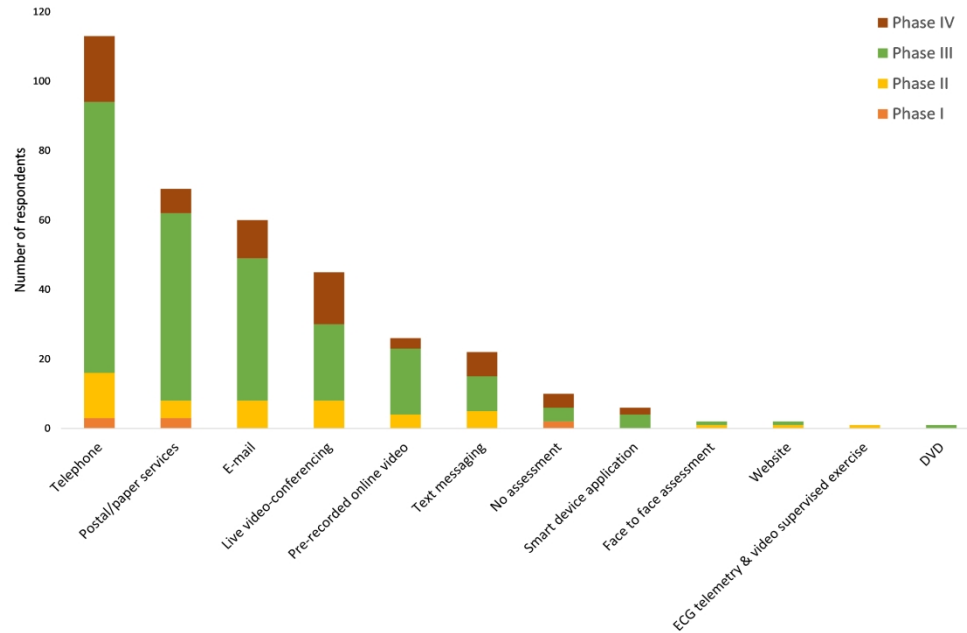

Figure 2 – Types of technology used to undertake baseline assessments. Orange bars indicate Phase I programmes, yellow bars indicate Phase II programmes, green lines indicate Phase III programmes, red bars indicate Phase IV programmes.

272x175mm (300 x 300 DPI)

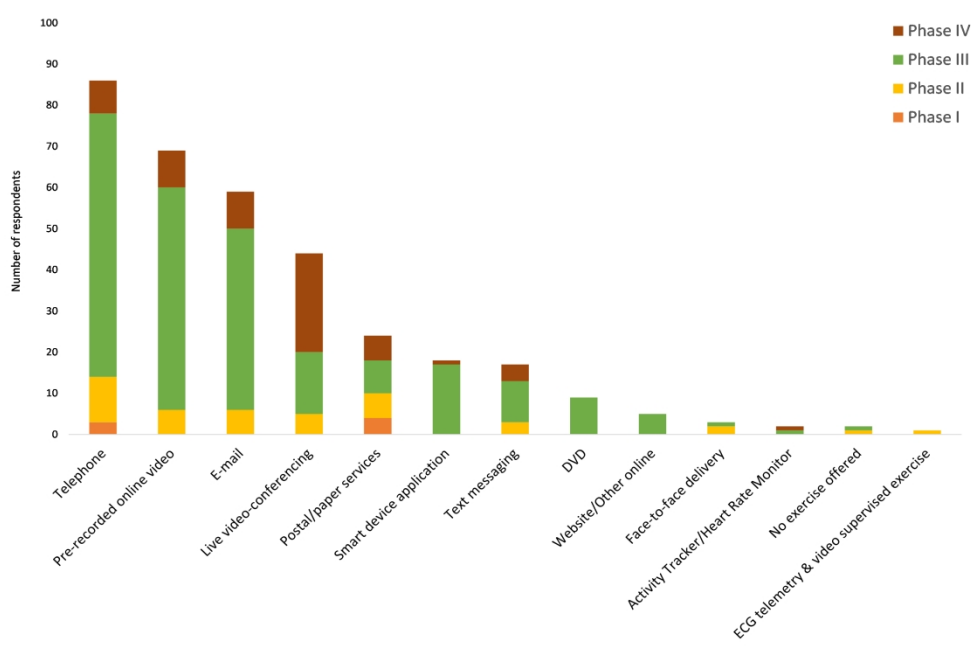

Figure 3 – Types of technology used to deliver the exercise component of cardiac rehabilitation. Orange bars indicate Phase I programmes, yellow bars indicate Phase II programmes, green lines indicate Phase III programmes, red bars indicate Phase IV programmes.

270x176mm (300 x 300 DPI)

1  
2  
3  
4  
5  
6  
7  
8  
9  
10  
11  
12  
13  
14  
15  
16  
17  
18  
19  
20  
21  
22  
23  
24  
25  
26  
27  
28  
29  
30  
31  
32  
33  
34  
35  
36  
37  
38  
39  
40  
41  
42  
43  
44  
45  
46

### Appendix 1 - Checklist for Reporting Results of Internet E-Surveys (CHERRIES)

| <b>Checklist Item</b>            | <b>Explanation</b>                                                                                                                                                                                                                                                                                                                                                                                                    | <b>Page Number</b>  |
|----------------------------------|-----------------------------------------------------------------------------------------------------------------------------------------------------------------------------------------------------------------------------------------------------------------------------------------------------------------------------------------------------------------------------------------------------------------------|---------------------|
| Describe survey design           | Describe target population, sample frame. Is the sample a convenience sample? (In “open” surveys this is most likely.)                                                                                                                                                                                                                                                                                                | 7                   |
| IRB approval                     | Mention whether the study has been approved by an IRB.                                                                                                                                                                                                                                                                                                                                                                | 8                   |
| Informed consent                 | Describe the informed consent process. Where were the participants told the length of time of the survey, which data were stored and where and for how long, who the investigator was, and the purpose of the study?                                                                                                                                                                                                  | Page 8 & Appendix 2 |
| Data protection                  | If any personal information was collected or stored, describe what mechanisms were used to protect unauthorized access.                                                                                                                                                                                                                                                                                               | 7                   |
| Development and testing          | State how the survey was developed, including whether the usability and technical functionality of the electronic questionnaire had been tested before fielding the questionnaire.                                                                                                                                                                                                                                    | 7 & 8               |
| Open survey versus closed survey | An “open survey” is a survey open for each visitor of a site, while a closed survey is only open to a sample which the investigator knows (password-protected survey).                                                                                                                                                                                                                                                | 7                   |
| Contact mode                     | Indicate whether or not the initial contact with the potential participants was made on the Internet. (Investigators may also send out questionnaires by mail and allow for Web-based data entry.)                                                                                                                                                                                                                    | 8                   |
| Advertising the survey           | How/where was the survey announced or advertised? Some examples are offline media (newspapers), or online (mailing lists – If yes, which ones?) or banner ads (Where were these banner ads posted and what did they look like?). It is important to know the wording of the announcement as it will heavily influence who chooses to participate. Ideally the survey announcement should be published as an appendix. | 8 & Appendix 3      |
| Web/E-mail                       | State the type of e-survey (eg, one posted on a Web site, or one sent out through e-mail). If it is an e-mail survey, were the responses entered manually into a database, or was there an automatic method for capturing responses?                                                                                                                                                                                  | 8                   |
| Context                          | Describe the Web site (for mailing list/newsgroup) in which the survey was posted. What is the Web site about, who is visiting it, what are visitors normally looking for? Discuss to what degree the content of the Web site could pre-select the sample or influence the results. For example, a                                                                                                                    | 8                   |

|                                                                  |                                                                                                                                                                                                                                                                                                                                                                                                                                                                                               |                   |
|------------------------------------------------------------------|-----------------------------------------------------------------------------------------------------------------------------------------------------------------------------------------------------------------------------------------------------------------------------------------------------------------------------------------------------------------------------------------------------------------------------------------------------------------------------------------------|-------------------|
|                                                                  | survey about vaccination on a anti-immunization Web site will have different results from a Web survey conducted on a government Web site                                                                                                                                                                                                                                                                                                                                                     |                   |
| Mandatory/voluntary                                              | Was it a mandatory survey to be filled in by every visitor who wanted to enter the Web site, or was it a voluntary survey?                                                                                                                                                                                                                                                                                                                                                                    | 7                 |
| Incentives                                                       | Were any incentives offered (eg, monetary, prizes, or non-monetary incentives such as an offer to provide the survey results)?                                                                                                                                                                                                                                                                                                                                                                | 8                 |
| Time/Date                                                        | In what timeframe were the data collected?                                                                                                                                                                                                                                                                                                                                                                                                                                                    | 8                 |
| Randomization of items or questionnaires                         | To prevent biases items can be randomized or alternated.                                                                                                                                                                                                                                                                                                                                                                                                                                      | N/A               |
| Adaptive questioning                                             | Use adaptive questioning (certain items, or only conditionally displayed based on responses to other items) to reduce number and complexity of the questions.                                                                                                                                                                                                                                                                                                                                 | N/A               |
| Number of Items                                                  | What was the number of questionnaire items per page? The number of items is an important factor for the completion rate.                                                                                                                                                                                                                                                                                                                                                                      | 7, 8 & Appendix 2 |
| Number of screens (pages)                                        | Over how many pages was the questionnaire distributed? The number of items is an important factor for the completion rate.                                                                                                                                                                                                                                                                                                                                                                    | 8                 |
| Completeness check                                               | It is technically possible to do consistency or completeness checks before the questionnaire is submitted. Was this done, and if "yes", how (usually JavaScript)? An alternative is to check for completeness after the questionnaire has been submitted (and highlight mandatory items). If this has been done, it should be reported. All items should provide a non-response option such as "not applicable" or "rather not say", and selection of one response option should be enforced. | 8                 |
| Review step                                                      | State whether respondents were able to review and change their answers (eg, through a Back button or a Review step which displays a summary of the responses and asks the respondents if they are correct).                                                                                                                                                                                                                                                                                   | 8                 |
| Unique site visitor                                              | If you provide view rates or participation rates, you need to define how you determined a unique visitor. There are different techniques available, based on IP addresses or cookies or both.                                                                                                                                                                                                                                                                                                 | 8                 |
| View rate (Ratio of unique survey visitors/unique site visitors) | Requires counting unique visitors to the first page of the survey, divided by the number of unique site visitors (not page views!). It is not unusual to have view rates of less than 0.1 % if the survey is voluntary.                                                                                                                                                                                                                                                                       | N/A               |

|                                                                                                              |                                                                                                                                                                                                                                                                                                                                                                                                                                                                                                                                                                            |                                                                                           |
|--------------------------------------------------------------------------------------------------------------|----------------------------------------------------------------------------------------------------------------------------------------------------------------------------------------------------------------------------------------------------------------------------------------------------------------------------------------------------------------------------------------------------------------------------------------------------------------------------------------------------------------------------------------------------------------------------|-------------------------------------------------------------------------------------------|
| Participation rate<br>(Ratio of unique visitors who agreed to participate/unique first survey page visitors) | Count the unique number of people who filled in the first survey page (or agreed to participate, for example by checking a checkbox), divided by visitors who visit the first page of the survey (or the informed consents page, if present). This can also be called “recruitment” rate.                                                                                                                                                                                                                                                                                  | 9                                                                                         |
| Completion rate<br>(Ratio of users who finished the survey/users who agreed to participate)                  | The number of people submitting the last questionnaire page, divided by the number of people who agreed to participate (or submitted the first survey page). This is only relevant if there is a separate “informed consent” page or if the survey goes over several pages. This is a measure for attrition. Note that “completion” can involve leaving questionnaire items blank. This is not a measure for how completely questionnaires were filled in. (If you need a measure for this, use the word “completeness rate”.)                                             | N/A – Because if programmes were cancelled they weren’t able to progress to the end page. |
| Cookies used                                                                                                 | Indicate whether cookies were used to assign a unique user identifier to each client computer. If so, mention the page on which the cookie was set and read, and how long the cookie was valid. Were duplicate entries avoided by preventing users access to the survey twice; or were duplicate database entries having the same user ID eliminated before analysis? In the latter case, which entries were kept for analysis (eg, the first entry or the most recent)?                                                                                                   | N/A                                                                                       |
| IP check                                                                                                     | Indicate whether the IP address of the client computer was used to identify potential duplicate entries from the same user. If so, mention the period of time for which no two entries from the same IP address were allowed (eg, 24 hours). Were duplicate entries avoided by preventing users with the same IP address access to the survey twice; or were duplicate database entries having the same IP address within a given period of time eliminated before analysis? If the latter, which entries were kept for analysis (eg, the first entry or the most recent)? | 8                                                                                         |
| Log file analysis                                                                                            | Indicate whether other techniques to analyze the log file for identification of multiple entries were used. If so, please describe.                                                                                                                                                                                                                                                                                                                                                                                                                                        | N/A                                                                                       |
| Registration                                                                                                 | In “closed” (non-open) surveys, users need to login first and it is easier to prevent duplicate entries from the same user. Describe how this was done. For example, was the survey never displayed a second time once the user had filled it in, or was the username stored together with the survey results and later eliminated? If the latter, which entries were kept for analysis (eg, the first entry or the most recent)?                                                                                                                                          | N/A                                                                                       |



|                                                     |                                                                                                                                                                                                                                               |                   |
|-----------------------------------------------------|-----------------------------------------------------------------------------------------------------------------------------------------------------------------------------------------------------------------------------------------------|-------------------|
| Handling of incomplete questionnaires               | Were only completed questionnaires analyzed? Were questionnaires which terminated early (where, for example, users did not go through all questionnaire pages) also analyzed?                                                                 | 9,10 & Appendix 4 |
| Questionnaires submitted with an atypical timestamp | Some investigators may measure the time people needed to fill in a questionnaire and exclude questionnaires that were submitted too soon. Specify the timeframe that was used as a cut-off point, and describe how this point was determined. | 8                 |
| Statistical correction                              | Indicate whether any methods such as weighting of items or propensity scores have been used to adjust for the non-representative sample; if so, please describe the methods.                                                                  | N/A               |

This checklist has been modified from Eysenbach G. Improving the quality of Web surveys: the Checklist for Reporting Results of Internet E-Surveys (CHERRIES). J Med Internet Res. 2004 Sep 29;6(3):e34 [erratum in J Med Internet Res. 2012; 14(1): e8.]. Article available at <https://www.jmir.org/2004/3/e34/>; erratum available <https://www.jmir.org/2012/1/e8/>. Copyright ©Gunther Eysenbach. Originally published in the [Journal of Medical Internet Research](https://www.jmir.org/2004/3/e34/), 29.9.2004 and 04.01.2012.

This is an open-access article distributed under the terms of the Creative Commons Attribution License (<https://creativecommons.org/licenses/by/2.0/>), which permits unrestricted use, distribution, and reproduction in any medium, provided the original work, first published in the Journal of Medical Internet Research, is properly cited.

## Appendix 2 - Electronic survey

# Using technology to deliver the exercise component of cardiac rehabilitation

---

### Start of Block: Default Question Block

Background Information Cardiac Rehabilitation is a vital treatment for patients recovering from a cardiac event. Exercise is a core component of a comprehensive cardiac rehabilitation programme, however, the outbreak of Covid-19 has meant that patients in many countries can no longer attend assessments and exercise classes in person. As a consequence, healthcare services have had to adopt new ways of working to ensure that their patients continue to receive cardiac rehabilitation services. Anecdotal evidence suggests that some cardiac rehabilitation services have begun using technology to deliver their assessments, physical activity advice, and/or exercise programmes remotely. The Covid-19 outbreak may therefore represent a step-change in services capacity to use the technology when the disease is brought under control. This may provide an opportunity to increase participation in cardiac rehabilitation among those who are unable or unwilling to travel to centre-based cardiac rehabilitation. This brief survey is designed to help the British Association for Cardiovascular Prevention and Rehabilitation understand if, or how, technology is being used to deliver the exercise component of cardiac rehabilitation. It will also capture professional experiences of using technology to deliver exercise-based cardiac rehabilitation and obtain an estimate of the patient demographic that are engaging with alternative delivery methods of cardiac rehabilitation.

---

Page Break

1  
2  
3  
4  
5 Thank you for taking the time to complete our brief survey. It should take approximately 10 minutes  
6 to complete. We have asked you to complete this survey because you are involved in the delivery of  
7 exercise-based cardiac rehabilitation and we want to understand how your practice has changed in  
8 relation to the COVID-19 outbreak. By proceeding to the next page of the survey you are providing  
9 consent to take part in the study. Only information that is essential to answer our research question  
10 will be collected. Any information collected will be helpful, and will be processed in accordance with  
11 the General Data Protection Regulation (2018). If you would like to withdraw from the study, just  
12 exit the web page. We will keep the responses you have provide even if you don't complete the  
13 whole survey. If you would like any information about data protection or the study, please contact:  
14 Dr Simon Nichols Advanced Wellbeing Research Centre Collegiate Hall Collegiate Crescent  
15 Sheffield Hallam University S10 2BP s.j.nichols@shu.ac.uk  
16  
17  
18

19  
20  Next page (1)  
21  
22

23  
24  
25 Page Break  
26  
27  
28  
29  
30  
31  
32  
33  
34  
35  
36  
37  
38  
39  
40  
41  
42  
43  
44  
45  
46  
47  
48  
49  
50  
51  
52  
53  
54  
55  
56  
57  
58  
59  
60

1  
2  
3  
4  
5 Screening Q Have you previously completed this questionnaire?  
6  
7

8  Yes (1)  
9

10  No (2)  
11  
12  
13

14 Q1 Which phase of cardiac rehabilitation do you work in: (please tick the phase which you spend  
15 most of your time)  
16

17  Phase I (1)  
18

19  Phase II (2)  
20

21  Phase III (3)  
22

23  Phase IV (4)  
24  
25  
26  
27  
28  
29  
30

31 -----  
32  
33 Q2 Which country do you work in?  
34

35  England (1)  
36

37  Northern Ireland (2)  
38

39  Scotland (3)  
40

41  Wales (4)  
42

43  Non-UK (please state) (5) \_\_\_\_\_  
44  
45  
46  
47  
48  
49  
50

51 -----  
52 Page Break \_\_\_\_\_  
53  
54  
55  
56  
57  
58  
59  
60

1  
2  
3  
4  
5 Q3 Have you continued to provide exercise-based cardiac rehabilitation services during the COVID-  
6 19 outbreak?  
7  
8

- 9  Yes – We are able to see as many patients as we did before the COVID-19 outbreak (1)  
10  
11  Yes – But we aren't able to see as many patients as we did before the COVID-19 outbreak  
12 (2)  
13  
14  No – All services have been cancelled/there are no staff to run our programmes (3)  
15  
16  
17  
18  
19
- 

20  
21  
22 Q4 Since the COVID-19 outbreak, has your service found that:  
23  
24

- 25  The same number of patients are accessing exercise-based cardiac rehabilitation (1)  
26  
27  Fewer patients are accessing exercise-based cardiac rehabilitation (2)  
28  
29  No patients are accessing exercise-based cardiac rehabilitation (3)  
30  
31  
32  
33  
34
- 

35  
36 Page Break  
37  
38  
39  
40  
41  
42  
43  
44  
45  
46  
47  
48  
49  
50  
51  
52  
53  
54  
55  
56  
57  
58  
59  
60

1  
2  
3  
4  
5 Q5 Are the patients you are currently treating representative of the patients you would treat under  
6 normal circumstances, with respect to ethnicity?  
7

8  No - my patient population is less diverse (1)  
9

10  
11  Yes - my patient population is as diverse as normal (2)  
12

13  
14  No - my patient population is more diverse (3)  
15  
16  
17

18  
19  
20  
21  
22 Q6 Only answer this question if you are a UK centre. Approximately what percentage of the patients  
23 you saw in the last 7 days were White British?  
24

25 0 10 20 30 40 50 60 70 80 90 100

26  
27  
28 % of patients who were White British ( )  
29



35 Page Break  
36  
37  
38  
39  
40  
41  
42  
43  
44  
45  
46  
47  
48  
49  
50  
51  
52  
53  
54  
55  
56  
57  
58  
59  
60

1  
2  
3  
4  
5 Q7 Are the patients you are currently treating representative of the patients you would treat under  
6 normal circumstances, with respect to age?  
7

- 8  
9  No - my patient population is younger (1)  
10  
11  Yes - the age group of my patients is similar to normal (2)  
12  
13  No - my patient population is older (3)  
14  
15  
16

17  
18  
19  
20  
21 Q8 Approximately what percentage of the patients you saw in the last 7 days were over 65 years  
22 old?  
23



34  
35 Page Break  
36  
37  
38  
39  
40  
41  
42  
43  
44  
45  
46  
47  
48  
49  
50  
51  
52  
53  
54  
55  
56  
57  
58  
59  
60

1  
2  
3  
4  
5 Q9 Are the patients you are currently treating representative of the patients you would treat under  
6 normal circumstances, with respect to female participation?  
7

- 8  
9  No - the proportion of female participants is smaller (1)  
10  
11  Yes - the proportion of female participants is the same (2)  
12  
13  
14  No -the proportion of female participants is larger (3)  
15  
16  
17
- 

18  
19  
20  
21 Q10 Are the patients you are currently treating representative of the patients you would treat under  
22 normal circumstances, with respect to male participation?  
23

- 24  
25  No - the proportion of male participants is smaller (1)  
26  
27  Yes - the proportion of male participants is the same (2)  
28  
29  
30  No - the proportion of male participants is larger (3)  
31  
32  
33
- 

34  
35  
36  
37 Q11 Approximately what percentage of the patients you saw in the last 7 days were female?

38  
39 0 10 20 30 40 50 60 70 80 90 100

40  
41  
42  
43 % Female ( )  
44  
45  
46  
47  
48  
49



50 Page Break  
51  
52  
53  
54  
55  
56  
57  
58  
59  
60



1  
2  
3  
4  
5 Q12 Are you using any of the following technology to deliver a cardiac rehabilitation exercise  
6 assessment? (tick all that apply)  
7

8  Paper/postal services (1)  
9

10  
11  Telephone (2)  
12

13  
14  Text messaging (3)  
15

16  
17  E-mail (4)  
18

19  
20  Recorded video e.g. YouTube (5)  
21

22  
23  Live video conferencing e.g. Zoom, Skype, Microsoft Teams, Facebook (6)  
24

25  
26  Other (please state) (7) \_\_\_\_\_  
27  
28  
29

30  
31  
32  
33 Q13 How are you assessing functional capacity during your assessment? (tick all that apply)  
34

35  I am not assessing functional capacity (1)  
36

37  
38  Self-reported fitness (2)  
39

40  
41  Duke Activity Status Index/Other questionnaire (3)  
42

43  
44  Step count from patients own physical activity tracker (4)  
45

46  
47  Remotely supervised exercise test (please state which test) (5)  
48  
49 \_\_\_\_\_  
50

51  
52  Other (please state) (6) \_\_\_\_\_  
53  
54  
55  
56  
57  
58  
59  
60

1  
2  
3 Q14 Are you using any of the following technology to deliver the physical activity/exercise  
4 component of cardiac rehabilitation? (tick all that apply)  
5

6  Paper/postal services (1)  
7

8  Telephone (2)  
9

10  Text messaging (3)  
11

12  E-mail (4)  
13

14  Recorded video e.g. YouTube (5)  
15

16  Live video conferencing e.g. Zoom, Skype, Microsoft Teams, Facebook (6)  
17

18  Other (please state) (7) \_\_\_\_\_  
19  
20  
21  
22  
23  
24  
25

26  
27  
28  
29  
30 Page Break \_\_\_\_\_  
31  
32  
33  
34  
35  
36  
37  
38  
39  
40  
41  
42  
43  
44  
45  
46  
47  
48  
49  
50  
51  
52  
53  
54  
55  
56  
57  
58  
59  
60

1  
2  
3  
4  
5 Q15 Did you use this technology before the COVID-19 restrictions?  
6  
7

8  Yes (1)  
9

10  No (2)  
11  
12  
13



17  
18  
19 Q16 On approximately what date did you start using this technology?  
20  
21

22 \_\_\_\_\_  
23  
24 -----  
25

26  
27 Q17 If you used remote technology before the COVID-19 restrictions, have you found that:  
28

29  
30  The same number of patients are accessing exercise-based cardiac rehabilitation using  
31 technology (1)  
32

33  Fewer patients are accessing exercise-based cardiac rehabilitation using technology (2)  
34  
35

36  No patients are accessing exercise-based cardiac rehabilitation using technology (3)  
37  
38  
39

40 -----  
41 Page Break \_\_\_\_\_  
42  
43  
44  
45  
46  
47  
48  
49  
50  
51  
52  
53  
54  
55  
56  
57  
58  
59  
60

1  
2  
3  
4  
5 Q18 Are you able to use technology to deliver exercise-based cardiac rehabilitation to: (tick all that  
6 apply)  
7

8  Low risk patients (1)  
9

10  
11  Moderate risk patients (2)  
12

13  
14  High risk patients (3)  
15  
16

17  
18  
19  
20  
21  
22 Q19 I am able to offer physical activity recommendations to patients that have not had an  
23 assessment in person? (i.e. in the same room as the assessor)  
24

25  Yes (1)  
26

27  
28  No (2)  
29  
30

31  
32  
33  
34  
35 Q20 I am able to offer an exercise prescription to patients that have not had an assessment in  
36 person? (i.e. in the same room as the assessor)  
37

38  
39  Yes (1)  
40

41  
42  No (2)  
43  
44

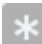

48  
49  
50  
51 Q21 Can you briefly describe what kind of physical activity recommendations you are making and/or  
52 exercises you are prescribing?  
53

54 Examples may include chair-based exercise, resistance bands, walking, running on the spot and body  
55 weight exercises.  
56

57  
58 \_\_\_\_\_  
59 \_\_\_\_\_  
60

1  
2  
3  
4  
5  
6  
7  
8  
9  
10  
11  
12  
13  
14  
15  
16  
17  
18  
19  
20  
21  
22  
23  
24  
25  
26  
27  
28  
29  
30  
31  
32  
33  
34  
35  
36  
37  
38  
39  
40  
41  
42  
43  
44  
45  
46  
47  
48  
49  
50  
51  
52  
53  
54  
55  
56  
57  
58  
59  
60

---

---

---

-----  
Page Break

---

For peer review only

1  
2  
3  
4  
5 Q22 How many supervised physical activity/exercise training sessions can a patient attend, each  
6 week?  
7  
8

9 \_\_\_\_\_  
10  
11 -----  
12  
13

14 Q23 Are the physical activity/exercise sessions you are supervising: (tick all that apply)  
15

16  Group exercise (1)  
17  
18

19  One-on-one (2)  
20  
21  
22  
23  
24 -----  
25



26  
27  
28 Q24 How long is each supervised physical activity/exercise session? Please provide your answer in  
29 minutes.  
30  
31

32 \_\_\_\_\_  
33  
34 -----  
35

36 Page Break \_\_\_\_\_  
37  
38  
39  
40  
41  
42  
43  
44  
45  
46  
47  
48  
49  
50  
51  
52  
53  
54  
55  
56  
57  
58  
59  
60

1  
2  
3  
4  
5  
6  
7  
8  
9  
10  
11  
12  
13  
14  
15  
16  
17  
18  
19  
20  
21  
22  
23  
24  
25  
26  
27  
28  
29  
30  
31  
32  
33  
34  
35  
36  
37  
38  
39  
40  
41  
42  
43  
44  
45  
46  
47  
48  
49  
50  
51  
52  
53  
54  
55  
56  
57  
58  
59  
60  
\*

Q25 How many unsupervised physical activity/exercise training sessions are you prescribing for a patient, each week?

---

\*  
For peer review only

Q26 How long is each unsupervised physical activity/exercise session? Please provide your answer in minutes.

---

Page Break

---

1  
2  
3  
4  
5 Q27 What intensity range do you recommend/prescribe? (tick all that apply)  
6  
7  
8  
9  
10

11  Low (e.g. RPE 11) (1)  
12

13  Moderate (e.g. RPE 13) (2)  
14

15  High (e.g. RPE 15) (3)  
16  
17  
18  
19  
20  
21

---

22  
23  
24 Q28 Is this intensity: (Tick one option only)  
25

26  Lower than normal (1)  
27

28  The same as normal (2)  
29

30  Higher than normal (3)  
31  
32  
33  
34  
35  
36

---

37 Page Break  
38  
39  
40  
41  
42  
43  
44  
45  
46  
47  
48  
49  
50  
51  
52  
53  
54  
55  
56  
57  
58  
59  
60



1  
2  
3  
4  
5 29 Do you think that the programmes you are providing are: (Tick one option only)  
6  
7

8  More effective than normal (1)  
9

10  As effective as normal (2)  
11  
12

13  Less effective than normal (3)  
14  
15  
16

17 -----  
18 Page Break  
19  
20  
21  
22  
23  
24  
25  
26  
27  
28  
29  
30  
31  
32  
33  
34  
35  
36  
37  
38  
39  
40  
41  
42  
43  
44  
45  
46  
47  
48  
49  
50  
51  
52  
53  
54  
55  
56  
57  
58  
59  
60

1  
2  
3  
4  
5 Q30 What barriers have you encountered when using technology to deliver cardiac rehabilitation?  
6 (tick all that apply)  
7

- 8  No barriers (1)  
9  
10  
11  Patients have no internet connection (2)  
12  
13  
14  Patients do not have access to computers/tablets/smart phone (3)  
15  
16  
17  Patients are not confident in using technology (4)  
18  
19  
20  Patients are concerned about personal safety (5)  
21  
22  
23  Patient lack of interest in receiving services using technology (6)  
24  
25  
26  My Trust/Health Board /employer do not support the delivery of health services using  
27 technology (7)  
28  
29  
30  Internet security and patient confidentiality concerns (8)  
31  
32  
33  Professionals are not confident in delivering services using technology (9)  
34  
35  
36  Professionals are concerned about patient safety (10)  
37  
38  
39  Other (please specify) (11) \_\_\_\_\_  
40  
41  
42  
43

44  
45 Page Break \_\_\_\_\_  
46  
47  
48  
49  
50  
51  
52  
53  
54  
55  
56  
57  
58  
59  
60

1  
2  
3  
4  
5 Q31 How many adverse events resulting in minor injury have been reported since you have started  
6 delivering cardiac rehabilitation remotely? Please only report incidents that are related to  
7 exercise-based cardiac rehabilitation.  
8  
9

10 \_\_\_\_\_  
11  
12 -----  
13  
14 Page Break \_\_\_\_\_  
15  
16  
17  
18  
19  
20  
21  
22  
23  
24  
25  
26  
27  
28  
29  
30  
31  
32  
33  
34  
35  
36  
37  
38  
39  
40  
41  
42  
43  
44  
45  
46  
47  
48  
49  
50  
51  
52  
53  
54  
55  
56  
57  
58  
59  
60

For peer review only

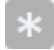

Q32 How many adverse events resulting in life changing injury have been reported since you have started delivering cardiac rehabilitation remotely? Please only report incidents that are related to exercise-based cardiac rehabilitation.

---

Page Break

For peer review only

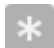

1  
2  
3  
4  
5  
6  
7  
8  
9  
10  
11  
12  
13  
14  
15  
16  
17  
18  
19  
20  
21  
22  
23  
24  
25  
26  
27  
28  
29  
30  
31  
32  
33  
34  
35  
36  
37  
38  
39  
40  
41  
42  
43  
44  
45  
46  
47  
48  
49  
50  
51  
52  
53  
54  
55  
56  
57  
58  
59  
60

Q33 How many adverse events resulting in death have been reported since you have started delivering cardiac rehabilitation remotely? Please only report incidents that are related to exercise-based cardiac rehabilitation.

---

---

Page Break

---

For peer review only

1  
2  
3  
4  
5  
6  
7  
8  
9  
10  
11  
12  
13  
14  
15  
16  
17  
18  
19  
20  
21  
22  
23  
24  
25  
26  
27  
28  
29  
30  
31  
32  
33  
34  
35  
36  
37  
38  
39  
40  
41  
42  
43  
44  
45  
46  
47  
48  
49  
50  
51  
52  
53  
54  
55  
56  
57  
58  
59  
60

Q34 Do you think that the way you are using technology now should be an option for patients in your future standard practice?

- Yes (1)
- No (2)

-----  
Page Break

---

For peer review only

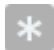

Q35 Is there anything else you would like to tell us about your experience or approaches to delivering exercise-based cardiac rehabilitation using remote technology? (500 characters max)

---

---

---

---

---

End of Block: Default Question Block

---

For peer review only

### Appendix 3 - Recruitment material

Appendix 3a - E-mail to BACPR members on 2<sup>nd</sup> and 25<sup>th</sup> of June 2020

BACPR Survey - Use of remote technology to deliver the exercise component of cardiac rehabilitation.

Dear Member,

The outbreak of Covid-19 has meant that patients in many countries can no longer attend assessments and exercise classes in person. As a consequence, many healthcare services have had to adopt new ways of working to ensure that their patients continue to receive cardiac rehabilitation services. Anecdotal evidence suggests that some cardiac rehabilitation services have begun to use technology to deliver their assessments, physical activity advice, and/or exercise programmes, remotely. The Covid-19 outbreak may therefore represent a step-change in services capacity to use the technology when the disease is brought under control. This may provide an opportunity to increase participation in cardiac rehabilitation among those who are unable or unwilling to travel to centre-based cardiac rehabilitation, in the long-term.

To help improve the provision of cardiac rehabilitation in the future, we would be extremely grateful if you could take 10 minutes to complete a brief survey which will help the British Association for Cardiovascular Prevention and Rehabilitation understand if, or how, technology is being used to deliver the exercise component of cardiac rehabilitation. It will also capture your professional experiences of using technology to deliver exercise-based cardiac rehabilitation and obtain an estimate of the patient demographic that are engaging with alternative delivery methods of cardiac rehabilitation. The findings of the study will be disseminated through the BACPR as well as conferences, scientific publications, and if appropriate, training courses.

The survey can be completed on a desktop computer or a smart phone, and will take approximately 10 minutes. To proceed to the survey, [click here](#).

Thank you for taking the time to consider taking part in this study.

Best wishes

Dr Simon Nichols



1  
2  
3 Simon Nichols  
4  
5

6  
7 BACPR Scientific Chair

8  
9 British Association for Cardiovascular Prevention & Rehabilitation

10  
11 c/o BCS, 9 Fitzroy Square,

12  
13 London

14  
15 W1T 5HW

16  
17 www.bacpr.com  
18  
19  
20  
21

22 **Appendix 3b** - Example Twitter advert posted on Twitter by the study authors on June 3<sup>rd</sup> 2020  
23  
24

25  
26 RT #COVID19 is an unprecedented challenge to #cardiacrehab Please tell us if/how you are using  
27 technology to deliver the exercise component of CR by completing this 10 minute survey Down  
28 pointing backhand index

29 [https://shusls.eu.qualtrics.com/jfe/form/SV\\_eEgCIDLGhsAE7Fr?Q\\_CHL=social&Q\\_SocialSource=twitter](https://shusls.eu.qualtrics.com/jfe/form/SV_eEgCIDLGhsAE7Fr?Q_CHL=social&Q_SocialSource=twitter)  
30 er @bacpr @A\_ODoherty @susandawkes @aynsleycowie @drtom\_butler @SHU\_PAWPH  
31  
32  
33  
34  
35

36 Example advert posted by the BACPR Exercise Instructor Network on their Facebook page, on 8<sup>th</sup>  
37 June 2020  
38  
39  
40

41 **Appendix 3c** - Calling all BACPR Members please check your email inboxes!!  
42

43 We would greatly appreciate your help in completing our survey regarding the use of remote  
44 technology to deliver the exercise component of Cardiac Rehab. The findings of this study will be  
45 disseminated through the BACPR, conferences & scientific publications.  
46  
47  
48  
49  
50  
51  
52  
53  
54  
55  
56  
57  
58  
59  
60

| Question                                                                                                                                                                                                                                                                                    | Results reported in Manuscript | Phase I Responses | Phase II Responses | Phase III Responses | Phase IV Responses | Total Responses |
|---------------------------------------------------------------------------------------------------------------------------------------------------------------------------------------------------------------------------------------------------------------------------------------------|--------------------------------|-------------------|--------------------|---------------------|--------------------|-----------------|
| Q1 Which phase of cardiac rehabilitation do you work in: (please tick the phase which you spend most of your time)                                                                                                                                                                          | Yes – Page 7                   | 14                | 29                 | 164                 | 123                | 330             |
| Q2) Which country do you work in?                                                                                                                                                                                                                                                           | Yes – Page 7                   | 14                | 29                 | 164                 | 123                | 330             |
| Q3) Have you continued to provide exercise-based cardiac rehabilitation services during the COVID-19 outbreak?                                                                                                                                                                              | Yes – Page 8 & Table 1         | 14                | 29                 | 164                 | 123                | 330             |
| <b>The following questions are applicable to a maximum of 167 respondents due to 163 programmes stating that their service had been suspended</b>                                                                                                                                           |                                |                   |                    |                     |                    |                 |
| Q4 Since the COVID-19 outbreak, has your service found that:<br>-The same number of patients are accessing exercise-based cardiac rehabilitation<br>-Fewer patients are accessing exercise-based cardiac rehabilitation<br>-No patients are accessing exercise-based cardiac rehabilitation | Yes – Page 8 & Table 1         | 8                 | 17                 | 102                 | 34                 | 161             |
| Q5 Are the patients you are currently treating representative of the patients you would treat under normal circumstances, with respect to ethnicity?                                                                                                                                        | Yes – Page 8 & Table 1         | 7                 | 16                 | 95                  | 33                 | 151             |
| Q6 <u>Only answer this question if you are a UK centre.</u> Approximately what percentage of the patients you saw in the last 7 days were White British?                                                                                                                                    | Yes – Page 8 & Table 1         | 5                 | 5                  | 83                  | 30                 | 123             |
| Q7 Are the patients you are currently treating representative of the patients you would treat under normal circumstances, with respect to age?                                                                                                                                              | Yes – Page 8 & Table 1         | 7                 | 15                 | 92                  | 32                 | 146             |
| Q8 Approximately what percentage of the patients you saw in the last 7 days were over 65 years old?                                                                                                                                                                                         | Yes – Page 8 & Table 1         | 7                 | 13                 | 88                  | 31                 | 139             |
| Q9 Are the patients you are currently treating representative of the                                                                                                                                                                                                                        | Yes – Page 8 & Table 1         | 6                 | 15                 | 85                  | 29                 | 135             |

|    |                                                                                                                                                                |                          |   |    |    |    |
|----|----------------------------------------------------------------------------------------------------------------------------------------------------------------|--------------------------|---|----|----|----|
| 1  | patients you would treat under normal circumstances, with respect to female participation?                                                                     |                          |   |    |    |    |
| 2  |                                                                                                                                                                |                          |   |    |    |    |
| 3  |                                                                                                                                                                |                          |   |    |    |    |
| 4  | Q10 Are the patients you are currently treating representative of the patients you would treat under normal circumstances, with respect to male participation? | Yes – Table 1            | 6 | 15 | 85 | 29 |
| 5  |                                                                                                                                                                |                          |   |    |    |    |
| 6  |                                                                                                                                                                |                          |   |    |    |    |
| 7  |                                                                                                                                                                |                          |   |    |    |    |
| 8  |                                                                                                                                                                |                          |   |    |    |    |
| 9  | Q11 Approximately what percentage of the patients you saw in the last 7 days were <u>female</u> ?                                                              | Yes – Page 8 & Table 1   | 6 | 14 | 77 | 28 |
| 10 |                                                                                                                                                                |                          |   |    |    |    |
| 11 |                                                                                                                                                                |                          |   |    |    |    |
| 12 | Q12 Are you using any of the following technology to deliver a cardiac rehabilitation exercise <u>assessment</u> ?                                             | Yes – Page 9 & Figure 2  | 6 | 14 | 84 | 29 |
| 13 |                                                                                                                                                                |                          |   |    |    |    |
| 14 |                                                                                                                                                                |                          |   |    |    |    |
| 15 |                                                                                                                                                                |                          |   |    |    |    |
| 16 | Q13 How are you assessing functional capacity during your assessment?                                                                                          | Yes – Page 9             | 6 | 14 | 84 | 29 |
| 17 |                                                                                                                                                                |                          |   |    |    |    |
| 18 |                                                                                                                                                                |                          |   |    |    |    |
| 19 | Q14 Are you using any of the following technology to <u>deliver</u> the physical activity/exercise component of cardiac rehabilitation?                        | Yes – Page 11 & Figure 3 | 6 | 14 | 84 | 29 |
| 20 |                                                                                                                                                                |                          |   |    |    |    |
| 21 |                                                                                                                                                                |                          |   |    |    |    |
| 22 |                                                                                                                                                                |                          |   |    |    |    |
| 23 | Q15 Did you use this technology before the COVID-19 restrictions?                                                                                              | Yes - Page 8             | 6 | 14 | 81 | 27 |
| 24 |                                                                                                                                                                |                          |   |    |    |    |
| 25 | Date of technology adoption                                                                                                                                    | Yes – Page 8             | 5 | 14 | 80 | 27 |
| 26 | Q17 If you used remote technology before the COVID-19 restrictions, have you found that:                                                                       | No                       | 6 | 7  | 44 | 8  |
| 27 |                                                                                                                                                                |                          |   |    |    |    |
| 28 |                                                                                                                                                                |                          |   |    |    |    |
| 29 |                                                                                                                                                                |                          |   |    |    |    |
| 30 | -The same number of patients are accessing exercise-based cardiac rehabilitation using technology                                                              |                          |   |    |    |    |
| 31 |                                                                                                                                                                |                          |   |    |    |    |
| 32 | -Fewer patients are accessing exercise-based cardiac rehabilitation using technology                                                                           |                          |   |    |    |    |
| 33 |                                                                                                                                                                |                          |   |    |    |    |
| 34 | -No patients are accessing exercise-based cardiac rehabilitation using technology                                                                              |                          |   |    |    |    |
| 35 |                                                                                                                                                                |                          |   |    |    |    |
| 36 |                                                                                                                                                                |                          |   |    |    |    |
| 37 |                                                                                                                                                                |                          |   |    |    |    |
| 38 |                                                                                                                                                                |                          |   |    |    |    |
| 39 |                                                                                                                                                                |                          |   |    |    |    |
| 40 |                                                                                                                                                                |                          |   |    |    |    |
| 41 |                                                                                                                                                                |                          |   |    |    |    |
| 42 |                                                                                                                                                                |                          |   |    |    |    |
| 43 |                                                                                                                                                                |                          |   |    |    |    |
| 44 |                                                                                                                                                                |                          |   |    |    |    |
| 45 |                                                                                                                                                                |                          |   |    |    |    |
| 46 |                                                                                                                                                                |                          |   |    |    |    |

|    |                                                                                                                                                                |               |   |    |    |    |     |
|----|----------------------------------------------------------------------------------------------------------------------------------------------------------------|---------------|---|----|----|----|-----|
| 1  | Q18 Are you able to use technology to deliver exercise-based cardiac rehabilitation to:                                                                        | Yes – Page 11 | 6 | 12 | 79 | 26 | 123 |
| 2  | -Low risk patients                                                                                                                                             |               |   |    |    |    |     |
| 3  | -Moderate risk patients                                                                                                                                        |               |   |    |    |    |     |
| 4  | -High risk patients                                                                                                                                            |               |   |    |    |    |     |
| 5  |                                                                                                                                                                |               |   |    |    |    |     |
| 6  |                                                                                                                                                                |               |   |    |    |    |     |
| 7  |                                                                                                                                                                |               |   |    |    |    |     |
| 8  |                                                                                                                                                                |               |   |    |    |    |     |
| 9  |                                                                                                                                                                |               |   |    |    |    |     |
| 10 | Q19 I am able to offer <u>physical activity recommendations</u> to patients that have not had an assessment in person? (i.e. in the same room as the assessor) | Yes – Page 11 | 6 | 12 | 79 | 26 | 123 |
| 11 |                                                                                                                                                                |               |   |    |    |    |     |
| 12 |                                                                                                                                                                |               |   |    |    |    |     |
| 13 |                                                                                                                                                                |               |   |    |    |    |     |
| 14 |                                                                                                                                                                |               |   |    |    |    |     |
| 15 | Q20 I am able to offer an <u>exercise prescription</u> to patients that have not had an assessment in person? (i.e. in the same room as the assessor)          | Yes – Page 11 | 6 | 12 | 79 | 26 | 123 |
| 16 |                                                                                                                                                                |               |   |    |    |    |     |
| 17 |                                                                                                                                                                |               |   |    |    |    |     |
| 18 |                                                                                                                                                                |               |   |    |    |    |     |
| 19 |                                                                                                                                                                |               |   |    |    |    |     |
| 20 | Q21 Can you briefly describe what kind of physical activity recommendations you are making and/or exercises you are prescribing?                               | No            | 6 | 7  | 44 | 8  | 65  |
| 21 |                                                                                                                                                                |               |   |    |    |    |     |
| 22 |                                                                                                                                                                |               |   |    |    |    |     |
| 23 |                                                                                                                                                                |               |   |    |    |    |     |
| 24 |                                                                                                                                                                |               |   |    |    |    |     |
| 25 | Q22 How many supervised physical activity/exercise training sessions can a patient attend, each week?                                                          | No            | 6 | 11 | 72 | 26 | 115 |
| 26 |                                                                                                                                                                |               |   |    |    |    |     |
| 27 |                                                                                                                                                                |               |   |    |    |    |     |
| 28 | Q23 Are the physical activity/exercise sessions you are supervising:                                                                                           | No            | 5 | 8  | 24 | 24 | 61  |
| 29 | Group exercise                                                                                                                                                 |               |   |    |    |    |     |
| 30 | One-on-one                                                                                                                                                     |               |   |    |    |    |     |
| 31 |                                                                                                                                                                |               |   |    |    |    |     |
| 32 |                                                                                                                                                                |               |   |    |    |    |     |
| 33 |                                                                                                                                                                |               |   |    |    |    |     |
| 34 | Q24 How long is each <u>supervised</u> physical activity/exercise session? Please provide your answer in minutes.                                              | No            | 5 | 8  | 25 | 26 | 64  |
| 35 |                                                                                                                                                                |               |   |    |    |    |     |
| 36 |                                                                                                                                                                |               |   |    |    |    |     |
| 37 |                                                                                                                                                                |               |   |    |    |    |     |
| 38 | Q25 How many <u>unsupervised</u> physical activity/exercise training sessions are you prescribing for a patient, each week?                                    | No            | 5 | 10 | 70 | 24 | 109 |
| 39 |                                                                                                                                                                |               |   |    |    |    |     |
| 40 |                                                                                                                                                                |               |   |    |    |    |     |
| 41 |                                                                                                                                                                |               |   |    |    |    |     |
| 42 |                                                                                                                                                                |               |   |    |    |    |     |

|    |                                                                                                                                                                       |                                          |   |   |    |    |     |
|----|-----------------------------------------------------------------------------------------------------------------------------------------------------------------------|------------------------------------------|---|---|----|----|-----|
| 1  | Q26 How long is each unsupervised physical activity/exercise session? Please provide your answer in minutes.                                                          | No                                       | 4 | 9 | 56 | 12 | 81  |
| 2  |                                                                                                                                                                       |                                          |   |   |    |    |     |
| 3  |                                                                                                                                                                       |                                          |   |   |    |    |     |
| 4  |                                                                                                                                                                       |                                          |   |   |    |    |     |
| 5  | Q27 What intensity range do you recommend/prescribe?                                                                                                                  | No                                       | 6 | 9 | 70 | 24 | 109 |
| 6  |                                                                                                                                                                       |                                          |   |   |    |    |     |
| 7  | Q28 Is this intensity                                                                                                                                                 | No                                       | 6 | 9 | 70 | 24 | 109 |
| 8  | Q29 Do you think that the programmes you are providing are:                                                                                                           | No                                       | 6 | 9 | 70 | 24 | 109 |
| 9  |                                                                                                                                                                       |                                          |   |   |    |    |     |
| 10 | Q30 What barriers have you encountered when using technology to deliver cardiac rehabilitation? (tick all that apply)                                                 | Yes – Page 11 & Table 2                  | 6 | 9 | 68 | 24 | 107 |
| 11 |                                                                                                                                                                       |                                          |   |   |    |    |     |
| 12 |                                                                                                                                                                       |                                          |   |   |    |    |     |
| 13 |                                                                                                                                                                       |                                          |   |   |    |    |     |
| 14 | Q31 How many adverse events resulting in minor injury have been reported since you have started delivering cardiac rehabilitation remotely?                           | Yes – Page 11                            | 6 | 9 | 68 | 24 | 107 |
| 15 |                                                                                                                                                                       |                                          |   |   |    |    |     |
| 16 |                                                                                                                                                                       |                                          |   |   |    |    |     |
| 17 |                                                                                                                                                                       |                                          |   |   |    |    |     |
| 18 |                                                                                                                                                                       |                                          |   |   |    |    |     |
| 19 | Q32 How many adverse events resulting in life changing injury have been reported since you have started delivering cardiac rehabilitation remotely?                   | Yes – Page 11                            | 6 | 9 | 68 | 24 | 107 |
| 20 |                                                                                                                                                                       |                                          |   |   |    |    |     |
| 21 |                                                                                                                                                                       |                                          |   |   |    |    |     |
| 22 |                                                                                                                                                                       |                                          |   |   |    |    |     |
| 23 |                                                                                                                                                                       |                                          |   |   |    |    |     |
| 24 | Q33 How many adverse events resulting in death have been reported since you have started delivering cardiac rehabilitation remotely?                                  | Yes – Page 11                            | 6 | 9 | 68 | 24 | 107 |
| 25 |                                                                                                                                                                       |                                          |   |   |    |    |     |
| 26 |                                                                                                                                                                       |                                          |   |   |    |    |     |
| 27 |                                                                                                                                                                       |                                          |   |   |    |    |     |
| 28 |                                                                                                                                                                       |                                          |   |   |    |    |     |
| 29 |                                                                                                                                                                       |                                          |   |   |    |    |     |
| 30 | Q34 Do you think that the way you are using technology now should be an option for patients in your future standard practice?                                         | Yes – Page 15                            | 6 | 8 | 68 | 24 | 106 |
| 31 |                                                                                                                                                                       |                                          |   |   |    |    |     |
| 32 |                                                                                                                                                                       |                                          |   |   |    |    |     |
| 33 |                                                                                                                                                                       |                                          |   |   |    |    |     |
| 34 | Q35 Is there anything else you would like to tell us about your experience or approaches to delivering exercise-based cardiac rehabilitation using remote technology? | Yes – Qualitative synthesis; Pages 12-15 | 1 | 4 | 39 | 13 | 57  |
| 35 |                                                                                                                                                                       |                                          |   |   |    |    |     |
| 36 |                                                                                                                                                                       |                                          |   |   |    |    |     |
| 37 |                                                                                                                                                                       |                                          |   |   |    |    |     |
| 38 |                                                                                                                                                                       |                                          |   |   |    |    |     |
| 39 |                                                                                                                                                                       |                                          |   |   |    |    |     |
| 40 |                                                                                                                                                                       |                                          |   |   |    |    |     |
| 41 |                                                                                                                                                                       |                                          |   |   |    |    |     |
| 42 |                                                                                                                                                                       |                                          |   |   |    |    |     |
| 43 |                                                                                                                                                                       |                                          |   |   |    |    |     |
| 44 |                                                                                                                                                                       |                                          |   |   |    |    |     |
| 45 |                                                                                                                                                                       |                                          |   |   |    |    |     |
| 46 |                                                                                                                                                                       |                                          |   |   |    |    |     |

# BMJ Open

## How has technology been used to deliver cardiac rehabilitation during the COVID-19 pandemic? An international cross-sectional survey of healthcare professionals conducted by the BACPR.

|                                 |                                                                                                                                                                                                                                                                                                                                                                                                                                                                                                                                                                                                                                                                                                                                                                                                        |
|---------------------------------|--------------------------------------------------------------------------------------------------------------------------------------------------------------------------------------------------------------------------------------------------------------------------------------------------------------------------------------------------------------------------------------------------------------------------------------------------------------------------------------------------------------------------------------------------------------------------------------------------------------------------------------------------------------------------------------------------------------------------------------------------------------------------------------------------------|
| Journal:                        | <i>BMJ Open</i>                                                                                                                                                                                                                                                                                                                                                                                                                                                                                                                                                                                                                                                                                                                                                                                        |
| Manuscript ID                   | bmjopen-2020-046051.R2                                                                                                                                                                                                                                                                                                                                                                                                                                                                                                                                                                                                                                                                                                                                                                                 |
| Article Type:                   | Original research                                                                                                                                                                                                                                                                                                                                                                                                                                                                                                                                                                                                                                                                                                                                                                                      |
| Date Submitted by the Author:   | 29-Mar-2021                                                                                                                                                                                                                                                                                                                                                                                                                                                                                                                                                                                                                                                                                                                                                                                            |
| Complete List of Authors:       | O'Doherty, Alasdair; Northumbria University, Department of Sport, Exercise and Rehabilitation<br>Humphreys, Helen; Sheffield Hallam University, Sport and Physical Activity Research Centre; Sheffield Hallam University, Advanced Wellbeing Research Centre<br>Dawkes, Susan; Edinburgh Napier University,<br>Cowie, Aynsley ; University Hospital Crosshouse, Cardiac Rehabilitation<br>Hinton, Sally; British Association for Cardiovascular Prevention and Rehabilitation<br>Brubaker, Peter; Wake Forest University, Department of Health and Exercise Science<br>Butler, Tom; Edge Hill University Faculty of Health and Social Care<br>Nichols, Simon; Sheffield Hallam University, Sport and Physical Activity Research Group; Sheffield Hallam University, Advanced Wellbeing Research Centre |
| <b>Primary Subject Heading</b>: | Cardiovascular medicine                                                                                                                                                                                                                                                                                                                                                                                                                                                                                                                                                                                                                                                                                                                                                                                |
| Secondary Subject Heading:      | Rehabilitation medicine, Sports and exercise medicine, Public health, Health services research, Cardiovascular medicine                                                                                                                                                                                                                                                                                                                                                                                                                                                                                                                                                                                                                                                                                |
| Keywords:                       | REHABILITATION MEDICINE, Telemedicine < BIOTECHNOLOGY & BIOINFORMATICS, COVID-19, Adult cardiology < CARDIOLOGY                                                                                                                                                                                                                                                                                                                                                                                                                                                                                                                                                                                                                                                                                        |
|                                 |                                                                                                                                                                                                                                                                                                                                                                                                                                                                                                                                                                                                                                                                                                                                                                                                        |

SCHOLARONE™  
Manuscripts



I, the Submitting Author has the right to grant and does grant on behalf of all authors of the Work (as defined in the below author licence), an exclusive licence and/or a non-exclusive licence for contributions from authors who are: i) UK Crown employees; ii) where BMJ has agreed a CC-BY licence shall apply, and/or iii) in accordance with the terms applicable for US Federal Government officers or employees acting as part of their official duties; on a worldwide, perpetual, irrevocable, royalty-free basis to BMJ Publishing Group Ltd ("BMJ") its licensees and where the relevant Journal is co-owned by BMJ to the co-owners of the Journal, to publish the Work in this journal and any other BMJ products and to exploit all rights, as set out in our [licence](#).

The Submitting Author accepts and understands that any supply made under these terms is made by BMJ to the Submitting Author unless you are acting as an employee on behalf of your employer or a postgraduate student of an affiliated institution which is paying any applicable article publishing charge ("APC") for Open Access articles. Where the Submitting Author wishes to make the Work available on an Open Access basis (and intends to pay the relevant APC), the terms of reuse of such Open Access shall be governed by a Creative Commons licence – details of these licences and which [Creative Commons](#) licence will apply to this Work are set out in our licence referred to above.

Other than as permitted in any relevant BMJ Author's Self Archiving Policies, I confirm this Work has not been accepted for publication elsewhere, is not being considered for publication elsewhere and does not duplicate material already published. I confirm all authors consent to publication of this Work and authorise the granting of this licence.

1  
2  
3 1 **How has technology been used to deliver cardiac rehabilitation during the COVID-19 pandemic? An**  
4 2 **international cross-sectional survey of healthcare professionals conducted by the BACPR**  
5  
6 3  
7

8 4 Alasdair F. O'Doherty<sup>1</sup>, Helen Humphreys<sup>2,3</sup>, Susan Dawkes<sup>4,5</sup>, Aynsley Cowie<sup>6,5</sup>, Sally Hinton<sup>5</sup>, Peter  
9 5 Brubaker<sup>7</sup>, Tom Butler<sup>8,5</sup>, Simon Nichols<sup>2,3,5\*</sup>  
10  
11 6

12  
13 7 <sup>1</sup>Department of Sport Exercise and Rehabilitation, Northumbria University, Newcastle upon Tyne NE1  
14 8 8QH, United Kingdom, [alasdair.odoherty@northumbria.ac.uk](mailto:alasdair.odoherty@northumbria.ac.uk)  
15

16  
17 9 <sup>2</sup>Advanced Wellbeing Research Centre, Sheffield Hallam University, Sheffield, S9 3TY, United Kingdom,  
18 10 [H.Humphreys@shu.ac.uk](mailto:H.Humphreys@shu.ac.uk); [s.j.nichols@shu.ac.uk](mailto:s.j.nichols@shu.ac.uk)  
19

20  
21 11 <sup>3</sup>Sport and Physical Activity Research Centre, Sheffield Hallam University, Sheffield, S10 2BP, United  
22 12 Kingdom, [H.Humphreys@shu.ac.uk](mailto:H.Humphreys@shu.ac.uk); [s.j.nichols@shu.ac.uk](mailto:s.j.nichols@shu.ac.uk)  
23

24  
25 13 <sup>4</sup>School of Health and Social Care, Edinburgh Napier University, Edinburgh, EH11 4BN, United  
26 14 Kingdom, [s.dawkes@napier.ac.uk](mailto:s.dawkes@napier.ac.uk)  
27

28  
29 15 <sup>5</sup>British Association for Cardiovascular Prevention and Rehabilitation, Farnham, GU9 8BB, United  
30 16 Kingdom, [shinton@bacpr.com](mailto:shinton@bacpr.com)  
31

32  
33 17 <sup>6</sup>University Hospital Crosshouse, NHS Ayrshire & Arran, Kilmarnock, KA2 OBE, United Kingdom,  
34 18 [aynsleycowie@nhs.net](mailto:aynsleycowie@nhs.net)  
35

36  
37 19 <sup>7</sup>Department of Health and Exercise Science, Wake Forest University, Winston-Salem, NC 27109,  
38 20 United States of America, [brubaker@wfu.edu](mailto:brubaker@wfu.edu)  
39

40  
41 21 <sup>8</sup>Faculty of Health, Social Care and Medicine, Edge Hill University, Ormskirk, United Kingdom,  
42 22 [butlert@edgehill.ac.uk](mailto:butlert@edgehill.ac.uk)  
43

44  
45 23  
46  
47 24 \*Corresponding author – Dr Simon Nichols: e-mail [s.j.nichols@shu.ac.uk](mailto:s.j.nichols@shu.ac.uk); tel 01142 254327  
48  
49 25  
50  
51 26

52  
53 27 **Words – 3325**  
54  
55 28  
56  
57 29  
58  
59  
60



1  
2  
3 30 **Abstract**  
4  
5

6 31 **Objective:** To investigate whether exercise-based cardiac rehabilitation services continued during the  
7  
8 32 COVID-19 pandemic, and investigate how technology has been used to deliver home-based cardiac  
9  
10 33 rehabilitation.  
11  
12

13 34 **Design:** A mixed methods survey, including questions about exercise-based cardiac rehabilitation  
14  
15 35 service provision, programme diversity, patient complexity, technology use, barriers to using  
16  
17 36 technology, and safety.  
18  
19

20  
21 37 **Setting:** International survey of exercise-based cardiac rehabilitation programmes  
22  
23

24 38 **Participants:** Healthcare professionals working in exercise-based cardiac rehabilitation programmes,  
25  
26 39 worldwide.  
27  
28

29 40 **Main outcome measures:** The proportion of programmes that continued providing exercise-based  
30  
31 41 cardiac rehabilitation, and which technologies had been used to deliver home-based cardiac  
32  
33 42 rehabilitation.  
34  
35

36 43 **Results:** Three-hundred and thirty eligible responses were received; 89.7% were from the UK.  
37  
38 44 Approximately half (49.3%) of respondents reported that CR programmes were suspended due to  
39  
40 45 COVID-19. Of programmes that continued; 25.8% used technology before the COVID-19 pandemic.  
41  
42 46 Programmes typically started using technology within 19 days of COVID-19 becoming a pandemic.  
43  
44 47 48.8% did not provide CR to high-risk patients, telephone was most commonly used to deliver CR, and  
45  
46 48 some centres used sophisticated technology such as teleconferencing.  
47  
48

49 49 **Conclusions:** The rapid adoption of technology into standard practice is promising and may improve  
50  
51 50 accessibility, or participation, in exercise-based CR beyond COVID-19. However, the exclusion of  
52  
53 51 certain patient groups and programme suspension, could worsen clinical symptoms and wellbeing,  
54  
55 52 and increase hospital admissions. Refinement of current practices, with a focus on improving  
56  
57  
58  
59  
60

1  
2  
3 53 inclusivity and addressing safety concerns around exercise support to high-risk patients, may be  
4  
5 54 needed.  
6  
7  
8 55  
9  
10  
11 56  
12  
13  
14 57  
15  
16  
17 58  
18  
19  
20 59  
21  
22  
23 60  
24  
25  
26 61  
27  
28  
29 62  
30  
31 63  
32  
33  
34 64  
35  
36  
37 65  
38  
39  
40 66  
41  
42  
43 67  
44  
45  
46 68  
47  
48  
49 69  
50  
51  
52 70  
53  
54  
55 71  
56  
57  
58 72  
59  
60

For peer review only

1  
2  
3 73 **Abstract: 233 Words**  
4  
5

6 74 **Key words: Cardiac rehabilitation, COVID-19, Telehealth, Exercise training,**  
7  
8

9 75  
10  
11

12 76 **Article Summary**  
13  
14

15 77 **Strengths and limitations of this study**  
16  
17

18 78 • This is the first international reporting on the effect that COVID-19 restrictions have had on  
19  
20 79 exercise-based cardiac rehabilitation.

21  
22 80 • We report data from  $n=330$  cardiac rehabilitation programmes around the world, although  
23  
24 81 the majority of data were from the United Kingdom.

25  
26 82 • Our mixed methods survey enabled us to investigate how technology has been used to deliver  
27  
28 83 exercise-based cardiac rehabilitation, as well the barriers to using technology.

29  
30 84 • Respondents were only able to complete the survey once, but we could have received more  
31  
32 85 than one response from professionals working in a single cardiac rehabilitation programme.

33  
34 86 • Our data could be used to inform future research agendas, international healthcare policy,  
35  
36 87 and local healthcare decision making.  
37  
38  
39  
40

41 88  
42

43 89 **Financial support**  
44

45 90 This research received no specific grant from any funding agency in the public, commercial or not-for-  
46  
47 91 profit sectors  
48  
49

50 92

51 93 **Competing interests**  
52

53 94 SN has received funding from Research England, via the Advanced Wellbeing Research Centre  
54

55  
56 95 Accelerator, to evaluate the effect of a technology platform for cardiac rehabilitation developed by  
57

58 96 Aseptika Ltd. SN, AFO, AC, and HH have received funding from AstraZeneca to investigate factors  
59  
60

1  
2  
3 97 influencing uptake on to cardiac rehabilitation. SN, SD, TB, and AC are members of the BACPR Council.  
4  
5 98 SD received funding from the Burdett Trust to investigate uptake on to exercise referral schemes. SD  
6  
7 99 participated in cardiovascular prevention advisory board for AstraZeneca. SH is Executive Director of  
8  
9 100 the British Association for Cardiovascular Prevention and Rehabilitation (BACPR). PB has received  
10  
11 101 funding from the National Institute of Health for Cardiac Rehabilitation-related research. PB has also  
12  
13 102 received consultation fees and honoraria from Merck, Ingelheim Boehringer, Corvia Medical, and  
14  
15 103 Boston Scientific.  
16  
17  
18  
19  
20  
21  
22  
23  
24  
25  
26  
27  
28  
29  
30  
31  
32  
33  
34  
35  
36  
37  
38  
39  
40  
41  
42  
43  
44  
45  
46  
47  
48  
49  
50  
51  
52  
53  
54  
55  
56  
57  
58  
59  
60

For peer review only

## 119 **Introduction**

120 Cardiac rehabilitation (CR) is a comprehensive programme of secondary prevention interventions for  
121 patients with heart disease, encompassing support for psychosocial health, medical risk management  
122 and cardiovascular risk factor modification, including exercise training [1]. Exercise-based CR reduces  
123 cardiovascular deaths and recurrent myocardial infarction within 10 years, hospital admissions within  
124 2 years, and improves health-related quality of life [2-5]. Despite these benefits, only 49% (n=141,648)  
125 of eligible United Kingdom (UK) patients enrolled on to a CR programme between 2012 and 2015 [6].  
126 Increasing uptake to 65% could lead to 21,000 fewer hospital admissions and 8,500 fewer deaths over  
127 10 years [7]. In response, NHS England set an ambitious target to increase CR uptake to 85% by 2029  
128 [8].

129 COVID-19 is spread by a highly contagious virus. As of September 2020, it has infected 26,121,999 and  
130 has killed 864,618 people worldwide [9]. The rapid spread of COVID-19 infections resulted in  
131 governments imposing restrictions on face-to-face human contact [10]. Numerous 'non-essential'  
132 healthcare services were suspended and patient attendance to continuing services has decreased due  
133 to fear of contracting COVID-19 [11, 12]. The COVID-19 pandemic may therefore undermine efforts to  
134 increase uptake to exercise-based CR.

135 Before COVID-19, expanding the availability of home-based programmes was recommended to  
136 increase participation in exercise-based CR [13]. This is partly due to a lack of capacity within existing  
137 face-to-face services [14]. Yet, in 2019, 8.8% of UK CR patients participated in home-based  
138 programmes [15]. The recent suspension of face-to-face healthcare services may have led to  
139 programmes rapidly adopting home-based, technology facilitated services. Data from urgent and non-  
140 urgent care centres in the United States of America (USA) reported that teleconferencing  
141 consultations increased from 82 on March 4<sup>th</sup> 2020, to 1336 on 19<sup>th</sup> March 2020 [16]. If a similar rate  
142 of technology adoption occurred in CR, this could have helped to maintain patient participation. These  
143 methods could also be adopted in to future standard practice to increase accessibility and subsequent  
144 uptake onto CR programmes.

1  
2  
3 145 The aim of this mixed-methods survey, conducted in collaboration with the British Association for  
4  
5 146 Cardiovascular Prevention and Rehabilitation (BACPR), was to investigate whether exercise-based CR  
6  
7 147 services continued during the COVID-19 pandemic. We also evaluated whether technology was used  
8  
9 148 to deliver exercise-based CR, and the professional experiences of this technology, during the COVID-  
10  
11 149 19 pandemic.  
12  
13  
14  
15 150  
16  
17

## 18 151 **Materials and Methods**

### 19 152 *Survey development*

20  
21  
22  
23 153 The methods and results are reported in conjunction with the Checklist for Reporting Results of  
24  
25 154 Internet E-surveys (CHERRIES; Appendix 1) [17]. This voluntary, cross-sectional, international, open  
26  
27 155 survey, targeted at a convenience sample of healthcare professionals in exercise-based CR, was  
28  
29 156 developed by SN and AFO. The broad topic of questions, relating to the COVID-19 pandemic, were:

- 30  
31  
32 157 1. If and how CR services were provided.
- 33  
34 158 2. The demographics and medical complexity of patients accessing CR services.
- 35  
36 159 3. How technology was used to undertake patient assessments and deliver the exercise component  
37  
38 160 of CR.
- 39  
40 161 4. The barriers encountered when using technology to deliver the exercise component of CR.

41  
42  
43  
44 162  
45  
46  
47 163 The survey was reviewed by the members of the BACPR elected Council prior to ethical approval, and  
48  
49 164 amended accordingly. The BACPR council includes physicians, nurses, physiotherapists, exercise  
50  
51 165 physiologists, exercise instructors, psychologists, dietitians, and occupational therapists. The resulting  
52  
53 166 35-item questionnaire was uploaded to the Qualtrics<sup>XM</sup> online survey platform (Provo, Utah, USA).  
54  
55 167 Qualtrics has ISO/IEC 27001 security certification. The automated database was password protected  
56  
57 168 and stored on secure Qualtrics and Sheffield Hallam University servers. The survey was presented  
58  
59  
60

1  
2  
3 169 across 21 pages, including background information and consent. There were 22 tick box items (19  
4  
5 170 mandatory), seven mandatory numerical responses, three non-mandatory sliding bar responses, two  
6  
7  
8 171 non-mandatory free-text responses, and one mandatory date entry response. Four questions also  
9  
10 172 permitted free-text responses under the option 'other'. Response validation was used on all questions,  
11  
12 173 where appropriate. Survey progress was displayed on each page. Participants did not have a  
13  
14 174 completeness check/review option at the end of the survey. Participants were only able to visit the  
15  
16 175 website once from the same IP address, and they had seven days to complete the survey once started.  
17  
18  
19 176 The functionality of the survey was tested by SN, AOD, SD, SH, and AC. The final version of the online  
20  
21 177 survey (Appendix 2), was given institutional ethical approval by Sheffield Hallam University (ID:  
22  
23 178 ER24303491), on the 29<sup>th</sup> May 2020. All participants provided informed consent, and all study  
24  
25 179 procedures were carried out following the rules of the Declaration of Helsinki of 1975  
26  
27  
28 180 (<https://www.wma.net/what-we-do/medical-ethics/declaration-of-helsinki/>), revised in 2013.  
29  
30  
31 181

### 32 182 *Patient and public involvement*

34 183 Patients and/or the public were not involved in the design, or conduct, or reporting or dissemination  
35  
36 184 plans of this research.  
37  
38  
39  
40 185

### 42 186 *Survey dissemination*

45 187 On 2<sup>nd</sup> June 2020, a recruitment e-mail was sent to BACPR members; 746 healthcare professionals and  
46  
47 188 academics working in CR. This was repeated on June 25<sup>th</sup> 2020. The survey was also promoted on  
48  
49  
50 189 social media platforms (Appendix 3). A link to the survey *was not* posted on any website. The survey  
51  
52 190 closed at 12pm on 31<sup>st</sup> July 2020. There were no incentives offered for participation.  
53  
54  
55 191  
56  
57  
58 192  
59  
60

1  
2  
3 193 *Quantitative data analysis*  
4  
5

6 194 Categorical data are reported as the number of responses, expressed as a percentage (%) of the  
7  
8 195 respondents to each question. Continuous data are reported as median, with minimum and maximum  
9  
10 196 values. Responses were reported for the full cohort, and by the Phase of CR that the respondents  
11  
12 197 worked in. Phase I was defined as the inpatient stage, Phase II as the early discharge phase, Phase III  
13  
14 198 as a clinically supervised outpatient programme, and Phase IV as long-term physical activity  
15  
16 199 maintenance. The number of responses to each question varied and are detailed in Tables 1 and 2,  
17  
18 200 and Appendix 4. Tests of statistical significance were not conducted.  
19  
20  
21  
22  
23  
24

25  
26  
27  
28  
29  
30  
31  
32  
33  
34  
35  
36  
37  
38  
39  
40  
41  
42  
43  
44  
45  
46  
47  
48  
49  
50  
51  
52  
53  
54  
55  
56  
57  
58  
59  
60

201

202 *Qualitative Data analysis*

203 Free text answers were exported into NVivo 11 software for thematic analysis. Answers were coded  
204 inductively. The resulting coding framework was then reviewed to identify patterns and themes in  
205 the data. Similar codes were grouped to form lower order themes, which were then grouped into  
206 higher order themes. Each theme was given a descriptive explanation with illustrative quotes.

207

208 **Results**

209 *Responses*

210 Four-hundred and seven visits to the survey site were recorded. Seventy-seven (18.9%) did not  
211 progress past the study information and consent page (81.1% participation rate). Three-hundred and  
212 thirty responses were analysed, 296 (89.7%) were from the UK. The remaining responses were from  
213 Japan ( $n=8$ ; 2.4%), Australia ( $n=4$ ; 1.2%), the USA ( $n=4$ ; 1.2%), Republic of Ireland ( $n=4$ ; 1.2%), Gibraltar  
214 ( $n=2$ ; 0.6%), India ( $n=2$ ; 0.6%), South Africa ( $n=2$ ; 0.6%), Spain ( $n=2$ ; 0.6%), the Bailiwick of Guernsey  
215 ( $n=1$ ; 0.3%), Canada ( $n=1$ ; 0.3%), the Isle of Man ( $n=1$ ; 0.3%), and Kuwait  $n=1$ ; (0.3%).

216



1  
2  
3 217 *Service provision during COVID-19*  
4

5 218 At the time of responding, 163 (49.3%) CR programmes had been suspended due to COVID-19 (Table  
6  
7 219 1). The proportion of UK ( $n=147$ ; 49.7%) and non-UK ( $n=16$ ; 47.1%) services that had been suspended  
8  
9 220 were similar. Phase IV programmes were most likely to have suspended all activities ( $n=89$ ; 72.4%;  
10  
11 221 Table 1). The remaining questions in the survey were applicable to a maximum of 167 respondents.  
12  
13  
14 222 The number of responses to each question can be seen Table 1 and Appendix 4.  
15

16  
17 223 Following COVID-19 restrictions, 32 (19.9%) programmes reported that the same volume of patients  
18  
19 224 were choosing to access their service (Table 1). Most programmes reported that either fewer patients  
20  
21 225 ( $n=111$ ; 68.9%), or no patients ( $n=18$ ; 11.2%) were choosing to access their service (Table 1).  
22  
23 226 Programmes believed that patients enrolling in CR were either as demographically as diverse' ( $n=122$ ;  
24  
25 227 80.8%), or more diverse, than normal ( $n=7$ ; 4.6%; Table 1). UK CR programmes also estimated that  
26  
27 228 90.4% (0.0 to 100.0%) of patients seen in the last seven days were 'White British'. Most CR  
28  
29 229 programmes (92.5%) reported that the age of participants was similar to normal, with 70% (0.0 to  
30  
31 230 100.0%) of patients enrolling in CR >65 years of age (Table 1). Programmes also reported that the sex  
32  
33 231 of patients participating in CR was proportionally similar to normal. Female participation in CR was  
34  
35 232 estimated at 30% (0.0 to 80%; Table 1).  
36  
37  
38  
39

40 233

41 234 *Technology adoption*  
42  
43  
44

45 235 Figure 1 shows the increase in adoption of technology over time. The earliest date that a programme  
46  
47 236 reported using technology was the 10<sup>th</sup> January 2010. The latest was the 20<sup>th</sup> June 2020. Thirty-three  
48  
49 237 (25.8%) used technology to deliver exercise-based CR before COVID-19 was declared a pandemic by  
50  
51 238 the World Health Organisation (WHO) [18]. The median date of technology adoption was 30<sup>th</sup> March  
52  
53 239 2020. There were notable increases in technology adoption, the first coincided with the release of the  
54  
55 240 UK's NHS long-term plan [8]. The second, more rapid increase, coincides with COVID-19 pandemic  
56  
57 241 [18].  
58  
59  
60

1  
2  
3 242 *Technology use in patient assessment*  
4  
5

6 243 The most commonly used technology was telephone ( $n=113$ ; 85.0%; Figure 2). 24.1% ( $n=32$ ) of  
7  
8 244 programmes reported that they were not assessing or estimating functional capacity. Practitioners  
9  
10 245 mostly relied on patient self-reported fitness to estimate functional capacity ( $n=92$ ; 69.2%). Some  
11  
12 246 programmes estimated functional capacity by using a questionnaire (26.3%,  $n=35$ ), or the patient's  
13  
14 247 own physical activity tracker (21.1%,  $n=28$ ). One Phase I (16.7%), two phase II (14.3%), and four Phase  
15  
16 248 IV CR programmes (13.8%) remotely supervised exercise testing (Figure 2).  
17  
18  
19  
20  
21  
22  
23  
24  
25  
26  
27  
28  
29  
30  
31  
32  
33  
34  
35  
36  
37  
38  
39  
40  
41  
42  
43  
44  
45  
46  
47  
48  
49  
50  
51  
52  
53  
54  
55  
56  
57  
58  
59  
60

Table 1 – Provision of cardiac rehabilitation services during the COVID-19 pandemic, displayed as number (%)

|                                                                          | All                 | Phase I             | Phase II             | Phase III           | Phase IV            |
|--------------------------------------------------------------------------|---------------------|---------------------|----------------------|---------------------|---------------------|
| <b>Service status</b>                                                    | (n=330)             | (n=14)              | (n=29)               | (n=164)             | (n=123)             |
| Services able to see as many patients as usual                           | 44 (13.3)           | 2 (14.3)            | 6 (20.7)             | 30 (18.3)           | 6 (4.9)             |
| Service able to see fewer patients                                       | 123 (37.3)          | 6 (42.9)            | 12 (41.4)            | 77 (47.0)           | 28 (22.8)           |
| Service suspended (%)                                                    | 163 (49.4)          | 7 (42.9)            | 11 (37.9)            | 57 (34.8)           | 89 (72.4)           |
| <b>Patients accessing cardiac rehabilitation</b>                         | (n=161)             | (n=8)               | (n=17)               | (n=102)             | (n=34)              |
| No patients are accessing the service                                    | 18 (11.2)           | 2 (25.0)            | 3 (17.6)             | 9 (8.8)             | 4 (11.8)            |
| Fewer patients are accessing the service                                 | 111 (68.9)          | 5 (62.5)            | 13 (76.5)            | 65 (63.7)           | 28 (82.4)           |
| Same number of patients are accessing the service                        | 32 (19.9)           | 1 (12.5)            | 1 (5.9)              | 28 (27.5)           | 2 (5.9)             |
| <b>Diversity of cardiac rehabilitation</b>                               | (n=151)             | (n=7)               | (n=16)               | (n=95)              | (n=33)              |
| Patient population is less diverse than before COVID-19                  | 22 (14.6)           | 3 (42.9)            | 1 (6.25)             | 13 (13.7)           | 5 (15.2)            |
| Patient population is as diverse as it was before COVID-19               | 122 (80.8)          | 4 (57.1)            | 15 (93.8)            | 78 (82.1)           | 25 (75.8)           |
| Patient population is more diverse than before COVID-19                  | 7 (4.6)             | 0 (0.0)             | 0 (0.0)              | 4 (4.2)             | 3 (9.1)             |
| Patient population is younger than before COVID-19                       | 6 (4.1)             | 0 (0.0)             | 2 (13.3)             | 2 (2.2)             | 2 (6.3)             |
| Patient population is similar to what it was before COVID-19             | 135 (92.5)          | 5 (71.4)            | 12 (80.0)            | 89 (96.7)           | 29 (90.6)           |
| Patient population is older than before COVID-19                         | 5 (3.4)             | 2 (28.6)            | 1 (6.7)              | 1 (1.1)             | 1 (3.1)             |
| Estimated percentage of patients in the last 7 days that were >65 years? | 70.0 (0.0 to 100.0) | 75.0 (60.0 to 85.0) | 67.0 (38.0 to 100.0) | 64.5 (0.0 to 100.0) | 80.0 (0.0 to 100.0) |
| Proportion of female participation is smaller                            | 11 (0.8)            | 1 (16.7)            | 0 (0.0)              | 8 (9.4)             | 2 (6.9)             |
| Proportion of female participation is the same                           | 113 (83.7)          | 4 (66.7)            | 14 (93.3)            | 69 (81.2)           | 26 (89.7)           |
| Proportion of female participation is larger                             | 11 (0.8)            | 1 (16.7)            | 1 (6.7)              | 8 (9.4)             | 1 (3.4)             |
| Proportion of male participation is smaller                              | 6 (4.4)             | 1 (16.7)            | 1 (6.7)              | 2 (2.4)             | 2 (7.0)             |
| Proportion of male participation is the same                             | 123 (91.1)          | 4 (66.7)            | 14 (93.3)            | 79 (92.9)           | 26 (89.7)           |
| Proportion of male participation is larger                               | 6 (4.4)             | 1 (16.7)            | 0 (0.0)              | 4 (4.7)             | 1 (3.4)             |
| Estimated percentage of patients in the last 7 days were female?         | 30.0 (0.0 to 80.0)  | 40.0 (10.0 to 70.0) | 30.0 (1.0 to 57.0)   | 30.0 (0.0 to 80.0)  | 40.0 (1.0 to 73.0)  |

### 249 *Technology use in physical activity and exercise prescription*

250 Most services were able to provide physical activity advice ( $n=102$ ; 82.9%). Seventy-two (58.5%)  
251 programmes also offered structured exercise training programmes. Telephone remained the most  
252 commonly used technology to facilitate the physical activity or exercise component of CR ( $n=86$ ,  
253 64.7%; Figure 3). Pre-recorded online videos ( $n=69$ ; 51.9%) were also widely used, particularly among  
254 Phase III programmes ( $n=54$ ; 64.3%; Figure 3). Most CR services were able to provide physical activity  
255 or structured exercise training to patients at low ( $n=117$ ; 95.1%) and moderate risk ( $n=109$ ; 88.6%) of  
256 exercise-induced cardiac events. Half (51.2%;  $n=63$ ) were able to offer services to patients at high-risk  
257 of exercise-induced cardiac events. Three (2.8%) programmes reported one adverse event resulting in  
258 minor injury whilst using technology to deliver the exercise component of CR (three events in total).  
259 There were no reports of life changing injury, or death.

260

### 261 *Barriers to using technology*

262 The number of responses to each question about barriers to using technology is shown in Table 2.  
263 Respondents were asked to state *any* barriers that they encountered when using technology. Only  
264 two (1.9%) programmes reported 'no barriers' (Table 2). Most ( $n=93$ ; 86.9%) encountered a "lack of  
265 patient confidence" with technology (Table 2). Qualitative analysis of the barriers to using technology  
266 fell into two categories; logistical and organisational barriers, and patient-related barriers. Logistical  
267 and organisational barriers were largely a result of healthcare organisations being unprepared, and  
268 not familiar with using online healthcare delivery. Onerous governance processes or delayed access  
269 to the necessary IT equipment were also described. Patient-related barriers were associated with  
270 communication (either language or understanding), and concerns that patients were either over-  
271 reporting their activity or not following advice provided.

272

1  
2  
3 273 *Practitioner experiences*  
4  
5

6 274 Qualitative analysis of free text answers to the final question allowing “Any other comments” resulted  
7  
8 275 in the identification of three higher order themes; i) impact on patient experience; ii) challenges for  
9  
10 276 staff and iii) implications for future delivery.  
11  
12

13 277  
14  
15

16 278 i) Impact on patient experience  
17  
18

19 279 Survey respondents varied in their views about the impact on patient engagement and experience.  
20

21 280 Technology was acknowledged as a valuable means of connecting patients with CR staff, but a small  
22  
23 281 number of respondents also highlighted that it was harder to establish a rapport this way. One  
24  
25 282 participant reported a decline in patients’ fitness outcomes whilst another claimed that patients  
26  
27 283 exercised harder at home without peers to distract them. More commonly, participants reported that  
28  
29 284 regardless of the perceived benefits of remote delivery, it was difficult to replicate the social benefits  
30  
31 285 associated with group exercise delivery:  
32  
33  
34

35 286  
36  
37

38 287 *“The lack of contact with other patients means the patients miss out on the social and*  
39  
40 288 *emotional support from each other.”*  
41  
42  
43  
44  
45  
46  
47  
48  
49  
50  
51  
52  
53  
54  
55  
56  
57  
58  
59  
60

Table 2 –Barriers to using technology in exercise-based cardiac rehabilitation displayed as number (%)

| Barriers to using technology                                                       | All (n=107) | Phase I (n=6) | Phase II (n=9) | Phase III (n=68) | Phase IV (n=24) |
|------------------------------------------------------------------------------------|-------------|---------------|----------------|------------------|-----------------|
| Lack of patient confidence                                                         | 93 (86.9)   | 2 (33.3)      | 8 (88.9)       | 60 (88.2)        | 23 (95.8)       |
| Patients do not have access to computers/tablets/smart phone                       | 86 (80.4)   | 2 (33.3)      | 4 (44.4)       | 61 (89.7)        | 19 (79.2)       |
| Patients do not have an internet connection                                        | 73 (68.2)   | 2 (33.3)      | 6 (66.7)       | 48 (70.6)        | 17 (70.8)       |
| Patients lack of interest in receiving services using technology                   | 65 (60.7)   | 1 (16.7)      | 5 (55.6)       | 44 (64.7)        | 15 (62.5)       |
| Professionals are concerned about patient safety                                   | 43 (40.2)   | 0 (0.0)       | 3 (33.3)       | 34 (50.0)        | 6 (25.0)        |
| Patients are concerned about safety                                                | 32 (29.9)   | 2 (33.3)      | 3 (33.3)       | 21 (30.9)        | 6 (25.0)        |
| Internet security and patient confidentiality concerns                             | 27 (25.2)   | 1 (16.7)      | 4 (44.4)       | 18 (25)          | 4 (16.7)        |
| Professionals not confident delivering service using technology                    | 24 (22.4)   | 0 (0.0)       | 2 (22.2)       | 19 (27.9)        | 3 (12.5)        |
| Trust/Health Board do not support the delivery of health services using technology | 16 (15.0)   | 1 (16.7)      | 0 (0.0)        | 14 (20.6)        | 1 (4.2)         |
| No barriers                                                                        | 2 (1.9)     | 1 (11.1)      | 0 (0.0)        | 1 (1.5)          | 0 (0.0)         |

1  
2  
3 227 ii) Challenges for professionals  
4  
5

6 228 Survey participants cited a range of challenges to adoption of technology, including the limitations of  
7  
8 229 existing platforms, such as smart device applications for CR. These were described as lacking patient-  
9  
10 230 centred or motivational content and time-consuming to use. Participants reported further difficulties  
11  
12 231 associated with COVID-19 related staff redeployment or illness, and reiterated barriers such as lack of  
13  
14 232 access to technology and organisational delays caused by IT and governance restrictions.  
15  
16

17  
18 233 A large number of comments described concerns relating to practitioners' inability to observe  
19  
20 234 patients, limiting safe and accurate assessment of functional capacity. This had resulted in a more  
21  
22 235 cautious approach, with respondents reporting that they prescribed only gentle or low-level exercise:  
23  
24

25 236 *"Our main concern has been the difficulty of not being able to complete functional capacity*  
26  
27 237 *assessments, we have therefore recommended patients exercise at a lower level than we*  
28  
29 238 *normally would."*  
30  
31

32  
33 239

34 240 iii) Implications for future delivery  
35  
36

37 241 Many respondents reported optimism about continuing to incorporate technology in future CR  
38  
39 242 delivery. Nevertheless, it was generally recognised that delivery should be flexible. Exercise  
40  
41 243 programmes should be tailored to individual needs and risk levels and patients should be provided  
42  
43 244 with a range of options for engaging with CR, including both face-to-face contact with CR staff and  
44  
45 245 online/home-based exercise.  
46  
47

48  
49 246 Several comments indicated opportunities for improvement in the technology available, with one  
50  
51 247 participant suggesting that current formats were driven by NACR audit data requirements as opposed  
52  
53 248 to patient needs. Another respondent called for further research to inform more confident remote  
54  
55 249 exercise prescription:  
56  
57  
58  
59  
60

1  
2  
3 227 *“Still feel face to face assessment is superior for more frail patients ...and for higher risk patients...*  
4  
5 228 *Nevertheless, I am gaining more confidence in remote assessment, and would be reassured further by*  
6  
7 229 *some research to demonstrate its safety and efficacy. I already know remote delivery has been shown*  
8  
9 230 *to be safe and effective, but as far as I am aware this has been evidenced only when prescribed from*  
10  
11 231 *face to face assessment.”*  
12  
13  
14

15 232

16  
17  
18 233 Quantitatively, 94 (88.7%) programmes believed that technology should be available for patients in  
19  
20 234 the future.  
21  
22

23 235

## 26 236 **Discussion**

27  
28  
29 237 To our knowledge, this is the first study to quantitatively document the effect that restrictions,  
30  
31 238 imposed due to COVID-19, had on exercise-based CR programmes. We found that nearly half of all  
32  
33 239 programmes had been suspended and that most centres reported a reduction in patient engagement  
34  
35 240 with services during the COVID-19 pandemic. Practitioners reported that the age and sex of patients  
36  
37 241 attending CR was similar to before the COVID-19 pandemic. Technology was rapidly adopted to deliver  
38  
39 242 CR, with less sophisticated technology, such as the telephone, being most widely used. Higher risk  
40  
41 243 patients were less likely to be offered remote CR using technology. Nearly all centres reported barriers  
42  
43 244 to using technology to deliver CR. Finally, despite an openness to adopting technology by practitioners,  
44  
45 245 there were concerns surrounding availability of, and confidence in using technology. Qualitatively,  
46  
47 246 patient assessment, less opportunity for socialisation, and safety were highlighted.  
48  
49  
50

51 247

### 55 248 *Service provision*

56  
57  
58 249 COVID-19 has resulted in many non-essential healthcare services being suspended. We have shown  
59  
60 250 that this was true for half of exercise-based CR services. In 2019, 89,573 patients accessed exercise-



1  
2  
3 227 based CR in the UK [15], therefore a high proportion of cardiac patients may have been negatively  
4  
5 228 affected by this widespread service disruption. Given that exercise-based CR improves quality of life  
6  
7  
8 229 [4, 19] and reduces hospital admissions [3], suspension of services is likely to result in worsening  
9  
10 230 clinical symptoms, wellbeing, and increased hospital admissions long-term. This may place an  
11  
12 231 increased burden on healthcare services in the coming months. Nevertheless, there was an increase  
13  
14 232 in the use of technology in CR shortly after COVID-19 was declared a Pandemic by the WHO [18].  
15  
16 233 Comparing long-term patient outcomes from programmes that continued service provision with  
17  
18 234 programmes that were unable to continue will help to determine the effectiveness of these changes.  
19  
20  
21  
22  
23  
24

#### 25 236 *Technology adoption and barriers*

26  
27 237 Recent editorials and reviews have suggested that COVID-19 could be a catalyst for large-scale  
28  
29 238 changes in the way that CR is delivered [20, 21]. We found that most services started using technology  
30  
31 239 to deliver home-based exercise-based CR within three weeks of COVID-19 being declared a pandemic  
32  
33 240 by the WHO [18], only three services were providing face-to-face services. This suggests that the  
34  
35 241 capacity of CR services to provide home-based rehabilitation programmes has rapidly increased. If  
36  
37 242 maintained, subject to robust evidence, the potential for increased accessibility, could positively  
38  
39 243 influence participation in CR when face-to-face service have resumed.  
40  
41  
42  
43

44 244 Traditional modes of communication such as telephone were most commonly used. Surprisingly few  
45  
46 245 services used tele-conferencing, smart device applications and web-based systems. Healthcare  
47  
48 246 professionals cited that patients often lacked confidence using equipment and/or that patients did  
49  
50 247 not have the required equipment for technology use. The number and sociodemographic profile of  
51  
52 248 patients for whom this was a genuine barrier is unclear. Others have reported that age may be a factor,  
53  
54 249 with people aged 22-44 years most likely use tele-conferencing facilities [16], and people over 65 years  
55  
56 250 being less likely to have a smart phone [22]. This could warrant further investigation to address  
57  
58 251 inequalities in the accessibility of technology-based provision of CR. Meanwhile, professionals'

1  
2  
3 227 concern for patient safety (40.2%) and internet security (25.2%) were also likely to contribute to the  
4  
5 228 low uptake of novel technology. Healthcare organisations being underprepared for the adoption of  
6  
7 229 new technology may also play a role, although this was less frequently reported in quantitative  
8  
9 230 analysis. 'Top-down' endorsement of technology by health Trusts, Health Boards or healthcare  
10  
11 231 providers may give healthcare professionals confidence in using technology.  
12  
13  
14  
15 232

### 17 233 *Participation*

18  
19  
20 234 Participation in CR continued despite COVID-19 restrictions. However, programmes were able to offer  
21  
22 235 services to fewer patients and uptake was reduced. Furthermore, UK programmes reported that ~90%  
23  
24 236 of participants were 'White British', which is proportionately higher than recently indicated (79%) in  
25  
26 237 the 2019 NACR report [15]. Future research should investigate the direct impact of COVID-19 on  
27  
28 238 minority group participation in exercise-based CR, and explore how to increase their participation  
29  
30 239 when it is delivered using technology. Encouragingly, programmes reported that similar proportions  
31  
32 240 of males and females, and people over the age of 65 years, engaged with CR compared to pre-COVID-  
33  
34 241 19 participation.

35  
36  
37 242 Data from our survey showed that 41.5% of programmes were unable to provide exercise-based CR  
38  
39 243 to patients at high-risk of exercise-induced cardiac events. CR should be available to all eligible  
40  
41 244 patients, irrespectively of risk [1]. The development and refinement of future technology-based  
42  
43 245 interventions should be inclusive of all risk levels. Qualitative comments highlighted concerns about  
44  
45 246 using technology to remotely deliver exercise-based CR for frail patients. Safety concerns were also a  
46  
47 247 common feature in our quantitative analysis (Table 2). The wide use of 'offline' delivery modes such  
48  
49 248 as telephone and pre-recorded videos identified in our survey limits the capacity to evaluate  
50  
51 249 physiological information during exercise and the scope for practitioners to tailor advice to the  
52  
53 250 individual. It may be perceived as unsafe for patients at high-risk of exercise-induced event, but not  
54  
55  
56  
57  
58  
59  
60

1  
2  
3 227 for lower risk patients. Overcoming these concerns, through robust evidence, may be an important  
4  
5 228 step in negating future health inequalities.  
6  
7

8 229

9  
10  
11 230 *Limitations*  
12

13  
14 231 The high UK response rate to our survey ( $n=296$ ; 89.7%) makes it likely that our findings are  
15  
16 232 representative of CR in the UK. However, the response rate from CR programmes outside of the UK  
17  
18 233 was low. The generalisability of our findings to the rest of the world may therefore be limited.  
19  
20 234 Additionally, we aimed to recruit healthcare professionals rather than patients. Future research  
21  
22 235 should investigate patient perceptions of using technology in CR so that a more complete  
23  
24 236 understanding of barriers can be reported. We also asked study participants to report on whether  
25  
26 237 they perceived that certain demographics of the patients engaging with their services had changed,  
27  
28 238 therefore we cannot exclude information bias. Finally, individual practitioners rather than centres  
29  
30 239 were targeted to respond. Therefore, the risk of bias could have been increased by multiple  
31  
32 240 practitioners from the same centre completing the survey.  
33  
34  
35

36  
37 241

38  
39  
40 242 *Conclusions*  
41

42  
43 243 Nearly half of all CR programmes have been suspended during COVID-19 restrictions. Technology was  
44  
45 244 rapidly adopted by CR services which may increase participation beyond COVID-19. However, higher  
46  
47 245 risk patients may be disadvantaged by technology use, whilst people in the UK who are 'White British'  
48  
49 246 may be most likely to benefit for it. Our findings indicate a role for technology in future CR delivery.  
50  
51 247 There is a need for innovation in patient-centred, interactive technological resources that also foster  
52  
53 248 confidence amongst practitioners. Future research needs to investigate the longer-term adoption of  
54  
55 249 technology in CR following COVID-19, and its effects on participation, patient experience and safety.  
56  
57  
58  
59  
60

1  
2  
3 244 **Author Statement**  
4  
5

6 245 **Conceptualization:** Simon Nichols; **Methodology:** Simon Nichols, Alasdair O'Doherty, Helen  
7  
8 246 Humphreys, Susan Dawkes, Aynsley Cowie, Sally Hinton; **Formal Analysis:** Simon Nichols, Alasdair  
9  
10 247 O'Doherty, Helen Humphreys; **Investigation:** Simon Nichols, Alasdair O'Doherty, Helen Humphreys,  
11  
12 248 Susan Dawkes, Aynsley Cowie, Sally Hinton, Peter Brubaker, Tom Butler; **Data curation:** Simon Nichols,  
13  
14 249 Helen Humphreys; **Writing- Original draft preparation:** Simon Nichols; **Writing - Review & Editing:**  
15  
16 250 Simon Nichols, Alasdair O'Doherty, Helen Humphreys, Susan Dawkes, Aynsley Cowie, Sally Hinton,  
17  
18 251 Peter Brubaker, Tom Butler; **Visualization:** Simon Nichols; **Supervision:** Simon Nichols; **Project**  
19  
20 252 **Administration:** Simon Nichols  
21  
22  
23  
24  
25 253  
26  
27  
28 254 **Acknowledgements**

29  
30 255 The authors would like to thank the healthcare professionals who completed the survey and the  
31  
32 256 BACPR committee for reviewing the design of the survey. We would also like to thank the individuals  
33  
34 257 involved in promoting the survey within their networks.  
35  
36  
37  
38 258

39 259 **Patient and public involvement**

40 260 Patients and/or the public were not involved in the design, or conduct, or reporting or dissemination  
41  
42 261 plans of this research.  
43  
44  
45  
46  
47 262

48 263 **Data sharing**

49 264 Data will be available, on reasonable request, 18 months after publication of the manuscript. Data can  
50  
51 265 be requested by contacting the corresponding author, or by contacting [library-research-](mailto:library-research-support@shu.ac.uk)  
52  
53 266 [support@shu.ac.uk](mailto:library-research-support@shu.ac.uk).  
54  
55  
56  
57  
58 267  
59  
60

1  
2  
3  
4  
5  
6  
7  
8  
9  
10  
11  
12  
13  
14  
15  
16  
17  
18  
19  
20  
21  
22  
23  
24  
25  
26  
27  
28  
29  
30  
31  
32  
33  
34  
35  
36  
37  
38  
39  
40  
41  
42  
43  
44  
45  
46  
47  
48  
49  
50  
51  
52  
53  
54  
55  
56  
57  
58  
59  
60

244 **Ethics Statement**

245 Sheffield Hallam University Ethics Board reviewed and approved this study (ID: ER24303491).

246 Electronic consent to participate in the survey was obtained from all participants. All study processes  
247 conform to the relevant regulations and standards.

248

249

250

251

252

253

254

255

256

257

258

259

260

261

262

263

264

For peer review only

1  
2  
3 244 **Figure 1** – Data showing the use of technology to deliver exercise-based cardiac rehabilitation between  
4 January 2010 and June 2020. Black bars indicate how many programmes started using their chosen  
5 245 technology, on a given date. The grey area shows the cumulative number of cardiac rehabilitation  
6 246 programmes using technology.  
7  
8  
9 247  
10  
11 248  
12

13 249 **Figure 2** – Types of technology used to undertake baseline assessments. Orange bars indicate Phase I  
14 250 programmes, yellow bars indicate Phase II programmes, green lines indicate Phase III programmes, red bars  
15 251 indicate Phase IV programmes.  
16  
17  
18 252  
19  
20 253  
21

22 254 **Figure 3** – Types of technology used to deliver the exercise component of cardiac rehabilitation. Orange bars  
23 255 indicate Phase I programmes, yellow bars indicate Phase II programmes, green lines indicate Phase III  
24 256 programmes, red bars indicate Phase IV programmes.  
25  
26 257  
27  
28 258  
29  
30 259  
31 260  
32  
33 261  
34  
35 262  
36  
37 263  
38  
39 264  
40  
41 265  
42  
43 266  
44  
45 267  
46  
47 268  
48  
49 269  
50  
51 270  
52  
53 271  
54  
55 272  
56  
57 273 **References**  
58  
59  
60

- 1  
2  
3 244 1. Cowie, A., et al., *Standards and core components for cardiovascular disease prevention and*  
4 245 *rehabilitation*. Heart, 2019. **105**(7): p. 510-515.
- 5 246 2. Abell, B., P. Glasziou, and T. Hoffmann, *The Contribution of Individual Exercise Training*  
6 247 *Components to Clinical Outcomes in Randomised Controlled Trials of Cardiac Rehabilitation:*  
7 248 *A Systematic Review and Meta-regression*. Sports Med Open, 2017. **3**(1): p. 19.
- 8 249 3. Powell, R., et al., *Is exercise-based cardiac rehabilitation effective? A systematic review and*  
9 250 *meta-analysis to re-examine the evidence*. BMJ Open, 2018. **8**(3): p. e019656.
- 10 251 4. Dalal, H.M., et al., *The effects and costs of home-based rehabilitation for heart failure with*  
11 252 *reduced ejection fraction: The REACH-HF multicentre randomized controlled trial*. Eur J Prev  
12 253 *Cardiol*, 2019. **26**(3): p. 262-272.
- 13 254 5. Taylor, R.S., et al., *Exercise-Based Rehabilitation for Heart Failure: Cochrane Systematic*  
14 255 *Review, Meta-Analysis, and Trial Sequential Analysis*. JACC Heart Fail, 2019. **7**(8): p. 691-705.
- 15 256 6. Sumner, J., S.L. Grace, and P. Doherty, *Predictors of Cardiac Rehabilitation Utilization in*  
16 257 *England: Results From the National Audit*. J Am Heart Assoc, 2016. **5**(10).
- 17 258 7. Hinde, S., et al., *Improving cardiac rehabilitation uptake: Potential health gains by*  
18 259 *socioeconomic status*. Eur J Prev Cardiol, 2019. **26**(17): p. 1816-1823.
- 19 260 8. NHS England., *The NHS Long Term Plan*. 2019: [https://www.longtermplan.nhs.uk/wp-](https://www.longtermplan.nhs.uk/wp-content/uploads/2019/01/nhs-long-term-plan.pdf)  
20 261 [content/uploads/2019/01/nhs-long-term-plan.pdf](https://www.longtermplan.nhs.uk/wp-content/uploads/2019/01/nhs-long-term-plan.pdf) .
- 21 262 9. World Health Organisation. *Weekly operational update on COVID-19*. 2020 [cited 2020 7th  
22 263 September]; Available from: [https://www.who.int/docs/default-](https://www.who.int/docs/default-source/coronaviruse/situation-reports/wou-4-september-2020-approved.pdf?sfvrsn=91215c78_4)  
23 264 [source/coronaviruse/situation-reports/wou-4-september-2020-](https://www.who.int/docs/default-source/coronaviruse/situation-reports/wou-4-september-2020-approved.pdf?sfvrsn=91215c78_4)  
24 265 [approved.pdf?sfvrsn=91215c78\\_4](https://www.who.int/docs/default-source/coronaviruse/situation-reports/wou-4-september-2020-approved.pdf?sfvrsn=91215c78_4).
- 25 266 10. Le NK, L.A., Brooks JP, Khetpal S, Liauw D, Izurieta R, et al., *Impact of government-imposed*  
26 267 *social distancing measures on COVID-19 morbidity and mortality around the world*. 2020: Bull  
27 268 *World Health Organ*.
- 28 269 11. Moroni, F., et al., *Collateral Damage: Medical Care Avoidance Behavior Among Patients With*  
29 270 *Myocardial Infarction During the COVID-19 Pandemic*. JACC: Case Reports, 2020.
- 30 271 12. Garcia, S., et al., *Reduction in ST-Segment Elevation Cardiac Catheterization Laboratory*  
31 272 *Activations in the United States During COVID-19 Pandemic*. J Am Coll Cardiol, 2020. **75**(22):  
32 273 p. 2871-2872.
- 33 274 13. Anderson, L., et al., *Home-based versus centre-based cardiac rehabilitation*. Cochrane  
34 275 *Database Syst Rev*, 2017. **6**: p. CD007130.
- 35 276 14. Turk-Adawi, K., et al., *Cardiac Rehabilitation Availability and Density around the Globe*.  
36 277 *EClinicalMedicine*, 2019. **13**: p. 31-45.
- 37 278 15. British Heart Foundation. *The National Audit of Cardiac Rehabilitation: Quality and*  
38 279 *Outcomes Report 2019*. 2019.
- 39 280 16. Mann, D.M., et al., *COVID-19 transforms health care through telemedicine: Evidence from*  
40 281 *the field*. J Am Med Inform Assoc, 2020. **27**(7): p. 1132-1135.
- 41 282 17. Eysenbach, G., *Improving the quality of Web surveys: the Checklist for Reporting Results of*  
42 283 *Internet E-Surveys (CHERRIES)*. J Med Internet Res, 2004. **6**(3): p. e34.
- 43 284 18. World Health Organisation Archived: *WHO Timeline - COVID-19*. 2020.
- 44 285 19. McGregor, G., et al., *Does contemporary exercise-based cardiac rehabilitation improve*  
45 286 *quality of life for people with coronary artery disease? A systematic review and meta-*  
46 287 *analysis*. BMJ Open, 2020. **10**(6): p. e036089.
- 47 288 20. Babu, A.S., et al., *COVID-19: A Time for Alternate Models in Cardiac Rehabilitation to Take*  
48 289 *Centre Stage*. Can J Cardiol, 2020. **36**(6): p. 792-794.
- 49 290 21. Nichols, S., et al., *Current Insights into Exercise-based Cardiac Rehabilitation in Patients with*  
50 291 *Coronary Heart Disease and Chronic Heart Failure*. Int J Sports Med, 2020.

- 1  
2  
3 244 22. Strain, T., K. Wijndaele, and S. Brage, *Physical Activity Surveillance Through Smartphone*  
4 245 *Apps and Wearable Trackers: Examining the UK Potential for Nationally Representative*  
5 246 *Sampling*. JMIR Mhealth Uhealth, 2019. **7**(1): p. e11898.  
6  
7 247  
8  
9  
10  
11  
12  
13  
14  
15  
16  
17  
18  
19  
20  
21  
22  
23  
24  
25  
26  
27  
28  
29  
30  
31  
32  
33  
34  
35  
36  
37  
38  
39  
40  
41  
42  
43  
44  
45  
46  
47  
48  
49  
50  
51  
52  
53  
54  
55  
56  
57  
58  
59  
60

For peer review only



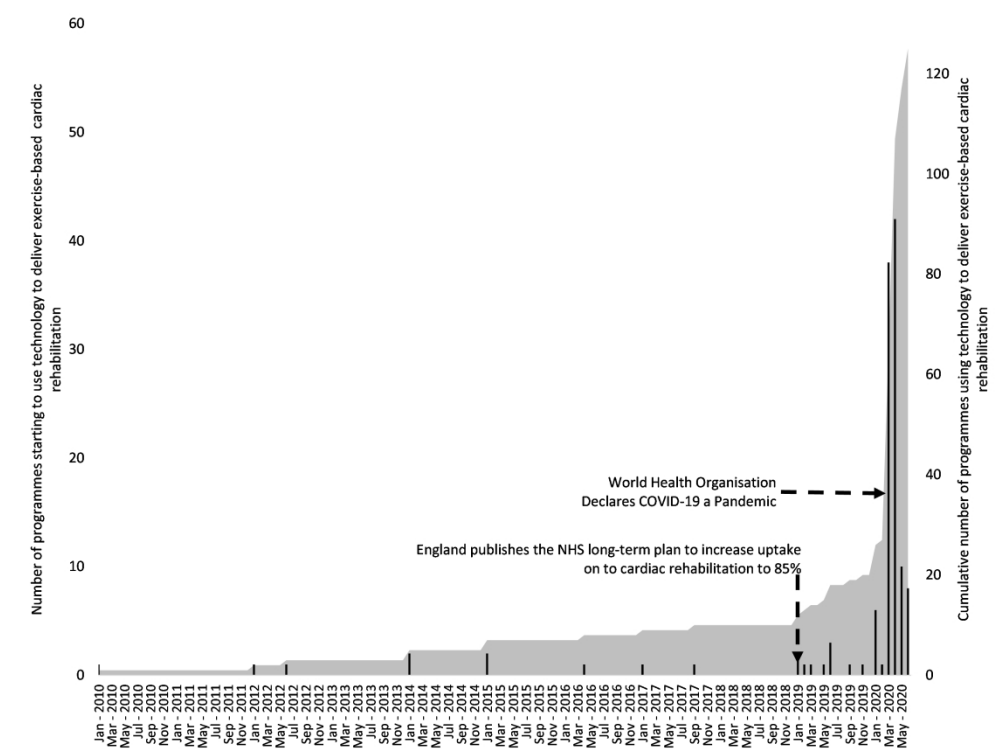

Figure 1 – Data showing the use of technology to deliver exercise-based cardiac rehabilitation between January 2010 and June 2020. Black bars indicate how many programmes started using their chosen technology, on a given date. The grey area shows the cumulative number of cardiac rehabilitation programmes using technology.

250x188mm (300 x 300 DPI)

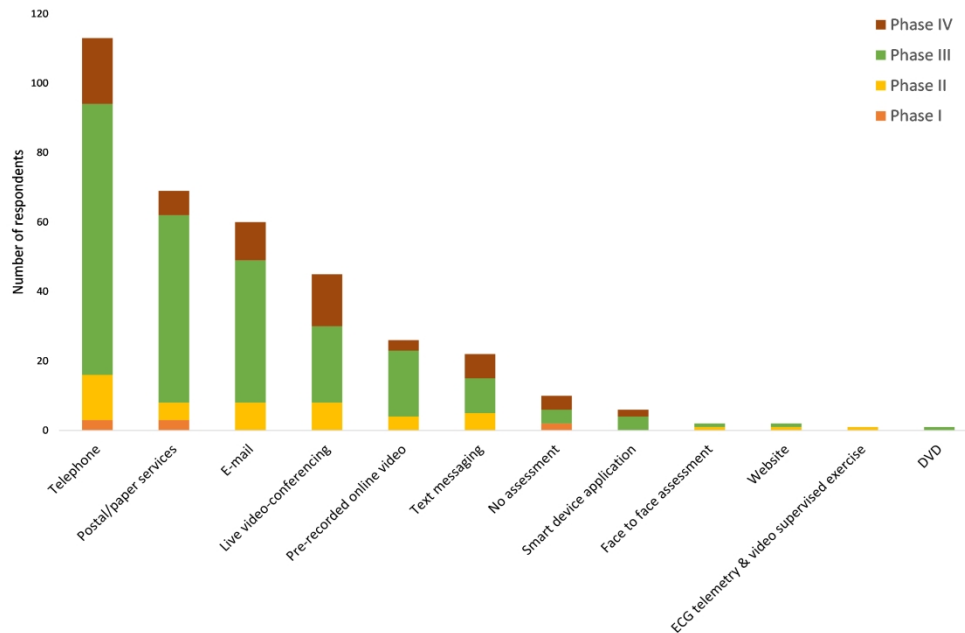

Figure 2 – Types of technology used to undertake baseline assessments. Orange bars indicate Phase I programmes, yellow bars indicate Phase II programmes, green lines indicate Phase III programmes, red bars indicate Phase IV programmes.

272x175mm (300 x 300 DPI)

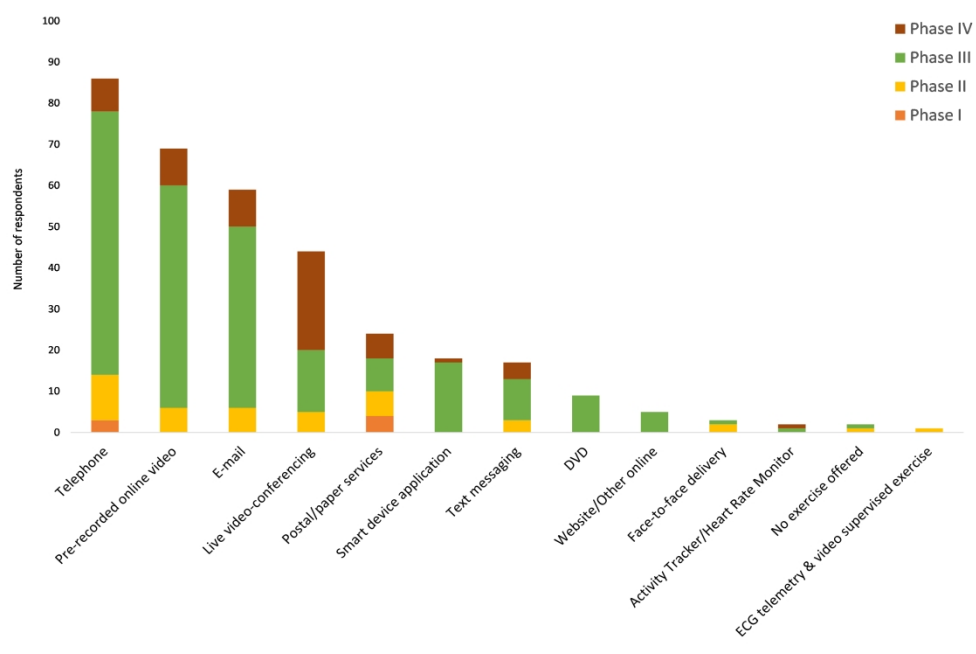

Figure 3 – Types of technology used to deliver the exercise component of cardiac rehabilitation. Orange bars indicate Phase I programmes, yellow bars indicate Phase II programmes, green lines indicate Phase III programmes, red bars indicate Phase IV programmes.

270x176mm (300 x 300 DPI)

**Appendix 1 - Checklist for Reporting Results of Internet E-Surveys (CHERRIES)**

| <b>Checklist Item</b>            | <b>Explanation</b>                                                                                                                                                                                                                                                                                                                                                                                                    | <b>Page Number</b>  |
|----------------------------------|-----------------------------------------------------------------------------------------------------------------------------------------------------------------------------------------------------------------------------------------------------------------------------------------------------------------------------------------------------------------------------------------------------------------------|---------------------|
| Describe survey design           | Describe target population, sample frame. Is the sample a convenience sample? (In "open" surveys this is most likely.)                                                                                                                                                                                                                                                                                                | 7                   |
| IRB approval                     | Mention whether the study has been approved by an IRB.                                                                                                                                                                                                                                                                                                                                                                | 8                   |
| Informed consent                 | Describe the informed consent process. Where were the participants told the length of time of the survey, which data were stored and where and for how long, who the investigator was, and the purpose of the study?                                                                                                                                                                                                  | Page 8 & Appendix 2 |
| Data protection                  | If any personal information was collected or stored, describe what mechanisms were used to protect unauthorized access.                                                                                                                                                                                                                                                                                               | 7                   |
| Development and testing          | State how the survey was developed, including whether the usability and technical functionality of the electronic questionnaire had been tested before fielding the questionnaire.                                                                                                                                                                                                                                    | 7 & 8               |
| Open survey versus closed survey | An "open survey" is a survey open for each visitor of a site, while a closed survey is only open to a sample which the investigator knows (password-protected survey).                                                                                                                                                                                                                                                | 7                   |
| Contact mode                     | Indicate whether or not the initial contact with the potential participants was made on the Internet. (Investigators may also send out questionnaires by mail and allow for Web-based data entry.)                                                                                                                                                                                                                    | 8                   |
| Advertising the survey           | How/where was the survey announced or advertised? Some examples are offline media (newspapers), or online (mailing lists – If yes, which ones?) or banner ads (Where were these banner ads posted and what did they look like?). It is important to know the wording of the announcement as it will heavily influence who chooses to participate. Ideally the survey announcement should be published as an appendix. | 8 & Appendix 3      |
| Web/E-mail                       | State the type of e-survey (eg, one posted on a Web site, or one sent out through e-mail). If it is an e-mail survey, were the responses entered manually into a database, or was there an automatic method for capturing responses?                                                                                                                                                                                  | 8                   |
| Context                          | Describe the Web site (for mailing list/newsgroup) in which the survey was posted. What is the Web site about, who is visiting it, what are visitors normally looking for? Discuss to what degree the content of the Web site could pre-select the sample or influence the results. For example, a                                                                                                                    | 8                   |

|                                                                  |                                                                                                                                                                                                                                                                                                                                                                                                                                                                                               |                   |
|------------------------------------------------------------------|-----------------------------------------------------------------------------------------------------------------------------------------------------------------------------------------------------------------------------------------------------------------------------------------------------------------------------------------------------------------------------------------------------------------------------------------------------------------------------------------------|-------------------|
|                                                                  | survey about vaccination on a anti-immunization Web site will have different results from a Web survey conducted on a government Web site                                                                                                                                                                                                                                                                                                                                                     |                   |
| Mandatory/voluntary                                              | Was it a mandatory survey to be filled in by every visitor who wanted to enter the Web site, or was it a voluntary survey?                                                                                                                                                                                                                                                                                                                                                                    | 7                 |
| Incentives                                                       | Were any incentives offered (eg, monetary, prizes, or non-monetary incentives such as an offer to provide the survey results)?                                                                                                                                                                                                                                                                                                                                                                | 8                 |
| Time/Date                                                        | In what timeframe were the data collected?                                                                                                                                                                                                                                                                                                                                                                                                                                                    | 8                 |
| Randomization of items or questionnaires                         | To prevent biases items can be randomized or alternated.                                                                                                                                                                                                                                                                                                                                                                                                                                      | N/A               |
| Adaptive questioning                                             | Use adaptive questioning (certain items, or only conditionally displayed based on responses to other items) to reduce number and complexity of the questions.                                                                                                                                                                                                                                                                                                                                 | N/A               |
| Number of Items                                                  | What was the number of questionnaire items per page? The number of items is an important factor for the completion rate.                                                                                                                                                                                                                                                                                                                                                                      | 7, 8 & Appendix 2 |
| Number of screens (pages)                                        | Over how many pages was the questionnaire distributed? The number of items is an important factor for the completion rate.                                                                                                                                                                                                                                                                                                                                                                    | 8                 |
| Completeness check                                               | It is technically possible to do consistency or completeness checks before the questionnaire is submitted. Was this done, and if "yes", how (usually JavaScript)? An alternative is to check for completeness after the questionnaire has been submitted (and highlight mandatory items). If this has been done, it should be reported. All items should provide a non-response option such as "not applicable" or "rather not say", and selection of one response option should be enforced. | 8                 |
| Review step                                                      | State whether respondents were able to review and change their answers (eg, through a Back button or a Review step which displays a summary of the responses and asks the respondents if they are correct).                                                                                                                                                                                                                                                                                   | 8                 |
| Unique site visitor                                              | If you provide view rates or participation rates, you need to define how you determined a unique visitor. There are different techniques available, based on IP addresses or cookies or both.                                                                                                                                                                                                                                                                                                 | 8                 |
| View rate (Ratio of unique survey visitors/unique site visitors) | Requires counting unique visitors to the first page of the survey, divided by the number of unique site visitors (not page views!). It is not unusual to have view rates of less than 0.1 % if the survey is voluntary.                                                                                                                                                                                                                                                                       | N/A               |

|                                                                                                              |                                                                                                                                                                                                                                                                                                                                                                                                                                                                                                                                                                            |                                                                                           |
|--------------------------------------------------------------------------------------------------------------|----------------------------------------------------------------------------------------------------------------------------------------------------------------------------------------------------------------------------------------------------------------------------------------------------------------------------------------------------------------------------------------------------------------------------------------------------------------------------------------------------------------------------------------------------------------------------|-------------------------------------------------------------------------------------------|
| Participation rate<br>(Ratio of unique visitors who agreed to participate/unique first survey page visitors) | Count the unique number of people who filled in the first survey page (or agreed to participate, for example by checking a checkbox), divided by visitors who visit the first page of the survey (or the informed consents page, if present). This can also be called “recruitment” rate.                                                                                                                                                                                                                                                                                  | 9                                                                                         |
| Completion rate<br>(Ratio of users who finished the survey/users who agreed to participate)                  | The number of people submitting the last questionnaire page, divided by the number of people who agreed to participate (or submitted the first survey page). This is only relevant if there is a separate “informed consent” page or if the survey goes over several pages. This is a measure for attrition. Note that “completion” can involve leaving questionnaire items blank. This is not a measure for how completely questionnaires were filled in. (If you need a measure for this, use the word “completeness rate”.)                                             | N/A – Because if programmes were cancelled they weren’t able to progress to the end page. |
| Cookies used                                                                                                 | Indicate whether cookies were used to assign a unique user identifier to each client computer. If so, mention the page on which the cookie was set and read, and how long the cookie was valid. Were duplicate entries avoided by preventing users access to the survey twice; or were duplicate database entries having the same user ID eliminated before analysis? In the latter case, which entries were kept for analysis (eg, the first entry or the most recent)?                                                                                                   | N/A                                                                                       |
| IP check                                                                                                     | Indicate whether the IP address of the client computer was used to identify potential duplicate entries from the same user. If so, mention the period of time for which no two entries from the same IP address were allowed (eg, 24 hours). Were duplicate entries avoided by preventing users with the same IP address access to the survey twice; or were duplicate database entries having the same IP address within a given period of time eliminated before analysis? If the latter, which entries were kept for analysis (eg, the first entry or the most recent)? | 8                                                                                         |
| Log file analysis                                                                                            | Indicate whether other techniques to analyze the log file for identification of multiple entries were used. If so, please describe.                                                                                                                                                                                                                                                                                                                                                                                                                                        | N/A                                                                                       |
| Registration                                                                                                 | In “closed” (non-open) surveys, users need to login first and it is easier to prevent duplicate entries from the same user. Describe how this was done. For example, was the survey never displayed a second time once the user had filled it in, or was the username stored together with the survey results and later eliminated? If the latter, which entries were kept for analysis (eg, the first entry or the most recent)?                                                                                                                                          | N/A                                                                                       |

|                                                     |                                                                                                                                                                                                                                               |                   |
|-----------------------------------------------------|-----------------------------------------------------------------------------------------------------------------------------------------------------------------------------------------------------------------------------------------------|-------------------|
| Handling of incomplete questionnaires               | Were only completed questionnaires analyzed? Were questionnaires which terminated early (where, for example, users did not go through all questionnaire pages) also analyzed?                                                                 | 9,10 & Appendix 4 |
| Questionnaires submitted with an atypical timestamp | Some investigators may measure the time people needed to fill in a questionnaire and exclude questionnaires that were submitted too soon. Specify the timeframe that was used as a cut-off point, and describe how this point was determined. | 8                 |
| Statistical correction                              | Indicate whether any methods such as weighting of items or propensity scores have been used to adjust for the non-representative sample; if so, please describe the methods.                                                                  | N/A               |

This checklist has been modified from Eysenbach G. Improving the quality of Web surveys: the Checklist for Reporting Results of Internet E-Surveys (CHERRIES). J Med Internet Res. 2004 Sep 29;6(3):e34 [erratum in J Med Internet Res. 2012; 14(1): e8.]. Article available at <https://www.jmir.org/2004/3/e34/>; erratum available <https://www.jmir.org/2012/1/e8/>. Copyright ©Gunther Eysenbach. Originally published in the [Journal of Medical Internet Research](https://www.jmir.org/2004/3/e34/), 29.9.2004 and 04.01.2012.

This is an open-access article distributed under the terms of the Creative Commons Attribution License (<https://creativecommons.org/licenses/by/2.0/>), which permits unrestricted use, distribution, and reproduction in any medium, provided the original work, first published in the Journal of Medical Internet Research, is properly cited.

## Appendix 2 - Electronic survey

# Using technology to deliver the exercise component of cardiac rehabilitation

---

### Start of Block: Default Question Block

Background Information Cardiac Rehabilitation is a vital treatment for patients recovering from a cardiac event. Exercise is a core component of a comprehensive cardiac rehabilitation programme, however, the outbreak of Covid-19 has meant that patients in many countries can no longer attend assessments and exercise classes in person. As a consequence, healthcare services have had to adopt new ways of working to ensure that their patients continue to receive cardiac rehabilitation services. Anecdotal evidence suggests that some cardiac rehabilitation services have begun using technology to deliver their assessments, physical activity advice, and/or exercise programmes remotely. The Covid-19 outbreak may therefore represent a step-change in services capacity to use the technology when the disease is brought under control. This may provide an opportunity to increase participation in cardiac rehabilitation among those who are unable or unwilling to travel to centre-based cardiac rehabilitation. This brief survey is designed to help the British Association for Cardiovascular Prevention and Rehabilitation understand if, or how, technology is being used to deliver the exercise component of cardiac rehabilitation. It will also capture professional experiences of using technology to deliver exercise-based cardiac rehabilitation and obtain an estimate of the patient demographic that are engaging with alternative delivery methods of cardiac rehabilitation.

---

Page Break



1  
2  
3  
4  
5 Thank you for taking the time to complete our brief survey. It should take approximately 10 minutes  
6 to complete. We have asked you to complete this survey because you are involved in the delivery of  
7 exercise-based cardiac rehabilitation and we want to understand how your practice has changed in  
8 relation to the COVID-19 outbreak. By proceeding to the next page of the survey you are providing  
9 consent to take part in the study. Only information that is essential to answer our research question  
10 will be collected. Any information collected will be helpful, and will be processed in accordance with  
11 the General Data Protection Regulation (2018). If you would like to withdraw from the study, just  
12 exit the web page. We will keep the responses you have provide even if you don't complete the  
13 whole survey. If you would like any information about data protection or the study, please contact:  
14 Dr Simon Nichols Advanced Wellbeing Research Centre Collegiate Hall Collegiate Crescent  
15 Sheffield Hallam University S10 2BP s.j.nichols@shu.ac.uk  
16  
17  
18

19  
20  Next page (1)  
21  
22

23  
24  
25 Page Break  
26  
27  
28  
29  
30  
31  
32  
33  
34  
35  
36  
37  
38  
39  
40  
41  
42  
43  
44  
45  
46  
47  
48  
49  
50  
51  
52  
53  
54  
55  
56  
57  
58  
59  
60

1  
2  
3  
4  
5 Screening Q Have you previously completed this questionnaire?  
6  
7

8  Yes (1)  
9

10  No (2)  
11  
12  
13

14 Q1 Which phase of cardiac rehabilitation do you work in: (please tick the phase which you spend  
15 most of your time)  
16

17  Phase I (1)  
18

19  Phase II (2)  
20

21  Phase III (3)  
22

23  Phase IV (4)  
24  
25  
26  
27  
28  
29  
30

31  
32  
33 Q2 Which country do you work in?  
34

35  England (1)  
36

37  Northern Ireland (2)  
38

39  Scotland (3)  
40

41  Wales (4)  
42

43  Non-UK (please state) (5) \_\_\_\_\_  
44  
45  
46  
47  
48  
49  
50

51  
52  
53 Page Break \_\_\_\_\_  
54  
55  
56  
57  
58  
59  
60

1  
2  
3  
4  
5 Q3 Have you continued to provide exercise-based cardiac rehabilitation services during the COVID-  
6 19 outbreak?  
7  
8

- 9  Yes – We are able to see as many patients as we did before the COVID-19 outbreak (1)  
10  
11  Yes – But we aren't able to see as many patients as we did before the COVID-19 outbreak  
12 (2)  
13  
14  No – All services have been cancelled/there are no staff to run our programmes (3)  
15  
16  
17  
18  
19
- 

20  
21  
22 Q4 Since the COVID-19 outbreak, has your service found that:  
23  
24

- 25  The same number of patients are accessing exercise-based cardiac rehabilitation (1)  
26  
27  Fewer patients are accessing exercise-based cardiac rehabilitation (2)  
28  
29  No patients are accessing exercise-based cardiac rehabilitation (3)  
30  
31  
32  
33  
34
- 

35  
36 Page Break

---

1  
2  
3  
4  
5 Q5 Are the patients you are currently treating representative of the patients you would treat under  
6 normal circumstances, with respect to ethnicity?  
7

8  No - my patient population is less diverse (1)  
9

10  
11  Yes - my patient population is as diverse as normal (2)  
12

13  
14  No - my patient population is more diverse (3)  
15  
16  
17

18  
19  
20  
21  
22 Q6 Only answer this question if you are a UK centre. Approximately what percentage of the patients  
23 you saw in the last 7 days were White British?  
24

25 0 10 20 30 40 50 60 70 80 90 100

26  
27  
28 % of patients who were White British ( )  
29

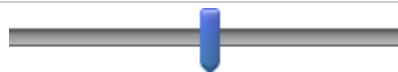

34  
35 Page Break  
36  
37  
38  
39  
40  
41  
42  
43  
44  
45  
46  
47  
48  
49  
50  
51  
52  
53  
54  
55  
56  
57  
58  
59  
60

1  
2  
3  
4  
5 Q7 Are the patients you are currently treating representative of the patients you would treat under  
6 normal circumstances, with respect to age?  
7

- 8  
9  No - my patient population is younger (1)  
10  
11  Yes - the age group of my patients is similar to normal (2)  
12  
13  
14  No - my patient population is older (3)  
15  
16  
17

18  
19  
20  
21 Q8 Approximately what percentage of the patients you saw in the last 7 days were over 65 years  
22 old?  
23

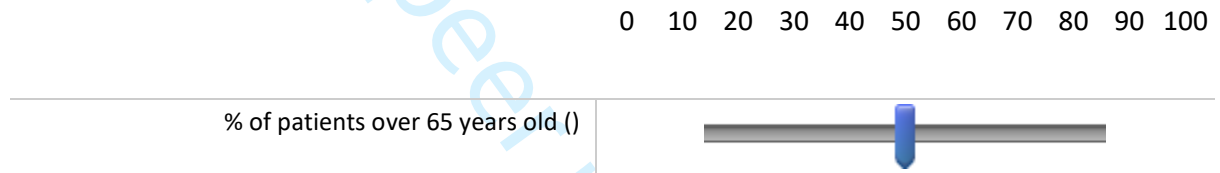

34  
35 Page Break  
36  
37  
38  
39  
40  
41  
42  
43  
44  
45  
46  
47  
48  
49  
50  
51  
52  
53  
54  
55  
56  
57  
58  
59  
60

1  
2  
3  
4  
5 Q9 Are the patients you are currently treating representative of the patients you would treat under  
6 normal circumstances, with respect to female participation?  
7

- 8  
9  No - the proportion of female participants is smaller (1)  
10  
11  Yes - the proportion of female participants is the same (2)  
12  
13  
14  No -the proportion of female participants is larger (3)  
15  
16  
17

18 -----  
19  
20  
21 Q10 Are the patients you are currently treating representative of the patients you would treat under  
22 normal circumstances, with respect to male participation?  
23

- 24  
25  No - the proportion of male participants is smaller (1)  
26  
27  
28  Yes - the proportion of male participants is the same (2)  
29  
30  
31  No - the proportion of male participants is larger (3)  
32  
33  
34

35 -----  
36  
37  
38 Q11 Approximately what percentage of the patients you saw in the last 7 days were female?

39 0 10 20 30 40 50 60 70 80 90 100

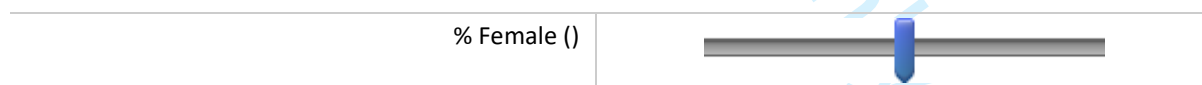

49  
50 Page Break -----  
51  
52  
53  
54  
55  
56  
57  
58  
59  
60

1  
2  
3  
4  
5 Q12 Are you using any of the following technology to deliver a cardiac rehabilitation exercise  
6 assessment? (tick all that apply)  
7

8  Paper/postal services (1)  
9

10  
11  Telephone (2)  
12

13  
14  Text messaging (3)  
15

16  
17  E-mail (4)  
18

19  
20  Recorded video e.g. YouTube (5)  
21

22  
23  Live video conferencing e.g. Zoom, Skype, Microsoft Teams, Facebook (6)  
24

25  
26  Other (please state) (7) \_\_\_\_\_  
27  
28

29  
30 -----  
31  
32  
33 Q13 How are you assessing functional capacity during your assessment? (tick all that apply)  
34

35  I am not assessing functional capacity (1)  
36

37  Self-reported fitness (2)  
38

39  Duke Activity Status Index/Other questionnaire (3)  
40

41  Step count from patients own physical activity tracker (4)  
42

43  Remotely supervised exercise test (please state which test) (5)  
44  
45 \_\_\_\_\_  
46

47  
48  Other (please state) (6) \_\_\_\_\_  
49  
50  
51  
52  
53  
54  
55  
56 -----  
57  
58  
59  
60

1  
2  
3 Q14 Are you using any of the following technology to deliver the physical activity/exercise  
4 component of cardiac rehabilitation? (tick all that apply)  
5

6  Paper/postal services (1)  
7

8  Telephone (2)  
9

10  Text messaging (3)  
11

12  E-mail (4)  
13

14  Recorded video e.g. YouTube (5)  
15

16  Live video conferencing e.g. Zoom, Skype, Microsoft Teams, Facebook (6)  
17

18  Other (please state) (7) \_\_\_\_\_  
19  
20  
21  
22  
23  
24

25  
26  
27  
28  
29  
30 Page Break \_\_\_\_\_  
31  
32  
33  
34  
35  
36  
37  
38  
39  
40  
41  
42  
43  
44  
45  
46  
47  
48  
49  
50  
51  
52  
53  
54  
55  
56  
57  
58  
59  
60



1  
2  
3  
4  
5 Q15 Did you use this technology before the COVID-19 restrictions?  
6  
7

8  Yes (1)  
9

10  No (2)  
11  
12  
13

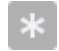

17  
18  
19 Q16 On approximately what date did you start using this technology?  
20  
21

22 \_\_\_\_\_  
23  
24 -----  
25

26  
27 Q17 If you used remote technology before the COVID-19 restrictions, have you found that:  
28  
29

30  The same number of patients are accessing exercise-based cardiac rehabilitation using  
31 technology (1)  
32

33  Fewer patients are accessing exercise-based cardiac rehabilitation using technology (2)  
34  
35

36  No patients are accessing exercise-based cardiac rehabilitation using technology (3)  
37  
38  
39

40 -----  
41 Page Break \_\_\_\_\_  
42  
43  
44  
45  
46  
47  
48  
49  
50  
51  
52  
53  
54  
55  
56  
57  
58  
59  
60

1  
2  
3  
4  
5 Q18 Are you able to use technology to deliver exercise-based cardiac rehabilitation to: (tick all that  
6 apply)  
7

8  Low risk patients (1)  
9

10  
11  Moderate risk patients (2)  
12

13  
14  High risk patients (3)  
15  
16  
17

18  
19  
20  
21  
22 Q19 I am able to offer physical activity recommendations to patients that have not had an  
23 assessment in person? (i.e. in the same room as the assessor)  
24

25  Yes (1)  
26

27  
28  No (2)  
29  
30  
31

32  
33  
34  
35 Q20 I am able to offer an exercise prescription to patients that have not had an assessment in  
36 person? (i.e. in the same room as the assessor)  
37

38  
39  Yes (1)  
40

41  
42  No (2)  
43  
44  
45

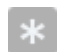

48  
49  
50  
51 Q21 Can you briefly describe what kind of physical activity recommendations you are making and/or  
52 exercises you are prescribing?  
53

54 Examples may include chair-based exercise, resistance bands, walking, running on the spot and body  
55 weight exercises.  
56

57  
58 \_\_\_\_\_  
59 \_\_\_\_\_  
60

1  
2  
3  
4  
5  
6  
7  
8  
9  
10  
11  
12  
13  
14  
15  
16  
17  
18  
19  
20  
21  
22  
23  
24  
25  
26  
27  
28  
29  
30  
31  
32  
33  
34  
35  
36  
37  
38  
39  
40  
41  
42  
43  
44  
45  
46  
47  
48  
49  
50  
51  
52  
53  
54  
55  
56  
57  
58  
59  
60

---

---

---

-----  
Page Break

---

For peer review only

1  
2  
3  
4  
5 Q22 How many supervised physical activity/exercise training sessions can a patient attend, each  
6 week?  
7  
8

9 \_\_\_\_\_  
10  
11 -----  
12  
13

14 Q23 Are the physical activity/exercise sessions you are supervising: (tick all that apply)  
15

16  Group exercise (1)  
17  
18

19  One-on-one (2)  
20  
21  
22  
23  
24 -----  
25

26 \*

27  
28 Q24 How long is each supervised physical activity/exercise session? Please provide your answer in  
29 minutes.  
30  
31

32 \_\_\_\_\_  
33  
34 -----  
35

36 Page Break \_\_\_\_\_  
37  
38  
39  
40  
41  
42  
43  
44  
45  
46  
47  
48  
49  
50  
51  
52  
53  
54  
55  
56  
57  
58  
59  
60

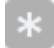

Q25 How many unsupervised physical activity/exercise training sessions are you prescribing for a patient, each week?

---



Q26 How long is each unsupervised physical activity/exercise session? Please provide your answer in minutes.

---

Page Break

For peer review only

1  
2  
3  
4  
5 Q27 What intensity range do you recommend/prescribe? (tick all that apply)  
6  
7  
8  
9  
10

11  Low (e.g. RPE 11) (1)  
12

13  Moderate (e.g. RPE 13) (2)  
14

15  High (e.g. RPE 15) (3)  
16  
17  
18  
19  
20

---

21  
22  
23  
24 Q28 Is this intensity: (Tick one option only)  
25

26  Lower than normal (1)  
27

28  The same as normal (2)  
29

30  Higher than normal (3)  
31  
32  
33  
34  
35

---

36  
37 Page Break  
38  
39  
40  
41  
42  
43  
44  
45  
46  
47  
48  
49  
50  
51  
52  
53  
54  
55  
56  
57  
58  
59  
60

1  
2  
3  
4  
5 29 Do you think that the programmes you are providing are: (Tick one option only)  
6  
7

8  More effective than normal (1)  
9

10  As effective as normal (2)  
11  
12

13  Less effective than normal (3)  
14  
15  
16

17 -----  
18 Page Break 

---

For peer review only

1  
2  
3  
4  
5 Q30 What barriers have you encountered when using technology to deliver cardiac rehabilitation?  
6 (tick all that apply)  
7

- 8  No barriers (1)  
9  
10  
11  Patients have no internet connection (2)  
12  
13  
14  Patients do not have access to computers/tablets/smart phone (3)  
15  
16  
17  Patients are not confident in using technology (4)  
18  
19  
20  Patients are concerned about personal safety (5)  
21  
22  
23  Patient lack of interest in receiving services using technology (6)  
24  
25  
26  My Trust/Health Board /employer do not support the delivery of health services using  
27 technology (7)  
28  
29  
30  Internet security and patient confidentiality concerns (8)  
31  
32  
33  Professionals are not confident in delivering services using technology (9)  
34  
35  
36  Professionals are concerned about patient safety (10)  
37  
38  
39  Other (please specify) (11) \_\_\_\_\_  
40  
41  
42

43  
44  
45 Page Break \_\_\_\_\_  
46  
47  
48  
49  
50  
51  
52  
53  
54  
55  
56  
57  
58  
59  
60



1  
2  
3  
4  
5 Q31 How many adverse events resulting in minor injury have been reported since you have started  
6 delivering cardiac rehabilitation remotely? Please only report incidents that are related to  
7 exercise-based cardiac rehabilitation.  
8  
9

10 \_\_\_\_\_

11  
12 -----

13  
14 Page Break \_\_\_\_\_

15  
16  
17  
18  
19  
20  
21  
22  
23  
24  
25  
26  
27  
28  
29  
30  
31  
32  
33  
34  
35  
36  
37  
38  
39  
40  
41  
42  
43  
44  
45  
46  
47  
48  
49  
50  
51  
52  
53  
54  
55  
56  
57  
58  
59  
60

For peer review only

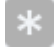

Q32 How many adverse events resulting in life changing injury have been reported since you have started delivering cardiac rehabilitation remotely? Please only report incidents that are related to exercise-based cardiac rehabilitation.

---

Page Break

---

For peer review only

1  
2  
3  
4  
5  
6  
7  
8  
9  
10  
11  
12  
13  
14  
15  
16  
17  
18  
19  
20  
21  
22  
23  
24  
25  
26  
27  
28  
29  
30  
31  
32  
33  
34  
35  
36  
37  
38  
39  
40  
41  
42  
43  
44  
45  
46  
47  
48  
49  
50  
51  
52  
53  
54  
55  
56  
57  
58  
59  
60

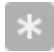

Q33 How many adverse events resulting in death have been reported since you have started delivering cardiac rehabilitation remotely? Please only report incidents that are related to exercise-based cardiac rehabilitation.

---

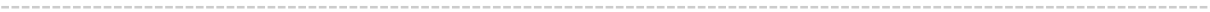

Page Break 

---

For peer review only

1  
2  
3  
4  
5 Q34 Do you think that the way you are using technology now should be an option for patients in  
6 your future standard practice?  
7

8  
9  Yes (1)

10  
11  
12  No (2)  
13  
14

15 -----  
16  
17 Page Break

18  
19  
20  
21  
22  
23  
24  
25  
26  
27  
28  
29  
30  
31  
32  
33  
34  
35  
36  
37  
38  
39  
40  
41  
42  
43  
44  
45  
46  
47  
48  
49  
50  
51  
52  
53  
54  
55  
56  
57  
58  
59  
60

For peer review only

1  
2  
3  
4  
5  
6  
7  
8  
9  
10  
11  
12  
13  
14  
15  
16  
17  
18  
19  
20  
21  
22  
23  
24  
25  
26  
27  
28  
29  
30  
31  
32  
33  
34  
35  
36  
37  
38  
39  
40  
41  
42  
43  
44  
45  
46  
47  
48  
49  
50  
51  
52  
53  
54  
55  
56  
57  
58  
59  
60



Q35 Is there anything else you would like to tell us about your experience or approaches to delivering exercise-based cardiac rehabilitation using remote technology? (500 characters max)

---

---

---

---

---

End of Block: Default Question Block

---

For peer review only

### Appendix 3 - Recruitment material

Appendix 3a - E-mail to BACPR members on 2<sup>nd</sup> and 25<sup>th</sup> of June 2020

BACPR Survey - Use of remote technology to deliver the exercise component of cardiac rehabilitation.

Dear Member,

The outbreak of Covid-19 has meant that patients in many countries can no longer attend assessments and exercise classes in person. As a consequence, many healthcare services have had to adopt new ways of working to ensure that their patients continue to receive cardiac rehabilitation services. Anecdotal evidence suggests that some cardiac rehabilitation services have begun to use technology to deliver their assessments, physical activity advice, and/or exercise programmes, remotely. The Covid-19 outbreak may therefore represent a step-change in services capacity to use the technology when the disease is brought under control. This may provide an opportunity to increase participation in cardiac rehabilitation among those who are unable or unwilling to travel to centre-based cardiac rehabilitation, in the long-term.

To help improve the provision of cardiac rehabilitation in the future, we would be extremely grateful if you could take 10 minutes to complete a brief survey which will help the British Association for Cardiovascular Prevention and Rehabilitation understand if, or how, technology is being used to deliver the exercise component of cardiac rehabilitation. It will also capture your professional experiences of using technology to deliver exercise-based cardiac rehabilitation and obtain an estimate of the patient demographic that are engaging with alternative delivery methods of cardiac rehabilitation. The findings of the study will be disseminated through the BACPR as well as conferences, scientific publications, and if appropriate, training courses.

The survey can be completed on a desktop computer or a smart phone, and will take approximately 10 minutes. To proceed to the survey, [click here](#).

Thank you for taking the time to consider taking part in this study.

Best wishes

Dr Simon Nichols

1  
2  
3 Simon Nichols  
4  
5

6  
7 BACPR Scientific Chair  
8

9 British Association for Cardiovascular Prevention & Rehabilitation  
10

11 c/o BCS, 9 Fitzroy Square,  
12

13 London  
14

15 W1T 5HW  
16

17 www.bacpr.com  
18  
19  
20  
21

22 **Appendix 3b - Example Twitter advert posted on Twitter by the study authors on June 3<sup>rd</sup> 2020**  
23  
24

25  
26 RT #COVID19 is an unprecedented challenge to #cardiacrehab Please tell us if/how you are using  
27 technology to deliver the exercise component of CR by completing this 10 minute survey Down  
28 pointing backhand index

29 [https://shusls.eu.qualtrics.com/jfe/form/SV\\_eEgCIDLGhsAE7Fr?Q\\_CHL=social&Q\\_SocialSource=twitter](https://shusls.eu.qualtrics.com/jfe/form/SV_eEgCIDLGhsAE7Fr?Q_CHL=social&Q_SocialSource=twitter)  
30 er @bacpr @A\_ODoherty @susandawkes @aynsleycowie @drtom\_butler @SHU\_PAWPH  
31  
32  
33  
34  
35

36 Example advert posted by the BACPR Exercise Instructor Network on their Facebook page, on 8<sup>th</sup>  
37 June 2020  
38  
39  
40

41 **Appendix 3c - Calling all BACPR Members please check your email inboxes!!**  
42

43 We would greatly appreciate your help in completing our survey regarding the use of remote  
44 technology to deliver the exercise component of Cardiac Rehab. The findings of this study will be  
45 disseminated through the BACPR, conferences & scientific publications.  
46  
47  
48  
49  
50  
51  
52  
53  
54  
55  
56  
57  
58  
59  
60

| Question                                                                                                                                                                                                                                                                                    | Results reported in Manuscript | Phase I Responses | Phase II Responses | Phase III Responses | Phase IV Responses | Total Responses |
|---------------------------------------------------------------------------------------------------------------------------------------------------------------------------------------------------------------------------------------------------------------------------------------------|--------------------------------|-------------------|--------------------|---------------------|--------------------|-----------------|
| Q1 Which phase of cardiac rehabilitation do you work in: (please tick the phase which you spend most of your time)                                                                                                                                                                          | Yes – Page 7                   | 14                | 29                 | 164                 | 123                | 330             |
| Q2) Which country do you work in?                                                                                                                                                                                                                                                           | Yes – Page 7                   | 14                | 29                 | 164                 | 123                | 330             |
| Q3) Have you continued to provide exercise-based cardiac rehabilitation services during the COVID-19 outbreak?                                                                                                                                                                              | Yes – Page 8 & Table 1         | 14                | 29                 | 164                 | 123                | 330             |
| <b>The following questions are applicable to a maximum of 167 respondents due to 163 programmes stating that their service had been suspended</b>                                                                                                                                           |                                |                   |                    |                     |                    |                 |
| Q4 Since the COVID-19 outbreak, has your service found that:<br>-The same number of patients are accessing exercise-based cardiac rehabilitation<br>-Fewer patients are accessing exercise-based cardiac rehabilitation<br>-No patients are accessing exercise-based cardiac rehabilitation | Yes – Page 8 & Table 1         | 8                 | 17                 | 102                 | 34                 | 161             |
| Q5 Are the patients you are currently treating representative of the patients you would treat under normal circumstances, with respect to ethnicity?                                                                                                                                        | Yes – Page 8 & Table 1         | 7                 | 16                 | 95                  | 33                 | 151             |
| Q6 <u>Only answer this question if you are a UK centre.</u> Approximately what percentage of the patients you saw in the last 7 days were White British?                                                                                                                                    | Yes – Page 8 & Table 1         | 5                 | 5                  | 83                  | 30                 | 123             |
| Q7 Are the patients you are currently treating representative of the patients you would treat under normal circumstances, with respect to age?                                                                                                                                              | Yes – Page 8 & Table 1         | 7                 | 15                 | 92                  | 32                 | 146             |
| Q8 Approximately what percentage of the patients you saw in the last 7 days were over 65 years old?                                                                                                                                                                                         | Yes – Page 8 & Table 1         | 7                 | 13                 | 88                  | 31                 | 139             |
| Q9 Are the patients you are currently treating representative of the                                                                                                                                                                                                                        | Yes – Page 8 & Table 1         | 6                 | 15                 | 85                  | 29                 | 135             |



|    |                                                                                                                                                                |                          |   |    |    |    |
|----|----------------------------------------------------------------------------------------------------------------------------------------------------------------|--------------------------|---|----|----|----|
| 1  | patients you would treat under normal circumstances, with respect to female participation?                                                                     |                          |   |    |    |    |
| 2  |                                                                                                                                                                |                          |   |    |    |    |
| 3  |                                                                                                                                                                |                          |   |    |    |    |
| 4  | Q10 Are the patients you are currently treating representative of the patients you would treat under normal circumstances, with respect to male participation? | Yes – Table 1            | 6 | 15 | 85 | 29 |
| 5  |                                                                                                                                                                |                          |   |    |    |    |
| 6  |                                                                                                                                                                |                          |   |    |    |    |
| 7  |                                                                                                                                                                |                          |   |    |    |    |
| 8  |                                                                                                                                                                |                          |   |    |    |    |
| 9  | Q11 Approximately what percentage of the patients you saw in the last 7 days were <u>female</u> ?                                                              | Yes – Page 8 & Table 1   | 6 | 14 | 77 | 28 |
| 10 |                                                                                                                                                                |                          |   |    |    |    |
| 11 |                                                                                                                                                                |                          |   |    |    |    |
| 12 | Q12 Are you using any of the following technology to deliver a cardiac rehabilitation exercise <u>assessment</u> ?                                             | Yes – Page 9 & Figure 2  | 6 | 14 | 84 | 29 |
| 13 |                                                                                                                                                                |                          |   |    |    |    |
| 14 |                                                                                                                                                                |                          |   |    |    |    |
| 15 |                                                                                                                                                                |                          |   |    |    |    |
| 16 | Q13 How are you assessing functional capacity during your assessment?                                                                                          | Yes – Page 9             | 6 | 14 | 84 | 29 |
| 17 |                                                                                                                                                                |                          |   |    |    |    |
| 18 |                                                                                                                                                                |                          |   |    |    |    |
| 19 | Q14 Are you using any of the following technology to <u>deliver</u> the physical activity/exercise component of cardiac rehabilitation?                        | Yes – Page 11 & Figure 3 | 6 | 14 | 84 | 29 |
| 20 |                                                                                                                                                                |                          |   |    |    |    |
| 21 |                                                                                                                                                                |                          |   |    |    |    |
| 22 |                                                                                                                                                                |                          |   |    |    |    |
| 23 | Q15 Did you use this technology before the COVID-19 restrictions?                                                                                              | Yes - Page 8             | 6 | 14 | 81 | 27 |
| 24 |                                                                                                                                                                |                          |   |    |    |    |
| 25 | Date of technology adoption                                                                                                                                    | Yes – Page 8             | 5 | 14 | 80 | 27 |
| 26 | Q17 If you used remote technology before the COVID-19 restrictions, have you found that:                                                                       | No                       | 6 | 7  | 44 | 8  |
| 27 |                                                                                                                                                                |                          |   |    |    |    |
| 28 |                                                                                                                                                                |                          |   |    |    |    |
| 29 |                                                                                                                                                                |                          |   |    |    |    |
| 30 | -The same number of patients are accessing exercise-based cardiac rehabilitation using technology                                                              |                          |   |    |    |    |
| 31 |                                                                                                                                                                |                          |   |    |    |    |
| 32 | -Fewer patients are accessing exercise-based cardiac rehabilitation using technology                                                                           |                          |   |    |    |    |
| 33 |                                                                                                                                                                |                          |   |    |    |    |
| 34 | -No patients are accessing exercise-based cardiac rehabilitation using technology                                                                              |                          |   |    |    |    |
| 35 |                                                                                                                                                                |                          |   |    |    |    |
| 36 |                                                                                                                                                                |                          |   |    |    |    |
| 37 |                                                                                                                                                                |                          |   |    |    |    |
| 38 |                                                                                                                                                                |                          |   |    |    |    |
| 39 |                                                                                                                                                                |                          |   |    |    |    |
| 40 |                                                                                                                                                                |                          |   |    |    |    |
| 41 |                                                                                                                                                                |                          |   |    |    |    |
| 42 |                                                                                                                                                                |                          |   |    |    |    |
| 43 |                                                                                                                                                                |                          |   |    |    |    |
| 44 |                                                                                                                                                                |                          |   |    |    |    |
| 45 |                                                                                                                                                                |                          |   |    |    |    |
| 46 |                                                                                                                                                                |                          |   |    |    |    |

|                                      |                                                                                                                                                                 |               |   |    |    |    |     |
|--------------------------------------|-----------------------------------------------------------------------------------------------------------------------------------------------------------------|---------------|---|----|----|----|-----|
| 1<br>2<br>3<br>4<br>5<br>6<br>7<br>8 | Q18 Are you able to use technology to deliver exercise-based cardiac rehabilitation to:<br>-Low risk patients<br>-Moderate risk patients<br>-High risk patients | Yes – Page 11 | 6 | 12 | 79 | 26 | 123 |
| 9<br>10<br>11<br>12<br>13<br>14      | Q19 I am able to offer <u>physical activity recommendations</u> to patients that have not had an assessment in person? (i.e. in the same room as the assessor)  | Yes – Page 11 | 6 | 12 | 79 | 26 | 123 |
| 15<br>16<br>17<br>18<br>19           | Q20 I am able to offer an <u>exercise prescription</u> to patients that have not had an assessment in person? (i.e. in the same room as the assessor)           | Yes – Page 11 | 6 | 12 | 79 | 26 | 123 |
| 20<br>21<br>22<br>23<br>24           | Q21 Can you briefly describe what kind of physical activity recommendations you are making and/or exercises you are prescribing?                                | No            | 6 | 7  | 44 | 8  | 65  |
| 25<br>26<br>27                       | Q22 How many supervised physical activity/exercise training sessions can a patient attend, each week?                                                           | No            | 6 | 11 | 72 | 26 | 115 |
| 28<br>29<br>30<br>31<br>32<br>33     | Q23 Are the physical activity/exercise sessions you are supervising:<br><br>Group exercise<br><br>One-on-one                                                    | No            | 5 | 8  | 24 | 24 | 61  |
| 34<br>35<br>36<br>37                 | Q24 How long is each <u>supervised</u> physical activity/exercise session? Please provide your answer in minutes.                                               | No            | 5 | 8  | 25 | 26 | 64  |
| 38<br>39<br>40<br>41<br>42           | Q25 How many <u>unsupervised</u> physical activity/exercise training sessions are you prescribing for a patient, each week?                                     | No            | 5 | 10 | 70 | 24 | 109 |

1  
2  
3  
4  
5  
6  
7  
8  
9  
10  
11  
12  
13  
14  
15  
16  
17  
18  
19  
20  
21  
22  
23  
24  
25  
26  
27  
28  
29  
30  
31  
32  
33  
34  
35  
36  
37  
38  
39  
40  
41  
42  
43  
44  
45  
46

|    |                                                                                                                                                                       |                                          |   |   |    |    |     |
|----|-----------------------------------------------------------------------------------------------------------------------------------------------------------------------|------------------------------------------|---|---|----|----|-----|
| 1  | Q26 How long is each unsupervised physical activity/exercise session? Please provide your answer in minutes.                                                          | No                                       | 4 | 9 | 56 | 12 | 81  |
| 2  |                                                                                                                                                                       |                                          |   |   |    |    |     |
| 3  |                                                                                                                                                                       |                                          |   |   |    |    |     |
| 4  |                                                                                                                                                                       |                                          |   |   |    |    |     |
| 5  | Q27 What intensity range do you recommend/prescribe?                                                                                                                  | No                                       | 6 | 9 | 70 | 24 | 109 |
| 6  |                                                                                                                                                                       |                                          |   |   |    |    |     |
| 7  | Q28 Is this intensity                                                                                                                                                 | No                                       | 6 | 9 | 70 | 24 | 109 |
| 8  | Q29 Do you think that the programmes you are providing are:                                                                                                           | No                                       | 6 | 9 | 70 | 24 | 109 |
| 9  |                                                                                                                                                                       |                                          |   |   |    |    |     |
| 10 | Q30 What barriers have you encountered when using technology to deliver cardiac rehabilitation? (tick all that apply)                                                 | Yes – Page 11 & Table 2                  | 6 | 9 | 68 | 24 | 107 |
| 11 |                                                                                                                                                                       |                                          |   |   |    |    |     |
| 12 |                                                                                                                                                                       |                                          |   |   |    |    |     |
| 13 |                                                                                                                                                                       |                                          |   |   |    |    |     |
| 14 | Q31 How many adverse events resulting in minor injury have been reported since you have started delivering cardiac rehabilitation remotely?                           | Yes – Page 11                            | 6 | 9 | 68 | 24 | 107 |
| 15 |                                                                                                                                                                       |                                          |   |   |    |    |     |
| 16 |                                                                                                                                                                       |                                          |   |   |    |    |     |
| 17 |                                                                                                                                                                       |                                          |   |   |    |    |     |
| 18 |                                                                                                                                                                       |                                          |   |   |    |    |     |
| 19 | Q32 How many adverse events resulting in life changing injury have been reported since you have started delivering cardiac rehabilitation remotely?                   | Yes – Page 11                            | 6 | 9 | 68 | 24 | 107 |
| 20 |                                                                                                                                                                       |                                          |   |   |    |    |     |
| 21 |                                                                                                                                                                       |                                          |   |   |    |    |     |
| 22 |                                                                                                                                                                       |                                          |   |   |    |    |     |
| 23 |                                                                                                                                                                       |                                          |   |   |    |    |     |
| 24 | Q33 How many adverse events resulting in death have been reported since you have started delivering cardiac rehabilitation remotely?                                  | Yes – Page 11                            | 6 | 9 | 68 | 24 | 107 |
| 25 |                                                                                                                                                                       |                                          |   |   |    |    |     |
| 26 |                                                                                                                                                                       |                                          |   |   |    |    |     |
| 27 |                                                                                                                                                                       |                                          |   |   |    |    |     |
| 28 |                                                                                                                                                                       |                                          |   |   |    |    |     |
| 29 |                                                                                                                                                                       |                                          |   |   |    |    |     |
| 30 | Q34 Do you think that the way you are using technology now should be an option for patients in your future standard practice?                                         | Yes – Page 15                            | 6 | 8 | 68 | 24 | 106 |
| 31 |                                                                                                                                                                       |                                          |   |   |    |    |     |
| 32 |                                                                                                                                                                       |                                          |   |   |    |    |     |
| 33 |                                                                                                                                                                       |                                          |   |   |    |    |     |
| 34 | Q35 Is there anything else you would like to tell us about your experience or approaches to delivering exercise-based cardiac rehabilitation using remote technology? | Yes – Qualitative synthesis; Pages 12-15 | 1 | 4 | 39 | 13 | 57  |
| 35 |                                                                                                                                                                       |                                          |   |   |    |    |     |
| 36 |                                                                                                                                                                       |                                          |   |   |    |    |     |
| 37 |                                                                                                                                                                       |                                          |   |   |    |    |     |
| 38 |                                                                                                                                                                       |                                          |   |   |    |    |     |
| 39 |                                                                                                                                                                       |                                          |   |   |    |    |     |
| 40 |                                                                                                                                                                       |                                          |   |   |    |    |     |
| 41 |                                                                                                                                                                       |                                          |   |   |    |    |     |
| 42 |                                                                                                                                                                       |                                          |   |   |    |    |     |
| 43 |                                                                                                                                                                       |                                          |   |   |    |    |     |
| 44 |                                                                                                                                                                       |                                          |   |   |    |    |     |
| 45 |                                                                                                                                                                       |                                          |   |   |    |    |     |
| 46 |                                                                                                                                                                       |                                          |   |   |    |    |     |
