# Supplementary material for: How has technology been used to deliver cardiac rehabilitation during the COVID-19 pandemic? An international cross-sectional survey of healthcare professionals conducted by the BACPR
Source: PubMed Central journal article supplement — BMJ Open. 2021 Apr 20;11(4):e046051. doi: 10.1136/bmjopen-2020-046051 (PMC8061561; doi:10.1136/bmjopen-2020-046051), 2021-04-20
Supplement: bmjopen-2020-046051supp004.pdf [file bmjopen-2020-046051supp004.pdf]

| Question                                                                                                                                                                                                                                                                                    | Results reported in Manuscript | Phase I Responses | Phase II Responses | Phase III Responses | Phase IV Responses | Total Responses |
|---------------------------------------------------------------------------------------------------------------------------------------------------------------------------------------------------------------------------------------------------------------------------------------------|--------------------------------|-------------------|--------------------|---------------------|--------------------|-----------------|
| Q1 Which phase of cardiac rehabilitation do you work in: (please tick the phase which you spend most of your time)                                                                                                                                                                          | Yes – Page 7                   | 14                | 29                 | 164                 | 123                | 330             |
| Q2) Which country do you work in?                                                                                                                                                                                                                                                           | Yes – Page 7                   | 14                | 29                 | 164                 | 123                | 330             |
| Q3) Have you continued to provide exercise-based cardiac rehabilitation services during the COVID-19 outbreak?                                                                                                                                                                              | Yes – Page 8 & Table 1         | 14                | 29                 | 164                 | 123                | 330             |
| <b>The following questions are applicable to a maximum of 167 respondents due to 163 programmes stating that their service had been suspended</b>                                                                                                                                           |                                |                   |                    |                     |                    |                 |
| Q4 Since the COVID-19 outbreak, has your service found that:<br>-The same number of patients are accessing exercise-based cardiac rehabilitation<br>-Fewer patients are accessing exercise-based cardiac rehabilitation<br>-No patients are accessing exercise-based cardiac rehabilitation | Yes – Page 8 & Table 1         | 8                 | 17                 | 102                 | 34                 | 161             |
| Q5 Are the patients you are currently treating representative of the patients you would treat under normal circumstances, with respect to ethnicity?                                                                                                                                        | Yes – Page 8 & Table 1         | 7                 | 16                 | 95                  | 33                 | 151             |
| Q6 <u>Only answer this question if you are a UK centre.</u> Approximately what percentage of the patients you saw in the last 7 days were White British?                                                                                                                                    | Yes – Page 8 & Table 1         | 5                 | 5                  | 83                  | 30                 | 123             |
| Q7 Are the patients you are currently treating representative of the patients you would treat under normal circumstances, with respect to age?                                                                                                                                              | Yes – Page 8 & Table 1         | 7                 | 15                 | 92                  | 32                 | 146             |
| Q8 Approximately what percentage of the patients you saw in the last 7 days were over 65 years old?                                                                                                                                                                                         | Yes – Page 8 & Table 1         | 7                 | 13                 | 88                  | 31                 | 139             |
| Q9 Are the patients you are currently treating representative of the                                                                                                                                                                                                                        | Yes – Page 8 & Table 1         | 6                 | 15                 | 85                  | 29                 | 135             |

|                                                                                                                                                                                                                                                                                                                                                                                        |                          |   |    |    |    |     |
|----------------------------------------------------------------------------------------------------------------------------------------------------------------------------------------------------------------------------------------------------------------------------------------------------------------------------------------------------------------------------------------|--------------------------|---|----|----|----|-----|
| patients you would treat under normal circumstances, with respect to female participation?                                                                                                                                                                                                                                                                                             |                          |   |    |    |    |     |
| Q10 Are the patients you are currently treating representative of the patients you would treat under normal circumstances, with respect to male participation?                                                                                                                                                                                                                         | Yes – Table 1            | 6 | 15 | 85 | 29 | 135 |
| Q11 Approximately what percentage of the patients you saw in the last 7 days were female?                                                                                                                                                                                                                                                                                              | Yes – Page 8 & Table 1   | 6 | 14 | 77 | 28 | 125 |
| Q12 Are you using any of the following technology to deliver a cardiac rehabilitation exercise assessment?                                                                                                                                                                                                                                                                             | Yes – Page 9 & Figure 2  | 6 | 14 | 84 | 29 | 133 |
| Q13 How are you assessing functional capacity during your assessment?                                                                                                                                                                                                                                                                                                                  | Yes – Page 9             | 6 | 14 | 84 | 29 | 133 |
| Q14 Are you using any of the following technology to deliver the physical activity/exercise component of cardiac rehabilitation?                                                                                                                                                                                                                                                       | Yes – Page 11 & Figure 3 | 6 | 14 | 84 | 29 | 133 |
| Q15 Did you use this technology before the COVID-19 restrictions?                                                                                                                                                                                                                                                                                                                      | Yes - Page 8             | 6 | 14 | 81 | 27 | 128 |
| Date of technology adoption                                                                                                                                                                                                                                                                                                                                                            | Yes – Page 8             | 5 | 14 | 80 | 27 | 126 |
| Q17 If you used remote technology before the COVID-19 restrictions, have you found that:<br><br>-The same number of patients are accessing exercise-based cardiac rehabilitation using technology<br><br>-Fewer patients are accessing exercise-based cardiac rehabilitation using technology<br><br>-No patients are accessing exercise-based cardiac rehabilitation using technology | No                       | 6 | 7  | 44 | 8  | 65  |

|                                                                                                                                                                     |               |   |    |    |    |     |
|---------------------------------------------------------------------------------------------------------------------------------------------------------------------|---------------|---|----|----|----|-----|
| Q18 Are you able to use technology to deliver exercise-based cardiac rehabilitation to:<br><br>-Low risk patients<br>-Moderate risk patients<br>-High risk patients | Yes – Page 11 | 6 | 12 | 79 | 26 | 123 |
| Q19 I am able to offer <u>physical activity recommendations</u> to patients that have not had an assessment in person? (i.e. in the same room as the assessor)      | Yes – Page 11 | 6 | 12 | 79 | 26 | 123 |
| Q20 I am able to offer an <u>exercise prescription</u> to patients that have not had an assessment in person? (i.e. in the same room as the assessor)               | Yes – Page 11 | 6 | 12 | 79 | 26 | 123 |
| Q21 Can you briefly describe what kind of physical activity recommendations you are making and/or exercises you are prescribing?                                    | No            | 6 | 7  | 44 | 8  | 65  |
| Q22 How many supervised physical activity/exercise training sessions can a patient attend, each week?                                                               | No            | 6 | 11 | 72 | 26 | 115 |
| Q23 Are the physical activity/exercise sessions you are supervising:<br><br>Group exercise<br><br>One-on-one                                                        | No            | 5 | 8  | 24 | 24 | 61  |
| Q24 How long is each <u>supervised</u> physical activity/exercise session? Please provide your answer in minutes.                                                   | No            | 5 | 8  | 25 | 26 | 64  |
| Q25 How many <u>unsupervised</u> physical activity/exercise training sessions are you prescribing for a patient, each week?                                         | No            | 5 | 10 | 70 | 24 | 109 |

|                                                                                                                                                                       |                                          |   |   |    |    |     |
|-----------------------------------------------------------------------------------------------------------------------------------------------------------------------|------------------------------------------|---|---|----|----|-----|
| Q26 How long is each unsupervised physical activity/exercise session? Please provide your answer in minutes.                                                          | No                                       | 4 | 9 | 56 | 12 | 81  |
| Q27 What intensity range do you recommend/prescribe?                                                                                                                  | No                                       | 6 | 9 | 70 | 24 | 109 |
| Q28 Is this intensity                                                                                                                                                 | No                                       | 6 | 9 | 70 | 24 | 109 |
| Q29 Do you think that the programmes you are providing are:                                                                                                           | No                                       | 6 | 9 | 70 | 24 | 109 |
| Q30 What barriers have you encountered when using technology to deliver cardiac rehabilitation? (tick all that apply)                                                 | Yes – Page 11 & Table 2                  | 6 | 9 | 68 | 24 | 107 |
| Q31 How many adverse events resulting in minor injury have been reported since you have started delivering cardiac rehabilitation remotely?                           | Yes – Page 11                            | 6 | 9 | 68 | 24 | 107 |
| Q32 How many adverse events resulting in life changing injury have been reported since you have started delivering cardiac rehabilitation remotely?                   | Yes – Page 11                            | 6 | 9 | 68 | 24 | 107 |
| Q33 How many adverse events resulting in death have been reported since you have started delivering cardiac rehabilitation remotely?                                  | Yes – Page 11                            | 6 | 9 | 68 | 24 | 107 |
| Q34 Do you think that the way you are using technology now should be an option for patients in your future standard practice?                                         | Yes – Page 15                            | 6 | 8 | 68 | 24 | 106 |
| Q35 Is there anything else you would like to tell us about your experience or approaches to delivering exercise-based cardiac rehabilitation using remote technology? | Yes – Qualitative synthesis; Pages 12-15 | 1 | 4 | 39 | 13 | 57  |
